# Supplementary material
Source: Research Square preprint supplement (doi:10.21203/rs.3.rs-8304459/v1)
Supplement: Supplementary file 1 [file 10868105482392e04ef0326c.xlsx]

## Sheet: Sheet1
	logFC	AveExpr	t	P.Value	adj.P.Val	B
Jund	-0.89345	10.532	-14.3758	1.58527e-10	1.24983e-06	14.4876
Jun	-1.91069	8.39794	-13.4933	4.03722e-10	1.59147e-06	13.5796
Il7r	-2.02497	6.94054	-11.7608	2.97064e-09	7.80685e-06	11.5031
Armc7	-1.60436	7.16975	-10.4785	1.52601e-08	2.45691e-05	9.9728
Tespa1	-1.10425	7.30153	-10.4629	1.55816e-08	2.45691e-05	9.94421
Ptma	-0.618269	9.97268	-9.84766	3.61472e-08	4.74974e-05	9.00977
Tubb5	-0.745204	8.44006	-9.2256	8.81186e-08	9.92467e-05	8.25537
Jak1	0.546989	10.993	8.93601	1.35386e-07	0.000133423	7.57865
Tsc22d3	-1.0894	8.38816	-8.57446	2.34616e-07	0.000205523	7.26431
Btg2	-0.622887	9.30058	-8.45353	2.82965e-07	0.00022309	6.98706
Rhob	-1.95948	5.3401	-8.29838	3.60799e-07	0.000258594	6.62592
Cd7	-1.14221	7.58964	-8.10053	4.93986e-07	0.0003013	6.59032
Tubb4b	-1.00466	6.94032	-8.09696	4.96816e-07	0.0003013	6.59683
Ier2	-0.680813	9.62655	-8.0287	5.54345e-07	0.000312175	6.25338
Bcl2	-1.86318	5.32619	-7.92295	6.57659e-07	0.000336246	6.08199
Klf6	-0.806789	9.57768	-7.85997	7.28616e-07	0.000336246	5.97272
Fos	-1.15066	7.65274	-7.85935	7.29354e-07	0.000336246	6.19642
Rps11	0.422483	11.5194	7.80387	7.98593e-07	0.000336246	5.67266
Rpl18a	0.366548	11.8646	7.79496	8.10333e-07	0.000336246	5.60779
Itga4	0.434934	10.1766	7.66493	1.00395e-06	0.000388829	5.62299
Ccl5	0.532855	15.6221	7.64614	1.03569e-06	0.000388829	4.85709
Rplp0	0.612534	11.7873	7.52121	1.27545e-06	0.000452977	5.16047
Klf2	-0.459469	11.4926	-7.50007	1.32147e-06	0.000452977	5.1185
Ly6e	-0.731861	7.98218	-7.46063	1.41199e-06	0.00046384	5.52486
Evl	-0.988809	7.19683	-6.92993	3.51458e-06	0.00110836	4.68606
B2m	0.380201	11.1213	6.85281	4.02528e-06	0.00119581	4.05469
Nabp1	-1.18273	5.80587	-6.84305	4.09523e-06	0.00119581	4.50191
H2-Q10	-1.36611	5.21447	-6.74827	4.84441e-06	0.00136405	4.22712
Klhl6	-0.829866	7.28697	-6.72244	5.07236e-06	0.00137898	4.32184
Junb	-0.711865	10.2186	-6.6226	6.06449e-06	0.00154445	3.71108
Fasl	-0.694695	8.24189	-6.62183	6.07281e-06	0.00154445	4.02193
Ifit3	-1.6791	3.87817	-6.52363	7.24901e-06	0.00178598	3.34622
Eef2	0.490453	11.331	6.40415	9.00765e-06	0.00215201	3.20018
Lgals1	0.439819	11.7176	6.38462	9.33492e-06	0.0021646	3.10413
Actn1	2.7368	4.00432	6.32875	1.03412e-05	0.00232942	1.97826
Capg	0.948885	6.95621	6.30298	1.08429e-05	0.00236673	3.62026
Mif	-0.730552	7.1099	-6.2899	1.11072e-05	0.00236673	3.5746
Rabac1	-0.556031	8.25506	-6.16016	1.41212e-05	0.00292977	3.17827
Ahnak	0.320555	11.4486	6.13889	1.46914e-05	0.00296993	2.67144
Ssh2	-1.05912	5.67457	-6.04753	1.74263e-05	0.00343472	3.15107
Gramd4	-1.02431	5.53734	-6.02356	1.82278e-05	0.00350349	3.08732
Lsp1	0.621293	10.2597	6.01097	1.8664e-05	0.00350349	2.62182
Cd53	-0.700575	7.94565	-5.89952	2.30331e-05	0.0042231	2.73427
Rps3	0.322298	11.4941	5.87989	2.39068e-05	0.00428367	2.16376
Rpl32	0.397928	11.4889	5.83621	2.59756e-05	0.00455093	2.08313
Reep5	0.54925	9.37969	5.79185	2.82678e-05	0.00484485	2.35628
Prr13	0.761716	8.98141	5.76487	2.97634e-05	0.00499266	2.39453
Srsf5	-0.355403	9.25698	-5.65978	3.6417e-05	0.00596227	2.05262
Uqcrh	0.457105	9.24189	5.65075	3.70562e-05	0.00596227	2.09539
Mybbp1a	-0.767982	6.23092	-5.54472	4.54942e-05	0.00709028	2.26556
Ddx5	-0.435422	10.7348	-5.54054	4.58656e-05	0.00709028	1.57175
Rpl18	0.412755	11.3472	5.52524	4.72491e-05	0.0071637	1.49021
Eif3f	0.522055	9.66639	5.4927	5.03391e-05	0.00748818	1.71271
Tuba1b	-1.16406	6.84326	-5.41006	5.91585e-05	0.00863714	1.93631
Tcf7	-2.45496	3.17282	-5.36656	6.44289e-05	0.00919225	1.48561
Dtx1	-0.789176	7.49161	-5.35979	6.52925e-05	0.00919225	1.76445
Rbm38	-0.620274	6.96814	-5.34855	6.67509e-05	0.0092327	1.83553
Ppp1r15a	-0.686949	8.07625	-5.33107	6.90862e-05	0.00939096	1.60465
Ucp2	0.565828	9.29809	5.2859	7.55227e-05	0.0100919	1.3776
Tpst2	-0.338115	8.87114	-5.2693	7.80405e-05	0.0102545	1.35569
Tspan32	2.584	6.23189	5.2205	8.59555e-05	0.0111094	1.52801
mt-Nd2	-0.444512	9.83817	-5.18866	9.15622e-05	0.0116432	1.00691
Atxn1	1.01092	5.94644	5.13528	0.000101821	0.0127421	1.46528
Kcna3	-0.854618	5.69404	-5.10398	0.000108381	0.0133512	1.45605
Hirip3	-1.80216	3.53392	-5.07846	0.00011405	0.0138334	1.0804
Hspbp1	-1.06195	4.64831	-5.04729	0.000121392	0.0142987	1.25881
Klrg1	0.503534	9.36764	5.04679	0.000121513	0.0142987	0.872909
Ccr2	0.804388	8.14823	5.03278	0.000124973	0.0144895	1.11849
Hip1	1.05403	6.40902	5.01796	0.000128745	0.0145644	1.29377
Ctsc	0.786349	6.95962	5.01576	0.000129314	0.0145644	1.26946
Rps20	-0.261732	10.5056	-4.99148	0.000135776	0.0150769	0.505363
Slfn1	-0.989393	6.85323	-4.93421	0.000152364	0.0162651	1.02025
Laptm5	0.277897	11.3456	4.93379	0.000152494	0.0162651	0.285416
Gpx8	2.26395	4.83956	4.93323	0.000152666	0.0162651	0.710714
Dcun1d2	-1.32979	4.2059	-4.89817	0.000163859	0.0170852	0.939843
Slfn2	-0.41475	9.09977	-4.89164	0.000166037	0.0170852	0.539623
Rpl17	0.304475	11.3772	4.88917	0.000166865	0.0170852	0.190362
Hspa9	-0.701043	6.06024	-4.87361	0.000172201	0.0174056	1.01342
Pycard	0.809426	8.77052	4.86702	0.000174512	0.0174159	0.663763
Il18rap	0.388705	8.96993	4.83349	0.000186773	0.0184065	0.510056
Cxcr6	0.543507	9.08585	4.81805	0.000192713	0.0187574	0.466275
S100a10	0.276921	11.0425	4.80989	0.000195931	0.0188381	0.0744674
Rev1	-1.54804	4.22571	-4.79117	0.000203524	0.0192094	0.765278
Cpne7	-2.07749	2.89416	-4.78586	0.000205729	0.0192094	0.439146
Rtp4	-1.71143	3.17445	-4.78259	0.000207103	0.0192094	0.482739
Oas3	-1.25757	3.98149	-4.77022	0.000212376	0.0192711	0.648905
Fth1	-0.414078	10.4325	-4.76957	0.000212657	0.0192711	0.0522302
Ctsw	-0.446338	9.44463	-4.75323	0.000219847	0.0196963	0.18992
Sfi1	-1.02621	6.31713	-4.74615	0.000223041	0.0197579	0.729446
Plcxd2	-1.01175	5.63656	-4.73172	0.000229693	0.0200132	0.757778
Tef	-1.11853	4.53864	-4.72893	0.000231	0.0200132	0.685773
Gimap3	-0.498966	9.6169	-4.70065	0.000244715	0.020971	0.0471067
Polr2a	-0.412153	8.55574	-4.69398	0.000248073	0.0210302	0.245865
Nucks1	-0.535944	6.97314	-4.66725	0.000261995	0.0219459	0.502992
Hcst	0.53551	10.0512	4.66189	0.000264881	0.0219459	-0.0489854
Gzma	0.389049	13.4488	4.65758	0.000267226	0.0219459	-0.599326
Pygo2	-0.890121	5.51158	-4.62334	0.000286626	0.0232965	0.555909
Txnip	-0.469757	8.93305	-4.61585	0.000291062	0.0234156	0.00201539
Nsmce1	-0.831233	5.23661	-4.60579	0.000297126	0.023662	0.520676
Dusp1	-0.892481	7.46004	-4.58799	0.000308172	0.0242302	0.219697
Rad9a	-0.738726	5.78809	-4.58068	0.000312833	0.0242302	0.466371
Arpc1b	0.319069	10.3468	4.57967	0.00031348	0.0242302	-0.286456
Pdia6	-0.620912	6.54249	-4.55258	0.00033142	0.0252101	0.33518
Crim1	-1.9438	4.56946	-4.55091	0.000332554	0.0252101	0.40825
Eif4a3	-0.448592	7.34499	-4.54096	0.00033943	0.0254863	0.185777
Polr2e	-0.511147	7.22749	-4.52924	0.00034771	0.0258204	0.180849
Tagap	-0.816511	6.59655	-4.52256	0.000352523	0.0258204	0.252901
Akap8	-0.571597	6.8471	-4.52012	0.000354299	0.0258204	0.226825
Chd3	-0.51418	8.49012	-4.51219	0.000360131	0.0258204	-0.121362
Eif1	-0.27792	10.8065	-4.51202	0.000360254	0.0258204	-0.534446
Lef1	-0.624991	7.21253	-4.50316	0.00036689	0.0260591	0.122064
Rnpepl1	-0.556544	6.39985	-4.48409	0.000381591	0.0266425	0.222
Srsf7	-0.491052	8.20127	-4.48302	0.00038244	0.0266425	-0.114428
Cnbp	-0.272148	9.22096	-4.47587	0.000388115	0.0266425	-0.330231
Stk32c	1.24468	5.36556	4.47393	0.000389674	0.0266425	0.209254
Ier5	-0.485548	8.72071	-4.46782	0.00039461	0.0266425	-0.26457
Cx3cr1	0.316349	9.70448	4.46688	0.00039538	0.0266425	-0.399396
Gpx4	-0.363473	8.02398	-4.45558	0.00040471	0.0270401	-0.123892
Racgap1	0.455305	7.64109	4.44138	0.000416745	0.0271351	0.00469741
Rpp30	-1.11703	4.63138	-4.43855	0.00041919	0.0271351	0.183457
Snx10	0.704622	7.22531	4.43746	0.000420133	0.0271351	0.0882344
Adipor2	-0.587742	6.37391	-4.43516	0.000422133	0.0271351	0.125846
Rps14	0.275892	11.2913	4.43253	0.000424438	0.0271351	-0.747324
Vkorc1	-0.971105	4.73193	-4.42986	0.000426782	0.0271351	0.169547
Fosb	-1.01124	5.5084	-4.42244	0.000433378	0.027334	0.173577
Cxcr4	-1.19773	3.90052	-4.41394	0.000441057	0.0275975	0.0403253
Rpl29	0.236467	10.531	4.39814	0.000455708	0.0282898	-0.703776
Cebpb	-0.905595	5.92797	-4.38264	0.000470567	0.0287902	0.0627775
Nol12	-0.827384	4.98997	-4.38212	0.000471073	0.0287902	0.0971572
Fyn	0.290254	9.47906	4.37574	0.000477337	0.0289486	-0.545718
Fkbp2	-1.2564	4.68503	-4.36772	0.000485331	0.0291011	0.0636906
Atp6v0a2	-0.552807	6.54086	-4.36583	0.000487233	0.0291011	-0.0318383
Kti12	-0.666325	5.74219	-4.35096	0.000502476	0.0297859	0.0296771
Zfp36	-0.709261	9.10994	-4.32881	0.000526087	0.0308173	-0.648271
Smim24	1.5285	4.71573	4.32646	0.000528668	0.0308173	-0.181438
Rap1b	0.246029	10.5031	4.32379	0.000531602	0.0308173	-0.853262
Hs6st1	-1.40824	3.68064	-4.30573	0.000551902	0.0315977	-0.168431
Nbn	-1.46882	3.3541	-4.3047	0.00055308	0.0315977	-0.239987
Icosl	2.06443	2.55863	4.29777	0.0005611	0.0318253	-0.712478
Klf3	-0.357403	9.14925	-4.29431	0.000565151	0.0318261	-0.700848
Ctsd	0.276261	10.4683	4.2829	0.000578697	0.0323578	-0.931508
Cish	-1.09963	5.41016	-4.27314	0.000590557	0.0327003	-0.10931
Nrp1	1.0263	6.32703	4.27106	0.000593118	0.0327003	-0.114217
1700020L24Rik	1.4851	3.53607	4.25827	0.000609102	0.0333483	-0.588583
Dnajc17	-1.08125	4.49047	-4.24575	0.000625171	0.0339921	-0.175327
Yif1b	-0.983334	5.00889	-4.23326	0.000641637	0.0346484	-0.177188
Map3k14	-0.827403	5.05927	-4.20876	0.000675207	0.0360018	-0.22289
Mettl13	-1.21563	3.23371	-4.20832	0.000675833	0.0360018	-0.446601
Gimap6	-0.580078	9.08218	-4.2026	0.000683927	0.0361885	-0.888388
Eif5b	-0.601541	6.81218	-4.19726	0.000691591	0.03635	-0.429081
Fubp1	-0.518445	6.78721	-4.19228	0.000698801	0.0364857	-0.420934
Ranbp1	-0.500028	6.98698	-4.17331	0.000726995	0.0377081	-0.493742
Timm22	-0.912005	4.69781	-4.16429	0.00074079	0.037948	-0.315848
Dnajc15	-0.340247	8.92671	-4.164	0.000741246	0.037948	-0.920902
Nsa2	0.341687	8.41466	4.15593	0.000753828	0.0383431	-0.765246
Psmb6	-0.467786	7.04432	-4.15031	0.000762722	0.0385232	-0.547039
Cd52	0.238611	11.5933	4.14754	0.000767142	0.0385232	-1.39542
Smg5	-0.607861	5.9921	-4.13987	0.000779522	0.0386488	-0.407695
Ndufa5	-0.69376	6.37568	-4.13856	0.000781665	0.0386488	-0.477128
Rpl4	0.278714	9.71313	4.13393	0.000789254	0.0386488	-1.09918
Hspe1	-0.443274	7.85159	-4.13226	0.000792001	0.0386488	-0.757224
Slc39a10	-1.21031	4.14516	-4.13097	0.000794153	0.0386488	-0.413108
Copg1	-0.504947	6.49308	-4.10413	0.000839939	0.0406262	-0.547754
Hrh2	-0.993478	4.72738	-4.08976	0.000865556	0.04161	-0.450156
Exosc1	-0.672758	5.8243	-4.07655	0.000889795	0.042516	-0.509988
Hmgb2	0.514726	8.6471	4.07098	0.000900214	0.0425709	-0.982307
Icam2	-0.783042	5.95168	-4.07017	0.000901744	0.0425709	-0.5375
Ddx11	-1.0782	4.25752	-4.06188	0.000917521	0.0430415	-0.524863
Actg1	0.291605	11.2502	4.05922	0.00092263	0.0430415	-1.52432
Prmt7	-0.977075	4.35431	-4.04699	0.00094656	0.0438981	-0.547453
Vim	0.451962	10.1014	4.03945	0.000961603	0.0440536	-1.36306
Socs1	-1.11212	4.86894	-4.03641	0.000967752	0.0440536	-0.545883
Fxyd1	3.51685	3.79112	4.03391	0.000972838	0.0440536	-1.0491
Man2c1	-1.12154	4.56249	-4.03301	0.000974657	0.0440536	-0.55908
Arrdc3	-0.971791	4.16299	-4.03145	0.000977851	0.0440536	-0.595179
Ptch1	-1.13161	3.81277	-4.02642	0.000988205	0.0442671	-0.638751
Tpm3	-0.26385	9.12846	-4.01499	0.00101215	0.0450837	-1.27297
Klc2	-1.2003	3.59217	-3.99539	0.00105456	0.0460922	-0.713475
Arl2	-0.933982	4.03083	-3.99473	0.00105603	0.0460922	-0.676636
Mdn1	-1.03165	4.80964	-3.99443	0.0010567	0.0460922	-0.624321
Acss2	0.457074	7.36786	3.99376	0.00105818	0.0460922	-0.855048
Plk3	-1.12777	4.78788	-3.98745	0.00107226	0.0462533	-0.637207
Xpo1	-0.723486	5.69803	-3.98685	0.00107361	0.0462533	-0.675268
Gng2	0.625671	7.14669	3.98177	0.00108511	0.0464945	-0.819986
Zfp871	-0.600133	6.22384	-3.97736	0.00109519	0.0466728	-0.758776
Rlim	-0.579131	6.42458	-3.96127	0.00113277	0.0478376	-0.82651
Ifi213	-0.574951	6.51379	-3.95915	0.0011378	0.0478376	-0.845829
Hnrnpm	-0.457267	7.65286	-3.95625	0.00114476	0.0478376	-1.08522
Pgs1	-0.820994	4.97075	-3.9554	0.00114679	0.0478376	-0.697142
S100a4	1.14577	7.21986	3.92902	0.00121206	0.0501991	-0.897368
Eif4a2	-0.449133	8.01808	-3.9253	0.00122154	0.0501991	-1.23189
Rack1	0.344303	10.2296	3.92387	0.00122522	0.0501991	-1.63632
N4bp2l2	-0.494548	6.66489	-3.92159	0.00123109	0.0501991	-0.943018
Ddx39b	-0.344036	7.8948	-3.91903	0.00123772	0.0501991	-1.20484
Isoc1	-1.00459	3.77023	-3.91616	0.00124521	0.0501991	-0.840559
Timm50	-0.834624	5.2734	-3.9151	0.00124797	0.0501991	-0.78159
Kbtbd11	-1.61012	3.29431	-3.91165	0.00125705	0.0503074	-0.89061
Trmt1	-0.870444	4.95727	-3.89662	0.00129737	0.0516588	-0.807424
Hdgf	-0.441237	7.11761	-3.88356	0.00133342	0.0526528	-1.1054
Pnrc1	-0.293162	9.39916	-3.88276	0.00133569	0.0526528	-1.60681
Nop2	-0.856513	4.66203	-3.87846	0.00134778	0.0528483	-0.841744
Ankrd39	-1.03327	4.50097	-3.8755	0.00135619	0.0528483	-0.848714
Prc1	1.69719	3.04233	3.86665	0.00138164	0.0528483	-1.28061
Jpt1	-0.269834	8.58685	-3.8631	0.00139199	0.0528483	-1.4721
Coq2	-0.714467	4.99037	-3.8622	0.00139463	0.0528483	-0.871131
Ifit1bl1	-1.04659	5.95723	-3.86217	0.00139472	0.0528483	-0.971059
Hnrnpab	-0.340259	8.05996	-3.85945	0.00140272	0.0528483	-1.36388
Phpt1	-0.914226	4.67194	-3.85906	0.00140386	0.0528483	-0.877897
Osbpl3	0.543289	7.0644	3.85876	0.00140476	0.0528483	-1.05621
Hsp90b1	-0.360879	8.64164	-3.85777	0.00140768	0.0528483	-1.50035
Kxd1	0.775111	6.59554	3.8499	0.00143115	0.0534749	-0.970347
Phf1	-0.388247	7.40462	-3.8298	0.0014929	0.0554452	-1.27556
Mettl16	-0.879921	5.15309	-3.82746	0.00150026	0.0554452	-0.946769
Serpinb1a	2.59162	3.13335	3.82597	0.00150498	0.0554452	-1.35055
Peli1	-0.508744	7.46183	-3.81925	0.00152639	0.0559723	-1.3277
Tmem63a	-0.94958	4.44246	-3.81687	0.00153404	0.0559926	-0.959948
Txndc17	0.514838	7.22775	3.81158	0.0015512	0.0562649	-1.18837
Ublcp1	-0.730039	5.28768	-3.81018	0.00155578	0.0562649	-0.981852
Psmg1	-0.985382	4.16836	-3.8075	0.00156455	0.0563238	-0.991497
Hspa5	-0.356217	8.5336	-3.8051	0.00157248	0.056352	-1.58762
Ddx54	-0.456277	6.58787	-3.79493	0.00160649	0.0571268	-1.18351
Tnks1bp1	-1.03473	3.74903	-3.7943	0.00160859	0.0571268	-1.05137
Crot	0.616418	6.43606	3.79063	0.00162106	0.0573114	-1.07403
Ftsj3	-0.7568	5.71533	-3.77681	0.00166887	0.0587384	-1.09002
Brd2	-0.400316	7.80208	-3.77335	0.00168108	0.0589052	-1.48197
Mospd3	0.782125	6.07975	3.77086	0.00168991	0.0589525	-1.06151
Hspa4	-0.348679	7.59967	-3.76812	0.00169967	0.0590317	-1.44684
Nop10	-0.41975	7.75526	-3.76135	0.00172405	0.059616	-1.50663
Hic1	-1.76485	3.58692	-3.7346	0.00182388	0.0627923	-1.14737
Ccm2	-0.498392	6.65487	-3.72699	0.00185332	0.0633035	-1.34246
Rpl34	0.363565	11.4527	3.72662	0.00185478	0.0633035	-2.25395
Hopx	-0.23868	9.25882	-3.72147	0.001875	0.0637175	-1.90998
Tbxa2r	-0.881609	4.93944	-3.71921	0.00188394	0.0637469	-1.13885
Klhl9	-0.668299	5.40856	-3.71114	0.0019162	0.0645611	-1.17769
Srp19	0.397296	7.82724	3.70664	0.00193447	0.0648994	-1.55114
Nolc1	-0.688332	6.28168	-3.70168	0.00195475	0.0653019	-1.33584
Heatr1	-0.839262	4.79612	-3.69234	0.00199359	0.0661952	-1.18599
Gnpda2	0.834167	5.25279	3.69122	0.00199828	0.0661952	-1.18856
Bcl7b	-0.439377	6.55545	-3.67946	0.00204837	0.0675706	-1.40482
Eif3e	0.371867	7.89386	3.67528	0.00206649	0.0678841	-1.63218
Stk11	-0.527216	6.02876	-3.66527	0.00211053	0.0690431	-1.34458
Ifi208	-1.52929	3.70737	-3.65648	0.00214992	0.0700412	-1.27989
Rps15a	0.256911	11.5785	3.65321	0.00216478	0.0702352	-2.43278
Pfdn2	-0.42852	6.93146	-3.64656	0.0021953	0.0709334	-1.55411
Card6	-0.534344	6.52767	-3.64276	0.00221296	0.0712121	-1.48092
Gabarapl2	0.289866	9.25301	3.63548	0.00224715	0.0720185	-2.04852
Hnrnpf	-0.248176	9.51248	-3.63307	0.00225857	0.0720914	-2.14815
Mterf1a	-0.574055	5.8803	-3.62861	0.00227988	0.072478	-1.39041
Fndc3a	-0.642298	5.37381	-3.62298	0.0023071	0.0730489	-1.34361
Noc4l	-0.692659	5.08966	-3.61884	0.00232728	0.0733871	-1.3305
Mrps16	0.728705	7.41064	3.61565	0.00234297	0.0733871	-1.61113
Rab1a	-0.438126	6.49764	-3.61261	0.00235803	0.0733871	-1.53077
Zyx	0.259439	9.90218	3.61056	0.00236823	0.0733871	-2.23491
Dync1h1	-0.398255	7.15812	-3.60669	0.00238764	0.0733871	-1.68003
Havcr2	0.932742	5.97407	3.60615	0.00239031	0.0733871	-1.36255
Letm2	-0.876446	4.80521	-3.6053	0.00239463	0.0733871	-1.35084
Srpk1	-0.364277	7.0764	-3.60472	0.00239752	0.0733871	-1.66085
Smpdl3b	0.838258	7.24806	3.60393	0.00240156	0.0733871	-1.58297
Tmtc4	-0.964019	3.36881	-3.59791	0.00243217	0.0740355	-1.43274
Ly6c2	0.220864	11.8298	3.58636	0.00249208	0.0755676	-2.61503
Rexo1	-0.505854	6.42066	-3.57943	0.00252872	0.0763623	-1.583
Myl12a	0.274474	9.43411	3.57763	0.00253832	0.0763623	-2.20662
Actb	0.204362	13.6844	3.57584	0.00254791	0.0763623	-2.92255
Ubash3b	0.723482	6.83057	3.57414	0.00255703	0.0763623	-1.55744
Pofut1	-0.810701	4.69288	-3.57021	0.00257829	0.0765926	-1.41013
Dnajc10	-0.70348	5.70605	-3.56913	0.00258418	0.0765926	-1.49778
Mical1	0.425543	7.74446	3.56615	0.00260043	0.0767857	-1.81775
Gipc2	1.63679	2.64981	3.55983	0.00263528	0.0775245	-1.73589
Klra3	-2.56093	4.21532	-3.55716	0.00265017	0.0776725	-1.43376
Manf	-0.422587	6.98183	-3.55327	0.00267195	0.0778633	-1.75013
Alg6	-1.0621	3.47039	-3.54862	0.00269828	0.0778633	-1.50236
Fxyd5	0.324822	10.8186	3.54751	0.00270456	0.0778633	-2.53262
Ly9	-0.341751	7.8521	-3.54732	0.00270565	0.0778633	-1.95778
Srrm2	-0.253776	9.35771	-3.54725	0.00270606	0.0778633	-2.29637
Tpt1	0.203998	12.3012	3.54342	0.00272799	0.0780213	-2.77953
Ly6a	-0.493803	7.75994	-3.54283	0.00273134	0.0780213	-1.96194
Shisa5	-0.320918	10.3465	-3.5337	0.00278437	0.079249	-2.51616
Coil	-1.0152	3.9214	-3.52808	0.00281753	0.0799042	-1.50255
Eif3h	0.298532	8.90375	3.5238	0.00284304	0.0801397	-2.1963
Esd	0.508845	7.20027	3.52326	0.00284628	0.0801397	-1.769
Cox7a2l	0.415331	7.83329	3.52159	0.00285632	0.0801397	-1.92564
Inf2	-1.09922	3.76847	-3.51822	0.00287666	0.0804239	-1.52477
Noc2l	-0.507717	6.36007	-3.50639	0.00294923	0.0821616	-1.71411
Tram1	0.327531	7.99509	3.49916	0.00299449	0.0831288	-2.02156
Ms4a4c	-1.04196	3.84833	-3.49632	0.00301245	0.0833338	-1.55624
Phf12	-0.500888	6.23509	-3.4838	0.00309294	0.0851161	-1.73569
Gpi1	0.352106	8.26579	3.48176	0.00310625	0.0851161	-2.1193
Cd226	0.69416	7.53919	3.4813	0.00310926	0.0851161	-1.91092
Cmpk1	0.428727	7.66842	3.47909	0.00312375	0.0852167	-1.97336
Zfp106	-0.451762	6.1865	-3.46651	0.00320761	0.0871546	-1.76005
Mtg2	-0.8831	4.09836	-3.46438	0.003222	0.0871546	-1.60592
Sh3bgrl	0.665285	6.46932	3.46149	0.00324166	0.0871546	-1.73039
Rpl7	0.199241	10.2824	3.46135	0.00324261	0.0871546	-2.62638
Rpl27a	0.226333	11.1793	3.46026	0.00325006	0.0871546	-2.7758
Hnrnpu	-0.308517	8.83753	-3.45572	0.00328131	0.0876421	-2.37914
Pfdn6	-0.46084	6.21206	-3.45439	0.00329047	0.0876421	-1.79108
Clic1	0.254983	9.56774	3.44974	0.0033229	0.0879386	-2.50403
Fzr1	0.852463	4.9113	3.44959	0.00332391	0.0879386	-1.63132
Cherp	-0.465794	6.27556	-3.44615	0.00334805	0.088281	-1.82288
Clpp	-0.527741	5.62865	-3.44434	0.00336086	0.0883234	-1.71101
Kcnn4	-0.561344	6.80646	-3.43835	0.00340349	0.0890641	-1.95096
Arpc3	0.278348	8.88373	3.43655	0.00341639	0.0890641	-2.37391
Nsmce4a	-0.354509	7.21845	-3.43545	0.00342435	0.0890641	-2.04095
Gtf2f1	-0.598901	5.86059	-3.43272	0.00344407	0.0890641	-1.7776
Lgals3	0.63511	8.48844	3.43252	0.00344553	0.0890641	-2.25017
Hdhd2	-0.933655	4.70353	-3.42667	0.00348823	0.0898498	-1.67722
Gltp	0.580674	7.10477	3.42524	0.00349872	0.0898498	-1.94144
Itgb1	0.297984	10.5008	3.41902	0.00354485	0.0901175	-2.75
Gle1	-0.53605	5.97988	-3.41766	0.00355497	0.0901175	-1.81779
Top3a	-0.796853	4.5315	-3.41626	0.00356547	0.0901175	-1.68913
Rps10	0.176386	11.6673	3.41575	0.00356928	0.0901175	-2.94815
Arl4c	-0.368563	9.53384	-3.41528	0.00357281	0.0901175	-2.61603
Eva1b	0.590434	6.06057	3.41463	0.00357772	0.0901175	-1.75553
Srsf2	-0.345901	7.94808	-3.41103	0.00360494	0.0905139	-2.26532
Mxi1	0.861555	5.52914	3.40731	0.00363327	0.0909355	-1.71446
Ikzf3	0.312443	8.4516	3.40526	0.00364899	0.0910401	-2.33172
Nop58	-0.660737	5.98822	-3.4022	0.00367258	0.0911352	-1.86522
Abhd8	-0.574591	6.38283	-3.40113	0.00368085	0.0911352	-1.93869
Zfp397	-0.758168	4.52696	-3.40027	0.00368749	0.0911352	-1.71826
Rbx1	-0.262654	8.08681	-3.39661	0.00371597	0.0912191	-2.32073
Ptp4a1	-0.515607	6.26418	-3.39551	0.00372463	0.0912191	-1.92796
Zc3h10	-0.884068	4.6226	-3.39504	0.00372829	0.0912191	-1.73143
Bach1	-0.805093	4.86866	-3.39255	0.00374789	0.0912191	-1.74482
Noa1	-0.824843	4.36367	-3.39244	0.00374873	0.0912191	-1.73113
Cytip	-0.272437	8.50935	-3.39079	0.00376178	0.0912549	-2.43442
Adpgk	-0.817451	4.69805	-3.38547	0.00380409	0.0919984	-1.75008
Gna15	0.628412	7.02583	3.37512	0.00388784	0.0936645	-2.01758
Sec16a	-0.679676	5.83829	-3.3734	0.00390192	0.0936645	-1.89299
Rere	-0.805691	5.02519	-3.37191	0.00391422	0.0936645	-1.7976
Prex1	0.60759	8.13722	3.36944	0.00393458	0.0936645	-2.29454
Fam111a	-0.687258	5.37637	-3.36904	0.00393789	0.0936645	-1.83064
Dnajc9	0.705657	6.87098	3.36827	0.00394427	0.0936645	-1.98731
Rrp15	-1.15539	3.63708	-3.36513	0.0039704	0.0940019	-1.79746
Arpc5	0.261779	8.85015	3.36134	0.00400215	0.0944699	-2.52486
Anxa6	0.228794	9.31992	3.35628	0.00404502	0.0951968	-2.64381
Ptprc	0.171062	10.7038	3.35267	0.00407582	0.0954385	-2.92665
Ccni	0.397272	7.62463	3.35224	0.0040795	0.0954385	-2.22042
Tstd3	1.00601	4.81204	3.34328	0.00415711	0.0967036	-1.82376
Golim4	0.616079	6.24583	3.34316	0.00415811	0.0967036	-1.92203
Mrpl38	-0.684734	5.86189	-3.34115	0.00417572	0.0968276	-1.96849
D3Ertd751e	-0.879032	4.59533	-3.33531	0.0042273	0.0977361	-1.84123
Snx5	0.479526	8.30325	3.32418	0.00432742	0.0997585	-2.44173
Tfdp1	1.26266	3.8873	3.31399	0.0044211	0.101621	-1.954
Tsr3	-0.529034	6.00771	-3.31145	0.00444471	0.101867	-2.03243
Rpl7a	0.240161	9.86512	3.30335	0.00452101	0.103065	-2.86777
Nfkbiz	-0.690604	6.04601	-3.30137	0.00453989	0.103065	-2.07557
Smyd1	1.22181	5.13551	3.30075	0.00454577	0.103065	-1.89498
Urb1	-1.29099	3.29862	-3.29871	0.00456532	0.103065	-1.9294
Rapgef6	-0.352681	7.36405	-3.29855	0.00456682	0.103065	-2.35171
Pltp	-1.52003	4.18091	-3.29765	0.00457545	0.103065	-1.9043
Trmt13	1.28248	3.82549	3.29506	0.00460039	0.103291	-1.98603
Slc25a45	1.17006	5.03579	3.2939	0.00461167	0.103291	-1.9072
Nkg7	0.257082	12.0015	3.29121	0.00463774	0.103581	-3.25664
Btf3	0.196098	9.6223	3.28788	0.00467038	0.103677	-2.85577
Fam98b	-0.577594	5.58118	-3.28637	0.00468515	0.103677	-2.01167
Clcf1	-0.706889	5.8842	-3.28549	0.00469387	0.103677	-2.0794
Sp4	-0.639907	5.88559	-3.28541	0.00469465	0.103677	-2.07211
Ipo8	-0.746318	5.14784	-3.28328	0.00471563	0.103849	-1.97365
Trap1	-0.593323	5.69533	-3.2722	0.00482666	0.105846	-2.05456
Sipa1l1	-0.739293	4.78992	-3.27156	0.00483315	0.105846	-1.9636
U2af2	-0.36184	7.24333	-3.26871	0.00486222	0.106188	-2.38
Xbp1	-0.652447	5.7139	-3.26596	0.00489031	0.106506	-2.07978
Rps13	0.185281	11.6326	3.2633	0.0049177	0.106808	-3.25827
Mrps27	-1.13268	3.37702	-3.26193	0.00493185	0.106821	-1.98524
Paf1	-0.481755	6.44647	-3.26022	0.00494964	0.106912	-2.21836
Rbm8a	-0.398109	6.51232	-3.25039	0.00505276	0.108842	-2.24971
Timm10	-0.803819	4.31718	-3.24646	0.00509459	0.109444	-1.99224
Slc12a7	-0.651508	5.24632	-3.24226	0.00513968	0.110112	-2.05917
Vasp	0.380343	8.2979	3.23978	0.00516657	0.110388	-2.62167
Arf5	0.342493	8.40122	3.23743	0.00519205	0.110421	-2.65864
Hes6	0.808706	5.54761	3.23706	0.00519614	0.110421	-2.03169
Rpl22l1	0.342113	8.93704	3.23439	0.00522526	0.110742	-2.80184
Tex261	0.42369	6.59482	3.22872	0.00528786	0.111397	-2.22869
Eri2	-1.01228	4.11716	-3.22819	0.00529372	0.111397	-2.02395
Ccdc92	-1.10463	3.96973	-3.22775	0.00529859	0.111397	-2.02426
Mmgt2	0.782069	6.19683	3.22511	0.00532802	0.111432	-2.1325
Gpr65	-0.90002	5.00306	-3.22457	0.00533401	0.111432	-2.0773
Cd3e	0.225101	10.5686	3.22348	0.00534623	0.111432	-3.16892
Wdr1	0.239611	8.48322	3.22033	0.00538164	0.111432	-2.72534
Irf2bp2	-0.843751	5.1844	-3.21904	0.00539627	0.111432	-2.10527
Myo1f	0.317218	8.21114	3.21896	0.00539716	0.111432	-2.64949
Adgre5	-0.256792	8.91767	-3.21786	0.00540963	0.111432	-2.88025
Ralgapa2	0.628207	6.01575	3.21754	0.0054133	0.111432	-2.12779
Nipal3	0.550821	6.25567	3.21603	0.00543046	0.111494	-2.17268
Gnptab	-0.483523	6.82017	-3.21464	0.00544628	0.111505	-2.40303
Nr2c2ap	-0.549471	5.79402	-3.2135	0.00545929	0.111505	-2.18897
Rps6kb2	-0.556625	5.3591	-3.21039	0.00549506	0.111946	-2.12363
Fkbp10	1.64527	3.00436	3.20905	0.00551045	0.11197	-2.22446
Fxyd7	3.34961	5.87514	3.20669	0.00553787	0.112032	-2.06164
Trib1	-1.29439	3.03893	-3.20634	0.00554193	0.112032	-2.10486
Hipk2	-1.12493	3.07065	-3.2019	0.00559374	0.11279	-2.10458
Ythdc1	-0.373862	7.60356	-3.19779	0.00564215	0.113476	-2.61014
Bscl2	0.588249	7.05537	3.194	0.00568706	0.114088	-2.39023
Ylpm1	-0.475855	6.17012	-3.1895	0.00574099	0.114652	-2.30474
Tuba1a	-0.551744	8.02241	-3.18923	0.00574422	0.114652	-2.76175
Abca2	-0.507928	5.9601	-3.18384	0.0058094	0.11566	-2.27757
Lamtor2	-0.299338	7.69868	-3.17717	0.00589119	0.116993	-2.67845
Cdkn2aipnl	-0.389257	6.86419	-3.17253	0.0059487	0.117838	-2.48623
Zfp408	-0.76247	4.57525	-3.17058	0.00597308	0.118024	-2.13865
Trim28	-0.517317	6.62912	-3.16808	0.00600443	0.118297	-2.44793
Plekha1	-0.847015	4.07292	-3.16687	0.00601966	0.118297	-2.13113
Gstp1	-0.295106	8.24173	-3.1659	0.0060319	0.118297	-2.83374
Fkbp3	-0.374988	7.51104	-3.16075	0.00609729	0.119283	-2.67224
Ctsb	0.45194	7.41655	3.15758	0.00613787	0.119777	-2.56555
Hsf1	-0.470456	6.51857	-3.15532	0.006167	0.119777	-2.45331
Gbe1	-1.26117	3.51744	-3.15523	0.0061681	0.119777	-2.15648
Rpl10	-0.227577	9.8132	-3.1506	0.00622822	0.120647	-3.2052
Trmt10c	-0.519531	5.71483	-3.14898	0.00624938	0.12076	-2.2941
Ciao1	-0.723054	5.22688	-3.14598	0.00628871	0.12078	-2.24357
Mki67	1.26328	4.81515	3.14558	0.00629399	0.12078	-2.17013
Ptges3	-0.410498	7.69869	-3.1454	0.0062964	0.12078	-2.74554
Fam104a	-0.391936	6.70203	-3.14371	0.00631867	0.120914	-2.50884
Crebl2	-0.850005	4.22615	-3.14229	0.00633747	0.12098	-2.17727
Nrbp1	-0.345568	7.16556	-3.14109	0.00635336	0.12099	-2.62001
Dennd4a	-0.515049	6.01501	-3.13204	0.00647479	0.122896	-2.39468
Kcnj8	-0.434435	8.58686	-3.13132	0.0064846	0.122896	-2.99928
Pphln1	-0.691391	4.9982	-3.13011	0.00650098	0.122911	-2.23747
Elovl7	1.17221	4.60674	3.12652	0.00654999	0.123462	-2.20489
Eif4a1	-0.352616	7.81152	-3.12568	0.00656146	0.123462	-2.81062
Esm1	0.959772	6.58716	3.12324	0.00659506	0.123799	-2.38535
Rilpl2	0.524522	6.20128	3.12206	0.00661144	0.123811	-2.34256
Cox4i1	0.247188	9.49485	3.11562	0.00670099	0.124858	-3.17511
Tnk2	-0.768254	4.40622	-3.11485	0.00671176	0.124858	-2.23109
Map1lc3b	0.301345	8.02817	3.11371	0.00672785	0.124858	-2.82136
Prpf3	-0.613958	5.4184	-3.11212	0.00675027	0.124858	-2.32116
Epc1	-0.331993	7.29804	-3.11209	0.00675062	0.124858	-2.7038
Dynll2	-0.618283	5.71007	-3.11126	0.00676236	0.124858	-2.36524
Ap1g1	0.762781	5.125	3.09332	0.00702058	0.129221	-2.27175
Abracl	0.311864	9.08128	3.09259	0.00703142	0.129221	-3.12686
Itgb7	0.313362	9.79714	3.09034	0.00706451	0.12948	-3.28784
Zfp825	1.5669	2.86109	3.0894	0.00707838	0.12948	-2.40294
Oxld1	-0.88628	4.02978	-3.08247	0.00718156	0.131023	-2.27912
Atad3a	-0.823291	4.12506	-3.08151	0.00719597	0.131023	-2.28109
Rora	0.729262	7.48173	3.07856	0.00724034	0.131527	-2.71551
Ap1s2	0.711573	6.16481	3.07647	0.00727213	0.131801	-2.40695
Nsmaf	0.454653	6.80597	3.07219	0.0073373	0.132677	-2.58114
Lmnb1	0.479761	6.80223	3.07043	0.00736439	0.132862	-2.58445
Prss12	-1.62931	3.37783	-3.06685	0.00741951	0.133551	-2.30857
P2ry10	-0.886306	3.75106	-3.06357	0.00747044	0.134162	-2.31063
Ppia	-0.114603	11.4126	-3.05854	0.00754933	0.135094	-3.65805
Rab3gap1	-0.5226	5.78554	-3.05808	0.0075566	0.135094	-2.47965
Rap1a	0.271022	7.92764	3.05364	0.00762689	0.136042	-2.92069
Lonp1	-0.608687	5.43221	-3.04604	0.00774867	0.137902	-2.45042
Ntan1	0.621315	6.54926	3.03697	0.0078966	0.140218	-2.57267
Hsp90ab1	-0.337496	10.5734	-3.03239	0.0079723	0.141244	-3.58789
Rnf166	0.25988	8.21987	3.03049	0.00800389	0.141486	-3.03884
Psip1	-0.257085	8.19277	-3.02822	0.00804187	0.141839	-3.09408
Rpn2	-0.308938	7.34427	-3.02183	0.00814972	0.143421	-2.89727
Rpl6	0.230797	10.0771	3.02018	0.00817772	0.143485	-3.49226
Nus1	-0.534028	5.70907	-3.01848	0.00820667	0.143485	-2.54812
Myo1c	-0.923489	4.07975	-3.0172	0.00822859	0.143485	-2.39468
Dapk2	0.634409	6.79606	3.01695	0.00823285	0.143485	-2.66019
Zfp292	-0.301546	7.24799	-3.01547	0.00825833	0.143485	-2.88591
Dhx30	-0.467254	5.99664	-3.01522	0.00826256	0.143485	-2.61032
Snhg4	1.64626	3.70769	3.0092	0.00836694	0.144803	-2.45635
Gm5141	-0.983752	3.7617	-3.00872	0.00837521	0.144803	-2.40452
Arid4b	-0.355707	7.02177	-3.0039	0.00845973	0.145813	-2.85767
Kif5c	1.38189	2.21575	3.00328	0.00847063	0.145813	-2.53734
Sfpq	-0.341802	8.24153	-3.00008	0.00852727	0.146468	-3.1696
Cdc25b	0.553324	6.87218	2.99703	0.00858155	0.14708	-2.72199
Rps7	0.242309	11.0844	2.99266	0.00865981	0.1481	-3.72367
Krcc1	-0.436457	6.46633	-2.99051	0.00869863	0.148442	-2.76069
Sptssa	-0.339903	6.78789	-2.98619	0.00877712	0.149458	-2.83059
Ifnar2	-0.471773	6.97797	-2.98408	0.00881579	0.149792	-2.90001
Timm9	-0.793296	4.32697	-2.98217	0.00885082	0.150064	-2.4656
2610008E11Rik	-0.738425	4.63646	-2.97737	0.00893958	0.151244	-2.49386
Setd4	-0.638377	4.78803	-2.97593	0.0089664	0.151373	-2.50421
Rac2	0.179824	11.1075	2.97472	0.008989	0.15143	-3.7666
Pbrm1	0.419658	6.9222	2.97154	0.00904856	0.152108	-2.80961
Mrps18b	-0.827545	4.41281	-2.96789	0.00911743	0.15294	-2.49868
Nabp2	0.581637	6.08909	2.96202	0.00922938	0.154489	-2.62637
Ddx60	-1.00337	3.29501	-2.95807	0.00930547	0.155433	-2.49569
Chaf1b	1.35399	3.67597	2.9564	0.00933767	0.155641	-2.52925
Ap2s1	0.336807	7.0702	2.95511	0.00936276	0.15573	-2.89065
Mylip	-0.483598	7.4377	-2.95315	0.00940095	0.156036	-3.06363
Clec2i	-1.25256	3.86045	-2.95115	0.00944002	0.156232	-2.50539
Pprc1	-0.966157	3.6676	-2.95009	0.00946095	0.156232	-2.50373
Med31	-0.939183	4.41557	-2.94851	0.00949198	0.156232	-2.53112
Tbc1d12	-0.928354	3.38346	-2.9485	0.00949205	0.156232	-2.50905
Rps23	0.231022	11.1498	2.94686	0.00952451	0.15644	-3.82648
Cdkn1a	-1.29564	2.51505	-2.94495	0.00956229	0.156734	-2.55324
Aacs	-0.878533	3.91487	-2.94031	0.00965494	0.157779	-2.52244
Notch1	-0.571651	5.95214	-2.93975	0.00966604	0.157779	-2.74618
Map4k1	0.503503	6.48651	2.93562	0.00974929	0.158408	-2.76269
Arpc2	0.196384	10.2593	2.93531	0.00975554	0.158408	-3.69966
Crip1	0.339464	10.3688	2.93485	0.0097649	0.158408	-3.7138
Camsap2	-0.762152	4.41232	-2.93244	0.00981381	0.158562	-2.55593
Il10ra	-0.297562	7.28314	-2.9324	0.00981458	0.158562	-3.05683
mt-Nd1	-0.253904	9.47567	-2.93111	0.0098409	0.158662	-3.5843
Fau	0.185985	12.2294	2.92766	0.00991154	0.159021	-4.04072
Mrps33	-0.397491	6.54414	-2.92635	0.00993848	0.159021	-2.90043
Hnrnph1	-0.486675	6.40467	-2.92634	0.00993881	0.159021	-2.8714
Hnrnpr	-0.356302	7.04328	-2.92609	0.00994385	0.159021	-3.01442
Bicra	-0.776985	5.57808	-2.92453	0.0099761	0.159214	-2.71392
Mfsd6	-0.782319	5.24785	-2.92231	0.0100221	0.159578	-2.66777
Ddx20	-0.62767	4.89748	-2.92148	0.0100394	0.159578	-2.61099
Cux1	-0.600108	5.11812	-2.91771	0.0101181	0.160505	-2.64446
Ndufaf4	-0.723421	4.94829	-2.91501	0.0101749	0.161082	-2.63656
Stub1	-0.410072	6.90153	-2.9139	0.0101984	0.161131	-3.00221
Smad7	-0.456002	6.59031	-2.90692	0.0103469	0.162808	-2.96157
Bmp2k	1.45297	3.68732	2.90627	0.0103608	0.162808	-2.61301
Fhl2	1.11359	4.78753	2.906	0.0103665	0.162808	-2.582
Cks2	0.843553	5.89914	2.90503	0.0103875	0.162814	-2.6892
Mbd4	-0.964313	3.49981	-2.90068	0.0104814	0.16396	-2.58678
Zfp414	1.2133	4.32078	2.89934	0.0105106	0.16409	-2.58977
Ppie	-0.650326	5.16909	-2.89637	0.0105753	0.164775	-2.69288
Akr1a1	0.286695	7.45387	2.89413	0.0106244	0.165213	-3.10855
Nap1l1	0.479404	6.84262	2.89262	0.0106579	0.165407	-2.94414
Ell2	-0.848124	4.79676	-2.88914	0.0107349	0.165821	-2.67387
Mat2a	-0.406342	7.2761	-2.8888	0.0107424	0.165821	-3.15826
Anxa2	-0.540305	7.58102	-2.88856	0.0107477	0.165821	-3.24187
Rbm39	-0.203944	9.85924	-2.88332	0.0108648	0.16695	-3.7566
Selplg	0.186946	10.8704	2.88319	0.0108678	0.16695	-3.91176
Adgrg5	-2.29132	3.63299	-2.88245	0.0108844	0.16695	-2.62572
1700037C18Rik	1.16605	3.94495	2.87822	0.0109801	0.168092	-2.63611
H1f0	-0.592185	5.89158	-2.87724	0.0110024	0.168107	-2.85754
Zfp607a	-0.741676	4.21901	-2.87613	0.0110276	0.168165	-2.64212
Mat2b	0.314275	7.571	2.87276	0.0111048	0.168886	-3.17972
Mrps28	-0.739563	4.36262	-2.8722	0.0111177	0.168886	-2.66002
Ndufs7	-0.314358	7.38022	-2.86955	0.0111786	0.169485	-3.20636
Spr	-0.497465	6.13718	-2.86842	0.0112049	0.169558	-2.92434
Lrrfip1	0.341747	8.27761	2.86571	0.0112678	0.170182	-3.37102
Aph1a	0.446005	6.51082	2.86403	0.0113071	0.170449	-2.9093
Smc5	-0.474734	5.95468	-2.85879	0.0114299	0.171973	-2.89628
Mtmr1	0.589461	5.253	2.85502	0.0115194	0.172988	-2.7137
Ccar2	-0.742974	5.11271	-2.85242	0.0115814	0.173324	-2.76867
B4galt1	-0.306186	7.12687	-2.85224	0.0115857	0.173324	-3.17767
Ppib	0.236972	8.69439	2.84896	0.0116645	0.173971	-3.52226
Marf1	0.687054	5.55082	2.8486	0.0116731	0.173971	-2.75036
Pold4	0.666359	5.95225	2.84632	0.0117282	0.174148	-2.80981
Actr3	0.179742	9.65112	2.8459	0.0117384	0.174148	-3.75854
Lpcat1	1.41981	4.09844	2.84537	0.0117512	0.174148	-2.68539
Casp7	0.749181	5.21956	2.84011	0.0118794	0.175717	-2.73002
Sirt2	0.44315	6.58718	2.83734	0.0119474	0.175898	-2.98298
Prkcq	-0.262802	8.13507	-2.83699	0.0119561	0.175898	-3.45832
Swi5	-0.339812	7.28241	-2.83689	0.0119586	0.175898	-3.24053
Banf1	-0.278019	7.42224	-2.83491	0.0120076	0.176175	-3.28236
Fam149b	0.870298	4.76347	2.83394	0.0120315	0.176175	-2.70942
Rpia	-0.435913	6.02313	-2.83342	0.0120445	0.176175	-2.95895
Ak3	0.503414	6.45076	2.82823	0.0121741	0.177476	-2.96044
Prpf40a	0.336938	7.04967	2.82806	0.0121784	0.177476	-3.13109
Nek9	-0.521414	5.25613	-2.82388	0.0122837	0.178559	-2.83229
Aqp9	-1.15059	3.43525	-2.82268	0.0123142	0.178559	-2.716
Selenoo	0.871442	5.37581	2.82222	0.0123259	0.178559	-2.7741
Cd69	-0.697062	5.83673	-2.82129	0.0123496	0.178559	-2.96257
Msra	-0.78361	3.94272	-2.82065	0.0123659	0.178559	-2.72652
Plekho1	1.48729	3.46487	2.81822	0.0124278	0.178689	-2.75717
Ppp1r37	-0.510744	5.49357	-2.81749	0.0124468	0.178689	-2.88666
Creb3	-0.508055	5.84558	-2.81487	0.0125139	0.178689	-2.95072
Tnfaip8l2	-0.294462	7.4627	-2.8147	0.0125184	0.178689	-3.33303
Ap1b1	-0.429677	6.34768	-2.81397	0.0125373	0.178689	-3.06982
Prpf6	-0.497005	6.3512	-2.81392	0.0125385	0.178689	-3.08351
Adsl	-0.485045	5.80149	-2.81344	0.0125508	0.178689	-2.94459
Poc5	-0.742069	4.49704	-2.81263	0.0125718	0.178689	-2.77495
Nfkbid	-0.494934	5.85659	-2.81236	0.0125789	0.178689	-2.96592
Psme2	-0.23273	8.32997	-2.80806	0.0126908	0.179954	-3.56247
Dnajc3	-0.283539	7.62918	-2.80594	0.0127464	0.180393	-3.3889
Arpc5l	0.340365	7.5125	2.80513	0.0127676	0.180393	-3.29127
Ass1	-1.29942	3.8134	-2.80296	0.0128247	0.180722	-2.7588
Paxip1	-0.532572	5.07266	-2.80251	0.0128367	0.180722	-2.84575
Mdc1	-0.539727	5.52174	-2.8013	0.0128686	0.180849	-2.91342
Zscan21	-0.709258	4.25937	-2.79845	0.0129443	0.181589	-2.78214
Actn4	-0.256159	7.40079	-2.79685	0.0129872	0.181866	-3.34715
Numa1	-0.403152	7.3377	-2.79242	0.0131058	0.182863	-3.35584
Rab39b	1.41661	2.19553	2.79233	0.0131083	0.182863	-2.8378
Gnl2	-0.502245	5.55078	-2.79161	0.0131279	0.182863	-2.93541
Ifi35	-0.361168	6.37844	-2.78696	0.0132539	0.184292	-3.11673
Cbx7	-0.492181	5.93552	-2.7815	0.0134036	0.18568	-3.04282
Alg1	-0.642319	5.39883	-2.78077	0.0134238	0.18568	-2.94587
Atp2a3	0.260642	8.33153	2.78075	0.0134244	0.18568	-3.56269
Smndc1	-0.277149	7.56831	-2.77724	0.0135216	0.186521	-3.43499
Gmeb2	-0.81299	4.62569	-2.77684	0.0135325	0.186521	-2.84585
Gnpda1	0.725525	5.51235	2.77346	0.013627	0.186881	-2.8731
Abcg3	-0.713098	4.07362	-2.77313	0.0136363	0.186881	-2.80984
Man2b1	0.362403	7.20742	2.77228	0.0136599	0.186881	-3.27322
Cul2	-0.670231	4.90463	-2.77193	0.0136697	0.186881	-2.88869
Mxd1	-0.528981	5.25885	-2.77167	0.0136771	0.186881	-2.92198
Prkcsh	0.81197	5.16195	2.76967	0.0137333	0.187325	-2.84529
Capzb	0.241406	9.07428	2.76498	0.0138663	0.188812	-3.78012
Itm2b	0.20968	10.3122	2.7636	0.0139057	0.188923	-4.05378
Epc2	-0.496945	5.68445	-2.76301	0.0139224	0.188923	-3.01582
Taf10	0.309553	8.20576	2.76131	0.0139713	0.189261	-3.56153
Morc2a	-0.752807	3.78226	-2.75477	0.0141599	0.19059	-2.83098
Csde1	-0.324012	7.37787	-2.75303	0.0142106	0.19059	-3.42904
Cdc42ep4	1.47497	2.24671	2.75261	0.0142228	0.19059	-2.89326
Rpl9	0.135727	11.6057	2.75204	0.0142395	0.19059	-4.2923
Polg	-0.596695	5.23945	-2.75199	0.0142411	0.19059	-2.96391
Gzmk	0.633309	9.15576	2.75177	0.0142475	0.19059	-3.78757
Dimt1	-0.703349	4.48585	-2.75137	0.0142592	0.19059	-2.8776
Zbtb11	-0.670957	5.74398	-2.75124	0.0142628	0.19059	-3.07095
Epsti1	-0.190846	9.26195	-2.7461	0.0144142	0.192286	-3.90069
Tmem109	-0.43302	6.20234	-2.74408	0.014474	0.192758	-3.17253
Mrpl22	-0.458938	5.51823	-2.7382	0.0146494	0.194766	-3.02553
Tomm20	0.351894	7.16515	2.73328	0.014798	0.196409	-3.33984
Icam1	0.33869	6.81659	2.73112	0.0148634	0.196413	-3.25188
Cpsf6	-0.442104	6.55233	-2.72935	0.0149174	0.196413	-3.28127
Abcf3	-0.639994	5.32167	-2.72885	0.0149328	0.196413	-3.018
Acox3	-0.567962	4.80885	-2.72828	0.0149503	0.196413	-2.94533
Tspan13	-1.41044	4.17038	-2.72786	0.0149632	0.196413	-2.91524
Sh2d2a	-0.296684	8.32304	-2.72743	0.0149764	0.196413	-3.72558
Atrx	0.38507	7.66848	2.727	0.0149895	0.196413	-3.48288
Stk24	0.319259	8.37147	2.72511	0.0150477	0.196413	-3.68099
Exosc7	-0.380209	6.07627	-2.72496	0.0150521	0.196413	-3.16387
Zfp646	-0.752432	4.46281	-2.72455	0.0150648	0.196413	-2.92458
Nosip	-0.417376	6.23997	-2.72431	0.0150723	0.196413	-3.21111
Ttc19	-0.584905	4.78053	-2.7203	0.0151964	0.19729	-2.95948
Kars	0.707482	5.29767	2.7199	0.015209	0.19729	-2.95313
Cfdp1	-0.388485	6.63712	-2.71912	0.0152332	0.19729	-3.30566
Skil	-0.718628	4.49496	-2.71879	0.0152436	0.19729	-2.93678
Nop56	-0.41985	6.31557	-2.71811	0.0152647	0.19729	-3.24566
Dedd2	-0.666253	5.01899	-2.71723	0.0152922	0.197322	-2.9891
Tprgl	0.214936	8.53353	2.71612	0.0153271	0.197383	-3.75092
Txnrd1	0.498971	6.46547	2.7146	0.0153747	0.197383	-3.17838
Sit1	-0.653575	5.35811	-2.71392	0.0153962	0.197383	-3.06285
Hspa8	0.376757	10.6425	2.71389	0.015397	0.197383	-4.19576
Samd3	-1.09992	5.04011	-2.71271	0.0154343	0.197539	-3.03568
Zfp961	-0.762579	4.12626	-2.70666	0.0156264	0.199645	-2.92849
Wdr95	0.540318	7.39027	2.70576	0.0156553	0.199645	-3.43228
S100a11	0.472158	8.68733	2.70278	0.0157508	0.199645	-3.7932
Rpap1	0.880277	3.78522	2.70276	0.0157517	0.199645	-2.91265
Mrps21	0.433653	6.87811	2.70272	0.0157529	0.199645	-3.31738
Ash2l	-0.44667	5.54327	-2.70084	0.0158135	0.199645	-3.09893
Dennd2d	-0.732876	4.42451	-2.70058	0.0158218	0.199645	-2.96022
Phf11b	0.375574	7.2707	2.7003	0.0158311	0.199645	-3.4208
Ruvbl2	-0.631999	5.08647	-2.69973	0.0158494	0.199645	-3.03464
Il2ra	-0.663823	4.7202	-2.69956	0.015855	0.199645	-2.98837
Smc1a	-0.302054	7.14252	-2.69887	0.0158774	0.199645	-3.47088
Med22	-0.687405	4.04225	-2.69694	0.0159401	0.200114	-2.94056
Rrp1	-0.263524	7.29045	-2.69572	0.0159798	0.200293	-3.51266
Polr1d	0.25461	7.93861	2.69192	0.0161043	0.201325	-3.6341
Arpc4	0.278648	8.49762	2.69127	0.0161258	0.201325	-3.77915
Fry	1.27707	3.61169	2.69088	0.0161387	0.201325	-2.9379
Rps6ka1	0.315002	7.33688	2.68901	0.0162005	0.201556	-3.47525
Camsap1	-0.92764	3.81557	-2.68877	0.0162083	0.201556	-2.94547
Rffl	-0.866628	3.55241	-2.68795	0.0162355	0.201576	-2.93673
Mfsd14b	0.542817	6.49602	2.68429	0.0163571	0.202766	-3.23766
Il18r1	-0.473035	7.78348	-2.68022	0.0164938	0.20414	-3.70042
Rps2	-0.168166	10.7756	-2.67552	0.0166526	0.205783	-4.32469
Cd72	-1.7373	3.77453	-2.67329	0.0167285	0.206396	-2.97999
Srm	-0.897263	3.90478	-2.67008	0.0168383	0.206941	-2.97902
Pag1	0.359257	7.00116	2.66999	0.0168415	0.206941	-3.42204
Lztfl1	-0.75723	3.94581	-2.6697	0.0168513	0.206941	-2.982
Mov10	-0.832154	4.1165	-2.66773	0.0169192	0.207451	-2.99532
Eif3k	0.285662	8.29253	2.66363	0.0170611	0.208637	-3.77575
Ctnnbip1	1.77357	4.47063	2.66341	0.0170688	0.208637	-2.97382
Golga2	-0.599279	5.42155	-2.6594	0.0172089	0.210024	-3.16048
Mrto4	-0.606418	4.74882	-2.65851	0.0172403	0.210081	-3.06743
Rpl23	0.226535	11.2859	2.65442	0.0173844	0.21151	-4.42894
Arih1	-0.321282	6.90632	-2.65248	0.0174531	0.212018	-3.50218
Armt1	-0.566675	4.48449	-2.65164	0.0174829	0.212054	-3.04783
Ccl6	-1.10154	2.45329	-2.6488	0.0175845	0.212722	-3.01092
Pik3cd	-0.324189	8.30195	-2.64859	0.0175919	0.212722	-3.88202
Timm13	-0.27616	7.12843	-2.64696	0.0176504	0.212886	-3.56872
Elovl5	-0.508752	5.53749	-2.6467	0.0176595	0.212886	-3.19487
Eef1b2	0.203046	9.62692	2.64525	0.0177118	0.21303	-4.14495
Taf15	-0.28419	7.39058	-2.64414	0.017752	0.21303	-3.64518
Filip1l	-1.51106	2.60667	-2.64412	0.0177525	0.21303	-3.01002
Xpo4	-0.698316	4.25052	-2.64143	0.01785	0.213874	-3.04619
Nudc	-0.351146	6.77641	-2.64061	0.0178799	0.213908	-3.49687
Dgka	-0.286198	7.61824	-2.63856	0.0179544	0.214474	-3.71698
Mrps22	-0.883657	3.78531	-2.6346	0.0180999	0.215578	-3.03629
Snw1	-0.318055	7.12625	-2.63455	0.0181015	0.215578	-3.5862
Tlk1	0.316772	6.73713	2.631	0.0182327	0.216254	-3.42577
Zc3h8	-0.859818	3.28114	-2.63032	0.0182579	0.216254	-3.02584
Ivd	-0.642591	4.91933	-2.6274	0.0183666	0.216254	-3.13702
Gpr146	-0.868982	4.15669	-2.62736	0.0183681	0.216254	-3.07089
Zfp790	-0.775314	3.9888	-2.62687	0.0183862	0.216254	-3.05495
Rap2a	-0.317776	7.45295	-2.62687	0.0183865	0.216254	-3.70191
Sgsm2	-0.87516	3.30484	-2.62677	0.01839	0.216254	-3.03246
Rpain	-0.647642	4.56793	-2.6263	0.0184075	0.216254	-3.09865
Bloc1s5	-0.758209	3.84145	-2.62501	0.018456	0.216254	-3.05135
Abi3	-0.652962	5.24262	-2.62443	0.0184776	0.216254	-3.19539
Man2b2	0.593271	5.47763	2.62441	0.0184785	0.216254	-3.14569
Cct3	-0.453865	6.45846	-2.62387	0.0184988	0.216254	-3.46467
Phf21b	-0.72376	4.18118	-2.62344	0.0185149	0.216254	-3.07188
Sun2	-0.220546	7.85107	-2.62266	0.0185444	0.216257	-3.79813
Myo1g	0.296537	7.89714	2.62198	0.01857	0.216257	-3.75258
Ppan	-0.602781	5.28491	-2.62	0.0186447	0.216806	-3.20971
Mkrn1	0.428434	7.54324	2.61844	0.0187038	0.216835	-3.64782
Sin3b	0.336222	7.22697	2.61701	0.0187582	0.216835	-3.58473
Atp2b1	0.275518	8.10327	2.61667	0.018771	0.216835	-3.82644
Tmbim6	-0.160968	9.18554	-2.61513	0.0188297	0.216835	-4.13556
Gpn3	-0.474078	5.56542	-2.61469	0.0188467	0.216835	-3.26278
Smap1	0.244055	8.0116	2.61468	0.0188471	0.216835	-3.80234
Ankrd11	-0.242329	8.85946	-2.61451	0.0188536	0.216835	-4.07499
Sdf2	0.393761	6.40731	2.61291	0.0189149	0.216835	-3.37179
Eloa	0.442168	6.1035	2.61282	0.0189183	0.216835	-3.29636
Cdk6	1.04864	4.35825	2.61272	0.0189222	0.216835	-3.05966
Smarcc2	-0.353683	6.76888	-2.60974	0.0190369	0.217833	-3.55388
Hnrnpdl	-0.277982	7.5417	-2.609	0.0190656	0.217846	-3.74575
Lnpep	0.298906	7.77485	2.6076	0.0191199	0.217966	-3.74699
Psma4	0.398152	6.53942	2.6073	0.0191314	0.217966	-3.41813
E2f2	0.634784	5.4419	2.60607	0.0191791	0.218193	-3.17327
Sh2b1	-0.349995	6.65585	-2.60237	0.0193236	0.219521	-3.53325
Ppp1cc	0.27278	7.86915	2.599	0.019456	0.220706	-3.79068
Pdia4	-0.353192	6.74401	-2.59774	0.019506	0.220956	-3.56632
Plekhb2	0.442726	6.03251	2.59671	0.0195467	0.221099	-3.30001
Cntrl	0.296686	7.47334	2.59551	0.0195943	0.221171	-3.68448
Pop5	-0.475484	5.84996	-2.59513	0.0196092	0.221171	-3.36526
Pinx1	-0.871188	4.25487	-2.59386	0.01966	0.221428	-3.13448
Mon1a	-0.53808	5.24799	-2.59197	0.0197353	0.221928	-3.25489
Snrnp48	-0.310249	6.69987	-2.59133	0.0197607	0.221928	-3.56821
Mphosph9	-0.815852	4.46894	-2.58868	0.0198673	0.222807	-3.1625
Mrpl34	0.471891	6.04713	2.58675	0.019945	0.223013	-3.32141
Vamp4	0.434749	6.69283	2.5861	0.0199713	0.223013	-3.47863
Galnt3	0.975495	5.14646	2.58542	0.0199987	0.223013	-3.16009
Saal1	-0.631076	4.94434	-2.58443	0.0200389	0.223013	-3.2227
Mesd	-0.729454	4.67795	-2.58403	0.0200552	0.223013	-3.18983
Adss	0.545116	5.87704	2.58402	0.0200553	0.223013	-3.28328
Stx16	-0.777309	4.11234	-2.58283	0.0201039	0.223238	-3.13453
Rnf126	-0.37383	6.52103	-2.58197	0.020139	0.223314	-3.54132
Lamtor5	0.370431	6.6777	2.57952	0.0202389	0.224106	-3.49852
Slc12a6	-0.491168	5.56016	-2.57774	0.0203121	0.224299	-3.31956
Pebp1	-0.384208	6.73206	-2.57771	0.0203132	0.224299	-3.60917
Hscb	0.695104	5.64352	2.57489	0.0204296	0.225269	-3.25175
Piga	-0.916223	4.05865	-2.57138	0.0205748	0.226553	-3.15568
Isyna1	-0.5428	5.73219	-2.56983	0.0206394	0.226948	-3.37968
Maf	1.36705	3.4488	2.56905	0.0206722	0.226992	-3.12638
Kcnk5	0.71085	5.79353	2.56781	0.020724	0.227205	-3.27831
Igbp1	0.594146	5.75314	2.5672	0.0207497	0.227205	-3.2892
Nsun6	-0.709499	4.80145	-2.56602	0.0207989	0.227205	-3.24334
Nup210	0.296693	7.27144	2.56583	0.020807	0.227205	-3.68645
Wdr12	-0.757926	4.00148	-2.56237	0.0209529	0.227385	-3.16533
Nop53	0.349781	7.30176	2.56235	0.0209539	0.227385	-3.68956
Usp31	-0.818548	3.64455	-2.56207	0.0209656	0.227385	-3.14422
Pdp1	-0.889558	3.89185	-2.5616	0.0209855	0.227385	-3.16508
Sf3b1	0.208697	8.82426	2.56002	0.0210528	0.227385	-4.11954
Haus7	-0.749475	4.21606	-2.55981	0.0210615	0.227385	-3.1856
Pip5k1c	-0.505163	5.78954	-2.55899	0.0210967	0.227385	-3.41964
Bcl9l	-0.340751	6.46283	-2.55865	0.0211109	0.227385	-3.56369
Tut1	-0.674904	4.91971	-2.55834	0.0211244	0.227385	-3.26564
Nsun2	-0.421055	5.96862	-2.55805	0.0211365	0.227385	-3.45519
Heatr3	-0.643276	4.13608	-2.55796	0.0211406	0.227385	-3.17698
Mettl23	0.258874	7.80376	2.5565	0.021203	0.227437	-3.85968
Hcls1	0.259992	8.22981	2.55649	0.0212032	0.227437	-3.97673
Usp36	-0.495898	5.53525	-2.55316	0.0213464	0.228661	-3.37143
Ppargc1b	-0.795706	3.69671	-2.55222	0.0213871	0.228786	-3.16288
Cdkn2c	0.805104	4.07932	2.55062	0.0214559	0.229212	-3.15339
Ppp1r10	-0.530947	6.09172	-2.54971	0.0214956	0.229325	-3.49763
Sri	0.235363	8.19701	2.54758	0.021588	0.229401	-3.98347
Slbp	-0.389819	7.15522	-2.54718	0.0216053	0.229401	-3.77133
Slamf7	0.394172	8.62307	2.54691	0.0216173	0.229401	-4.07176
Tpr	-0.17694	8.66748	-2.54588	0.0216621	0.229401	-4.15026
Cep76	1.06269	3.01365	2.54573	0.0216687	0.229401	-3.16945
Tuba1c	-0.528602	6.91881	-2.54553	0.0216773	0.229401	-3.73655
Mpc1	-0.386796	6.09526	-2.54206	0.0218295	0.230702	-3.50204
B4galnt1	-0.174481	9.10913	-2.53833	0.0219944	0.232017	-4.26841
Spn	0.192715	8.9964	2.53773	0.0220212	0.232017	-4.21032
Cdc25a	-0.842968	3.96067	-2.53725	0.0220422	0.232017	-3.20664
Sec22c	-1.0002	3.91277	-2.53538	0.0221257	0.232585	-3.20831
Fam110a	1.1766	2.98743	2.5338	0.0221962	0.232716	-3.18868
Faim	0.645515	5.4501	2.53378	0.0221972	0.232716	-3.3048
Dck	0.875421	3.71468	2.53279	0.0222412	0.232868	-3.17592
Ltv1	-0.743177	4.34607	-2.52958	0.0223856	0.234069	-3.24264
Mis12	-0.725594	4.63642	-2.52594	0.0225502	0.235478	-3.28436
Mllt6	-0.45805	5.89899	-2.52526	0.0225812	0.23549	-3.4948
Mtch1	0.401668	6.68664	2.52421	0.022629	0.235677	-3.60678
Slc30a1	-0.802131	4.12095	-2.51972	0.0228343	0.236777	-3.2485
Man2a1	0.372417	6.28651	2.51952	0.0228434	0.236777	-3.50723
Zpr1	-0.452637	5.9027	-2.51908	0.022864	0.236777	-3.49935
Pex14	-0.481364	5.21699	-2.51869	0.0228819	0.236777	-3.37072
Rhog	0.242299	8.26578	2.51862	0.0228848	0.236777	-4.05294
Zdhhc15	0.606661	5.36065	2.51743	0.0229399	0.236844	-3.31261
Rrm1	-0.570985	5.04849	-2.51718	0.0229514	0.236844	-3.35392
Cox8a	0.130296	9.99574	2.5133	0.0231311	0.238055	-4.48113
Gem	0.725177	7.41836	2.51326	0.0231327	0.238055	-3.77879
Mindy3	0.433915	6.11583	2.51215	0.0231846	0.238055	-3.47226
Rftn1	-0.780367	4.90514	-2.51204	0.0231895	0.238055	-3.35445
Runx2	0.33892	7.51233	2.50516	0.0235128	0.24106	-3.87025
Cycs	-0.494066	7.16562	-2.50242	0.0236425	0.242075	-3.8573
Psmc3	-0.301751	7.25283	-2.49888	0.0238112	0.243486	-3.87738
Qprt	-0.840962	3.7613	-2.49777	0.0238642	0.243711	-3.25814
Sh3gl1	-0.232263	7.77414	-2.49699	0.0239017	0.243725	-4.0131
Ppp2r3c	1.27178	3.73126	2.49645	0.0239274	0.243725	-3.23094
Npc2	0.292661	8.34502	2.49383	0.0240538	0.244697	-4.11674
Spag1	2.18865	2.93658	2.48897	0.0242892	0.246773	-3.25969
Qsox1	0.881906	4.57163	2.48538	0.0244647	0.247583	-3.27798
Ndufa12	-0.490963	5.86099	-2.48537	0.0244653	0.247583	-3.57602
Trp53	-0.377364	6.67174	-2.48427	0.0245193	0.247583	-3.75865
Pik3ip1	-0.563821	5.33519	-2.48423	0.0245211	0.247583	-3.45998
Mdm4	-0.300222	6.80359	-2.48355	0.0245545	0.247583	-3.78808
Cbr1	-0.441769	5.63425	-2.48341	0.0245614	0.247583	-3.51192
Dusp5	-0.350334	8.35018	-2.48286	0.0245887	0.247583	-4.20632
Sypl	0.621216	5.51716	2.4822	0.0246214	0.247596	-3.40112
Cdc42se1	-0.168557	8.69308	-2.48103	0.0246792	0.247861	-4.27809
Chic2	0.261674	7.37842	2.47894	0.0247828	0.248156	-3.88691
Arhgap45	-0.161351	10.0096	-2.47817	0.024821	0.248156	-4.57067
Rps17	-0.22542	8.29798	-2.47809	0.0248251	0.248156	-4.19057
Btg1	-0.179223	10.6446	-2.4779	0.0248345	0.248156	-4.68657
Atic	0.378194	6.50804	2.47622	0.0249178	0.248659	-3.64551
Slc27a4	0.910637	4.27672	2.47508	0.0249752	0.248659	-3.28224
Kat8	-0.559382	5.17529	-2.47499	0.0249794	0.248659	-3.44851
Rpl8	-0.16468	10.9686	-2.4718	0.0251397	0.249939	-4.74638
Adamts14	0.781826	5.23696	2.4711	0.0251747	0.249971	-3.36536
6330403K07Rik	1.60018	3.57124	2.46946	0.0252577	0.250281	-3.27397
Mturn	-0.660264	4.19593	-2.46923	0.0252694	0.250281	-3.33022
Slc9a8	-0.656253	4.6343	-2.4677	0.0253466	0.250731	-3.37879
Jup	1.18663	3.0672	2.46704	0.02538	0.250747	-3.28217
Osgin2	-0.684291	4.09643	-2.46476	0.0254965	0.251583	-3.32805
Fahd2a	1.22085	2.76417	2.46293	0.0255898	0.25185	-3.2946
Acadvl	-0.429426	5.50143	-2.46194	0.0256408	0.25185	-3.52034
Chp1	0.345006	6.62419	2.46101	0.0256883	0.25185	-3.70543
Tmem163	0.380278	7.21199	2.46055	0.0257121	0.25185	-3.85499
Zswim7	-0.94227	3.03109	-2.4594	0.0257709	0.25185	-3.28769
Aste1	-0.689005	4.00804	-2.45896	0.025794	0.25185	-3.3355
Rbck1	0.318924	7.55873	2.45888	0.025798	0.25185	-3.95642
Ubxn2a	-0.555712	5.74558	-2.45843	0.0258213	0.25185	-3.58773
Xab2	-0.347844	6.14404	-2.45813	0.0258368	0.25185	-3.67171
Nucb1	0.331984	6.89699	2.45789	0.0258492	0.25185	-3.78202
Klra9	-3.05534	3.2833	-2.45692	0.0258993	0.25185	-3.33367
Naa25	-0.705845	4.31955	-2.45677	0.0259069	0.25185	-3.36487
Cdc27	0.79141	4.66409	2.45615	0.0259393	0.251854	-3.33515
Cpne1	0.798352	4.92536	2.45548	0.0259741	0.251882	-3.36715
Gsn	1.04153	4.35649	2.45186	0.0261626	0.252895	-3.3116
Nudt4	0.701347	5.45682	2.45174	0.0261688	0.252895	-3.43846
Rgs19	-0.331062	7.04515	-2.45142	0.0261853	0.252895	-3.92125
Mcub	1.4404	3.6676	2.45062	0.0262274	0.252895	-3.29942
Ttl	-0.761819	3.3579	-2.4504	0.026239	0.252895	-3.31003
Edc4	-0.485276	5.35084	-2.44765	0.0263833	0.253975	-3.52191
Sbno2	-0.492313	5.14712	-2.44509	0.0265184	0.254897	-3.48162
Nfx1	-0.40965	6.07754	-2.4443	0.0265606	0.254897	-3.69531
Por	-0.457912	5.1734	-2.44341	0.0266078	0.254897	-3.49063
Polr2f	-0.355963	6.5369	-2.4434	0.0266083	0.254897	-3.80389
AU022252	-0.792408	3.81256	-2.44201	0.0266823	0.255295	-3.34814
Sgpp1	-0.506136	5.4386	-2.43987	0.0267963	0.256075	-3.55464
Rgs1	-0.516484	6.59863	-2.43768	0.0269136	0.256647	-3.86151
Thumpd1	-0.429597	5.71916	-2.43754	0.0269212	0.256647	-3.61278
mt-Co1	0.516116	12.1664	2.43626	0.0269903	0.256973	-4.97174
Slirp	-0.689981	5.10967	-2.43529	0.0270424	0.256973	-3.51985
Foxp1	-0.382284	7.77822	-2.43502	0.027057	0.256973	-4.15396
Ddx41	-0.427465	5.97079	-2.43448	0.0270859	0.256973	-3.68504
Ncapd3	-0.512697	5.40654	-2.43187	0.0272272	0.25786	-3.55731
Lasp1	0.337434	7.51434	2.43155	0.0272447	0.25786	-3.98629
Mmp25	1.88915	2.70314	2.43036	0.0273095	0.258163	-3.3416
Nt5c	0.321008	7.77075	2.42975	0.0273428	0.258163	-4.07586
Trim14	0.469484	6.04086	2.42879	0.0273948	0.258163	-3.60315
Srsf6	-0.275914	6.96169	-2.42856	0.0274077	0.258163	-3.9377
Zfp622	-0.307988	6.52164	-2.42787	0.0274455	0.25821	-3.82055
Tango6	-0.832976	3.18447	-2.42651	0.02752	0.258439	-3.34191
Trps1	1.28795	3.85405	2.42597	0.0275495	0.258439	-3.33856
Cetn3	-0.359319	6.26427	-2.42563	0.0275682	0.258439	-3.75798
Spout1	-0.788302	3.83705	-2.4244	0.0276359	0.25872	-3.37534
Phyh	0.6305	5.17456	2.42377	0.0276706	0.25872	-3.45367
Plekhg2	-0.707737	4.69317	-2.42329	0.0276966	0.25872	-3.47153
Tpgs2	0.640648	5.01229	2.42193	0.0277718	0.259116	-3.43685
H2-Q7	0.121753	10.9775	2.42134	0.0278046	0.259116	-4.82965
Ubac2	-0.37192	7.02772	-2.41892	0.0279388	0.259375	-3.96986
Lgals3bp	0.657141	6.10157	2.41887	0.0279417	0.259375	-3.61374
Ptdss1	0.459085	5.84068	2.41879	0.027946	0.259375	-3.58269
Sgcb	1.32581	3.6126	2.41847	0.0279641	0.259375	-3.347
Ocel1	0.770188	5.44491	2.41772	0.0280059	0.259458	-3.48749
Rpl10a	0.137424	10.4328	2.41605	0.0280989	0.259924	-4.74792
Carm1	-0.85683	4.08442	-2.41511	0.0281517	0.259924	-3.41386
Ugcg	0.363705	8.10791	2.41448	0.0281867	0.259924	-4.18054
Dvl2	-0.566918	4.94683	-2.41437	0.0281931	0.259924	-3.51272
Sumo3	-0.480719	5.693	-2.41387	0.0282211	0.259924	-3.64598
Nle1	-0.855239	3.64742	-2.41275	0.0282842	0.260202	-3.38542
Pgm2l1	0.73933	5.42334	2.41024	0.0284258	0.2612	-3.48971
Pus10	0.963335	3.4141	2.40928	0.0284802	0.261394	-3.36028
Cox6a1	-0.17637	8.37572	-2.40816	0.0285434	0.26167	-4.33774
1110059E24Rik	-0.576128	4.42805	-2.40694	0.0286125	0.261951	-3.45378
Rps12	0.130988	10.4736	2.40645	0.0286405	0.261951	-4.77248
Vps11	-0.43018	5.42242	-2.40532	0.0287053	0.26224	-3.59833
Hacd3	-0.629815	4.90573	-2.40467	0.0287422	0.262273	-3.53465
Rpl27	0.376856	10.5466	2.40077	0.0289658	0.263887	-4.78389
Unk	-0.652701	4.28731	-2.40042	0.028986	0.263887	-3.45331
Osm	-0.819069	3.84835	-2.39826	0.0291104	0.264699	-3.42384
Mr1	1.17549	2.95207	2.39771	0.0291424	0.264699	-3.38272
Atp13a1	-0.403698	5.90046	-2.39604	0.0292392	0.265217	-3.72206
E2f3	1.14988	2.5787	2.39516	0.0292905	0.265217	-3.39019
Zscan29	0.541675	5.22759	2.39499	0.0293004	0.265217	-3.51202
Bri3	0.384264	6.40766	2.39313	0.0294089	0.26566	-3.75613
Plekhf1	0.852328	4.30263	2.39277	0.0294299	0.26566	-3.40683
Madd	-0.32095	6.91715	-2.39241	0.0294504	0.26566	-3.98872
Mepce	-0.472046	5.31783	-2.3909	0.0295388	0.266153	-3.60447
Fbxw17	0.85305	3.05059	2.39032	0.0295732	0.266159	-3.38895
Rpa2	0.379279	7.49568	2.38887	0.029658	0.266423	-4.06038
Txn1	0.280589	7.88047	2.38867	0.0296701	0.266423	-4.18389
Kras	-0.345876	6.98168	-2.38525	0.0298723	0.267933	-4.02615
Fbl	-0.331462	6.31503	-2.38189	0.0300716	0.269414	-3.85237
Baiap3	0.213026	7.9614	2.38007	0.0301801	0.27008	-4.23596
Crybg1	-0.365758	7.13815	-2.37935	0.0302232	0.270159	-4.07942
Rasal3	-0.228426	8.57179	-2.37876	0.030259	0.270172	-4.44267
Nptn	0.205357	8.46546	2.37574	0.0304404	0.271246	-4.37451
Tanc1	1.22447	3.0434	2.37561	0.0304481	0.271246	-3.41134
Sdcbp	0.302959	7.4746	2.3748	0.0304969	0.271252	-4.10108
Cd82	0.249466	8.7352	2.3737	0.0305636	0.271252	-4.44415
Slc25a25	-0.655934	4.82648	-2.37345	0.0305787	0.271252	-3.57131
Ercc6l2	-0.777179	4.12459	-2.37333	0.0305864	0.271252	-3.49258
Arl6ip5	0.176184	9.35215	2.3723	0.0306486	0.271398	-4.60329
G3bp1	-0.240461	7.22245	-2.37155	0.0306943	0.271398	-4.10283
Alyref	-0.260251	7.22558	-2.37135	0.0307061	0.271398	-4.10681
Psmd5	-0.498061	5.41531	-2.36975	0.0308035	0.271741	-3.66168
2610021A01Rik	1.14896	3.09925	2.36925	0.0308339	0.271741	-3.41944
N6amt1	-0.720038	4.1411	-2.36864	0.0308711	0.271741	-3.49692
Apbb1ip	0.163864	9.44667	2.36774	0.0309263	0.271741	-4.63352
Insig1	1.07934	3.60673	2.36753	0.030939	0.271741	-3.42223
Abcf2	-0.500347	5.3716	-2.36733	0.0309517	0.271741	-3.66087
Sh3bgrl3	0.16911	10.3946	2.36634	0.0310122	0.271969	-4.83076
Oaz1	0.147908	10.1343	2.36537	0.031072	0.272191	-4.78427
Top2a	0.703553	4.90085	2.36378	0.0311699	0.272745	-3.52019
Rap1gap2	0.457367	6.46143	2.36318	0.0312069	0.272766	-3.80934
Rras2	-0.958909	4.52711	-2.36032	0.031384	0.274011	-3.56389
Apol7e	-0.588558	5.29878	-2.35941	0.0314401	0.274179	-3.66593
Tbl2	-0.654105	3.87188	-2.35801	0.0315275	0.274179	-3.48467
Aplp2	0.475686	6.35167	2.35739	0.0315658	0.274179	-3.79357
Themis2	1.27577	4.03281	2.35736	0.0315682	0.274179	-3.44597
Tmem106b	0.563524	5.18032	2.35721	0.0315771	0.274179	-3.57148
Perp	1.53585	3.80123	2.3552	0.0317029	0.274631	-3.43999
Psmb8	-0.181856	9.24801	-2.35496	0.0317182	0.274631	-4.64016
Htatsf1	-0.363905	5.98341	-2.35391	0.0317839	0.274631	-3.81684
Rcn2	-0.561827	4.87711	-2.35385	0.0317878	0.274631	-3.6086
Gzmm	-1.19361	4.48813	-2.3536	0.0318034	0.274631	-3.57609
Ppa1	-0.918683	3.56694	-2.35297	0.0318428	0.274644	-3.47423
Psmf1	0.687548	5.07529	2.35247	0.0318746	0.274644	-3.55688
Ndufc1	-0.433942	6.17323	-2.35027	0.0320135	0.275539	-3.88527
Traf6	-0.450638	5.66792	-2.34777	0.0321715	0.276597	-3.75417
Jade1	-0.482867	5.38093	-2.34307	0.0324718	0.278553	-3.71134
Ddx17	0.338073	7.16028	2.34299	0.0324769	0.278553	-4.05991
Ybx3	0.458329	7.51721	2.34255	0.032505	0.278553	-4.1496
Nfrkb	0.489628	5.74694	2.34147	0.0325744	0.278553	-3.69807
Rnf185	-0.704648	3.90973	-2.34145	0.0325755	0.278553	-3.51562
Setd1b	-0.433935	5.96044	-2.34054	0.0326339	0.278749	-3.84573
Snx32	1.21693	2.98397	2.33605	0.032924	0.280809	-3.46807
Dcun1d3	-0.661529	3.98953	-2.33571	0.0329463	0.280809	-3.52973
Usp38	0.494604	5.84126	2.33482	0.033004	0.280998	-3.70911
Bap1	-0.504419	5.48043	-2.33358	0.0330852	0.281385	-3.73464
Mapk7	1.19933	3.67868	2.3317	0.0332077	0.282122	-3.47494
B3galt4	0.931458	3.90395	2.32988	0.0333268	0.282668	-3.48484
Cacybp	-0.432967	6.47302	-2.32963	0.0333436	0.282668	-3.99797
Mlh1	-0.664954	3.99522	-2.32881	0.0333974	0.282819	-3.54066
Rab1b	0.307297	7.58894	2.32618	0.0335707	0.283687	-4.21808
Nup43	-0.854206	3.63133	-2.32616	0.0335718	0.283687	-3.52614
Pdcd7	-0.450838	5.42847	-2.32536	0.0336249	0.283832	-3.74137
Anxa4	1.07317	4.51449	2.32188	0.0338563	0.28535	-3.52945
Gdi1	-0.274787	7.06329	-2.32156	0.0338772	0.28535	-4.1521
Abhd16a	-0.447099	5.70367	-2.32029	0.0339622	0.285761	-3.81787
Mrps5	-0.671763	5.04195	-2.31781	0.0341286	0.286855	-3.69492
Osgepl1	-0.786895	3.09406	-2.31674	0.0342	0.287149	-3.50447
Nae1	0.530817	5.57648	2.31615	0.0342403	0.287181	-3.70743
Znfx1	-0.434915	5.41112	-2.31494	0.0343214	0.287556	-3.76179
Naca	0.142938	9.58933	2.31427	0.0343671	0.287633	-4.76585
Tnfaip3	-0.319449	8.11	-2.31197	0.0345223	0.288523	-4.4685
Tnip1	0.438244	6.08802	2.31162	0.0345466	0.288523	-3.82687
Prkra	1.08427	3.09916	2.30971	0.034676	0.289161	-3.50301
Nme7	-0.819073	3.6329	-2.30935	0.0347007	0.289161	-3.54556
Vezf1	-0.298446	6.77792	-2.30888	0.034733	0.289161	-4.10376
Ctsa	0.279769	8.53388	2.30793	0.0347974	0.289391	-4.5137
Hadh	0.572417	5.10723	2.30621	0.0349152	0.290065	-3.64543
Tmed5	0.274521	7.42173	2.30402	0.0350659	0.29101	-4.20653
Anks3	-0.478037	4.88789	-2.30235	0.0351814	0.291363	-3.68177
Glrx	0.566808	6.49356	2.30233	0.0351823	0.291363	-3.93113
Eef1a1	0.129852	12.4716	2.30149	0.0352405	0.291377	-5.29144
Ctse	0.685924	5.13155	2.30071	0.0352948	0.291377	-3.65342
Cenpx	-0.309004	7.00411	-2.3007	0.035295	0.291377	-4.1791
Borcs7	0.255513	7.17727	2.29869	0.0354347	0.292123	-4.1548
Nup205	-0.650254	3.79905	-2.29834	0.0354594	0.292123	-3.56975
Gtpbp2	0.398908	6.36524	2.29728	0.0355331	0.292425	-3.92266
Golt1b	-0.527993	5.15393	-2.29577	0.0356385	0.292987	-3.74737
Dad1	-0.198383	8.67747	-2.29458	0.0357219	0.293366	-4.62134
Ppm1j	0.355501	6.84664	2.29349	0.0357981	0.293686	-4.07805
S100a6	0.191147	11.1826	2.29227	0.0358841	0.294085	-5.09824
S1pr5	0.14838	9.84047	2.29093	0.0359782	0.29455	-4.86142
Pdlim2	0.428383	6.52474	2.28928	0.0360949	0.295199	-3.97782
Itpkc	-0.711445	3.56435	-2.28728	0.0362366	0.296051	-3.57442
Disc1	-0.93252	3.86775	-2.28626	0.0363092	0.296338	-3.60434
Suox	0.488167	5.35416	2.28371	0.0364907	0.297185	-3.71895
Csf1	1.96497	3.75037	2.28293	0.0365463	0.297185	-3.54278
Glmn	-0.730097	4.13223	-2.28256	0.0365731	0.297185	-3.62636
4930453N24Rik	-0.322286	7.06316	-2.28223	0.0365969	0.297185	-4.22832
Scarb2	0.58242	5.04329	2.28216	0.0366016	0.297185	-3.66462
Casp3	0.675086	5.06393	2.27908	0.0368231	0.298339	-3.67221
Zfp398	-0.519749	5.20578	-2.27898	0.0368304	0.298339	-3.78432
Hvcn1	-0.540012	5.73956	-2.27824	0.0368836	0.298339	-3.90686
Zfp287	-0.532944	4.66371	-2.27808	0.0368951	0.298339	-3.69095
Nelfcd	0.641202	4.64952	2.27019	0.0374692	0.302576	-3.63779
Zfp780b	-0.764448	3.74786	-2.26983	0.0374957	0.302576	-3.61633
Rap2c	-0.440007	5.3944	-2.26905	0.0375525	0.302724	-3.82903
Pfkp	0.248342	7.76465	2.26603	0.0377747	0.304204	-4.37606
Gpr18	-0.554402	5.86661	-2.2642	0.03791	0.304678	-3.96138
Add3	-0.287697	8.02855	-2.2637	0.0379471	0.304678	-4.51809
Bsdc1	-0.377375	5.76737	-2.26277	0.0380166	0.304678	-3.92634
Cltb	-0.539382	5.31978	-2.26273	0.038019	0.304678	-3.83182
Mff	0.363103	6.44593	2.26263	0.0380268	0.304678	-3.99665
Suv39h1	-0.632461	4.15506	-2.26149	0.0381115	0.304867	-3.66234
Cpsf3	-0.38829	6.10493	-2.26098	0.0381496	0.304867	-4.01391
Nfu1	-0.460163	5.82307	-2.26044	0.0381893	0.304867	-3.9561
Smim10l1	-0.543484	5.19295	-2.25992	0.0382282	0.304867	-3.81854
Coq5	-0.482199	5.03279	-2.25933	0.0382724	0.304867	-3.78014
Pde4b	-0.346988	6.54282	-2.2592	0.0382824	0.304867	-4.13617
Cacna2d4	-0.809402	2.81443	-2.25784	0.0383843	0.30537	-3.58079
5730455P16Rik	1.12679	3.07746	2.25671	0.0384684	0.305595	-3.57665
Traf3ip2	0.577274	5.14715	2.25604	0.0385194	0.305595	-3.72868
Ppme1	-0.451073	5.21027	-2.25591	0.0385288	0.305595	-3.81684
Srpr	-0.254231	7.34826	-2.25378	0.038689	0.305725	-4.35196
Fam53b	0.443475	6.1458	2.25353	0.0387081	0.305725	-3.92564
Gtpbp1	0.523566	5.33869	2.25338	0.0387197	0.305725	-3.76138
Mmadhc	1.05332	4.17546	2.25317	0.0387353	0.305725	-3.61812
Maz	-0.33152	6.77259	-2.25312	0.0387391	0.305725	-4.20962
Mettl26	0.640246	4.83673	2.2524	0.0387932	0.305846	-3.69158
Akt1	0.48152	6.65252	2.25167	0.0388486	0.305977	-4.07563
Gm45837	-0.561262	5.62182	-2.24819	0.039113	0.307581	-3.92889
Ado	-0.567061	4.19976	-2.2479	0.0391357	0.307581	-3.68706
Orai2	-0.31955	6.54299	-2.24696	0.0392069	0.307581	-4.14696
Ubc	-0.131185	10.0279	-2.24694	0.0392084	0.307581	-5.00051
Cstb	0.359091	6.09728	2.24613	0.0392709	0.307586	-3.94882
Txndc11	-0.473267	5.66093	-2.24592	0.039287	0.307586	-3.93471
Pdik1l	0.953167	3.40344	2.24493	0.0393622	0.307869	-3.59668
Sec24c	-0.30353	6.40182	-2.24291	0.0395178	0.308779	-4.11141
Ap3b1	0.287183	6.8029	2.24028	0.039721	0.309332	-4.15898
Jmy	-0.4622	4.9313	-2.24004	0.0397392	0.309332	-3.79795
Sidt1	-0.609159	6.08826	-2.23981	0.0397568	0.309332	-4.06008
Capza1	0.23653	8.07642	2.23977	0.0397599	0.309332	-4.51688
Tgfbr2	-0.250937	7.52391	-2.23904	0.0398165	0.309332	-4.42803
Faf2	-0.461044	5.74201	-2.23895	0.0398239	0.309332	-3.95439
Glyr1	-0.340288	6.23909	-2.23754	0.0399333	0.309876	-4.07652
Hells	0.816125	3.91084	2.23679	0.0399916	0.310023	-3.62936
Ogdh	0.269467	7.34367	2.23585	0.0400648	0.310051	-4.31543
Tmx2	-0.659733	4.55512	-2.23573	0.0400738	0.310051	-3.76352
Cep192	0.421424	6.03754	2.23406	0.0402041	0.310754	-3.9464
Gpn1	-0.546863	4.4326	-2.23016	0.0405103	0.312784	-3.74012
Zdhhc13	-0.731415	3.92648	-2.22967	0.040549	0.312784	-3.69444
Dicer1	-0.46375	5.4996	-2.22918	0.0405879	0.312784	-3.92686
Itga1	0.459287	6.28558	2.22829	0.0406578	0.312784	-3.99742
Med4	-0.465902	5.59709	-2.22817	0.0406672	0.312784	-3.94989
Cdk9	-0.297373	6.56487	-2.22728	0.0407382	0.312784	-4.18243
Runx1	-0.312	6.99291	-2.22645	0.0408038	0.312784	-4.30519
Fam120b	-0.379285	6.3709	-2.22616	0.0408269	0.312784	-4.14312
Uqcc2	-0.452945	6.39458	-2.22605	0.0408354	0.312784	-4.17461
Med24	-0.560291	4.35833	-2.2257	0.0408634	0.312784	-3.74217
Hmgn5	-0.556996	4.89863	-2.22494	0.0409234	0.312939	-3.81666
Rsl1	0.898431	2.79711	2.22258	0.0411113	0.314011	-3.62313
Ttll1	-0.834764	3.46095	-2.22218	0.0411432	0.314011	-3.66446
Srgap3	0.754503	5.09412	2.22164	0.0411868	0.31404	-3.76463
Llgl2	-0.518286	4.63095	-2.22077	0.0412561	0.314109	-3.78083
Dusp22	0.993332	3.69992	2.22038	0.041288	0.314109	-3.63978
Zscan25	0.987059	3.61975	2.2198	0.041334	0.314109	-3.63821
Ptms	0.483403	7.3069	2.21954	0.0413553	0.314109	-4.30354
Gpr137	0.961002	3.3034	2.21902	0.041397	0.314123	-3.63158
Ubac1	-0.465561	5.25034	-2.21455	0.0417579	0.316357	-3.88724
Zfyve19	0.886577	4.28558	2.21395	0.0418065	0.316357	-3.68526
Oxnad1	-0.638792	3.77144	-2.21358	0.0418366	0.316357	-3.7009
Tmem50a	0.217653	8.90593	2.21339	0.0418519	0.316357	-4.78562
Tmem71	0.262686	7.69167	2.21151	0.0420044	0.317206	-4.45666
Abi2	-0.782939	3.74073	-2.21059	0.0420795	0.317342	-3.7124
Idh3g	-0.365413	5.88666	-2.2103	0.0421029	0.317342	-4.04166
Ermp1	0.644922	4.80575	2.20942	0.042175	0.317581	-3.7545
Tvp23b	-0.473754	5.18384	-2.20678	0.0423916	0.318908	-3.90235
Lig3	-0.770703	3.85832	-2.20487	0.0425488	0.319786	-3.7324
Pabpc1	0.149454	10.409	2.20383	0.0426348	0.320127	-5.12994
Rpl30	0.179724	11.3452	2.20267	0.0427306	0.32054	-5.28683
Fdft1	-0.624257	4.25102	-2.20049	0.042911	0.321588	-3.77187
Cox7a2	-0.226713	7.96129	-2.19945	0.0429972	0.321664	-4.61197
Pex16	-0.525045	5.50486	-2.19922	0.0430169	0.321664	-3.97784
Itgal	0.19863	9.41213	2.19866	0.0430636	0.321664	-4.93036
Lrif1	-0.426538	5.7497	-2.19841	0.0430843	0.321664	-4.0347
Mtfr1l	-0.358366	6.31768	-2.19768	0.0431454	0.321815	-4.18951
Pim1	-0.349581	7.92349	-2.19691	0.0432097	0.32199	-4.6258
Nckap1	-0.569018	4.53896	-2.19615	0.0432735	0.322161	-3.81428
Mettl21a	0.7944	3.99602	2.19518	0.043354	0.322164	-3.69992
Prune1	0.52726	5.4973	2.19516	0.0433557	0.322164	-3.89489
R3hdm4	0.286791	6.94918	2.19391	0.0434613	0.322423	-4.28026
Trappc5	-0.415492	5.95441	-2.19378	0.0434723	0.322423	-4.09955
Etf1	0.36175	6.0924	2.1912	0.0436893	0.323405	-4.03895
Ifi27	-0.257129	7.37025	-2.19062	0.0437383	0.323405	-4.4694
Lonp2	-0.231256	7.10526	-2.19047	0.0437512	0.323405	-4.39053
Rnf146	-0.412509	5.95798	-2.18983	0.0438054	0.323405	-4.10027
Fbxo28	-0.358266	5.99364	-2.18934	0.0438469	0.323405	-4.09984
Hsp90aa1	-0.298231	8.11262	-2.18898	0.0438771	0.323405	-4.67918
Rprd2	-0.428131	5.63075	-2.18881	0.0438918	0.323405	-4.02046
Tmed7	0.364239	6.36836	2.18739	0.0440121	0.323924	-4.11878
Abraxas1	-0.650793	3.96309	-2.18701	0.0440445	0.323924	-3.76306
Tsga10	1.1129	3.68879	2.18601	0.0441296	0.324199	-3.68852
Polr3gl	-0.385023	5.61251	-2.18551	0.0441723	0.324199	-4.00902
Polr2g	-0.26394	6.63109	-2.18477	0.0442357	0.324199	-4.27848
Snai3	-0.806418	3.9287	-2.18465	0.0442463	0.324199	-3.76948
Hdac2	-0.435753	5.8656	-2.18372	0.0443255	0.324477	-4.09484
Zfp319	-0.493281	4.28598	-2.1822	0.0444561	0.325131	-3.79501
Acp5	0.259911	8.70749	2.18002	0.0446434	0.326199	-4.78056
Per1	-0.484211	5.3611	-2.17664	0.0449356	0.32803	-3.99017
Snapc5	0.437154	6.30538	2.1753	0.0450519	0.328574	-4.10205
Dusp23	1.16809	2.27359	2.17338	0.0452195	0.329492	-3.68893
Pmaip1	-0.441779	6.17402	-2.17224	0.045319	0.329912	-4.19036
Zfp281	-0.562619	4.81263	-2.17079	0.0454453	0.330279	-3.89766
Zrsr2	-0.33964	6.12258	-2.17038	0.0454814	0.330279	-4.16752
Siah1a	-0.485945	5.0825	-2.16981	0.0455315	0.330279	-3.93199
Zfp217	-0.526743	4.64388	-2.16975	0.0455369	0.330279	-3.86281
Zwint	-0.448925	5.87904	-2.16878	0.0456218	0.330288	-4.11163
Rangap1	-0.432457	5.90389	-2.16878	0.045622	0.330288	-4.12939
Ap3m2	0.829856	4.11341	2.16826	0.0456679	0.330317	-3.7445
Top1	-0.239821	7.47846	-2.16572	0.0458915	0.331537	-4.54454
Rpl31	-0.367597	7.60328	-2.16539	0.0459207	0.331537	-4.58614
Cyfip1	0.705759	4.47228	2.16491	0.0459637	0.331544	-3.78727
Eomes	-0.96951	3.94902	-2.16327	0.0461088	0.33192	-3.80769
Fam78a	-0.38595	6.58065	-2.1627	0.0461596	0.33192	-4.31029
Atg7	0.835931	4.79431	2.16262	0.0461669	0.33192	-3.82081
Rps4x	0.128001	11.4963	2.16242	0.0461842	0.33192	-5.38358
Cenpl	0.834828	3.48616	2.15904	0.0464856	0.333782	-3.72228
B3gnt5	1.12901	4.72359	2.1576	0.0466144	0.333986	-3.80937
Dnajb1	-0.261074	7.56056	-2.15748	0.0466251	0.333986	-4.58081
Ddrgk1	-0.311069	6.7654	-2.15731	0.0466411	0.333986	-4.37355
Eif2ak1	0.424601	5.8999	2.15649	0.0467148	0.334069	-4.0468
Slc29a3	0.826982	4.04739	2.15623	0.0467375	0.334069	-3.75969
Cmas	0.34988	6.81429	2.15484	0.0468627	0.334293	-4.29718
Arrdc1	0.386524	7.15048	2.15475	0.0468713	0.334293	-4.39524
Clk1	-0.32106	7.2879	-2.15447	0.046896	0.334293	-4.51896
Fbxl12	-0.382995	6.15981	-2.15314	0.0470159	0.334698	-4.21663
Mfsd1	0.548899	5.61708	2.1529	0.0470378	0.334698	-3.97135
Ngdn	-0.243955	6.92051	-2.15165	0.047151	0.335202	-4.41346
Msn	0.122225	9.82678	2.15097	0.0472132	0.335342	-5.1095
Dmap1	-0.590704	4.90618	-2.14951	0.0473455	0.335366	-3.95747
Leng9	-0.705628	4.62519	-2.14933	0.0473623	0.335366	-3.91478
Npm1	0.156754	9.15537	2.14906	0.0473866	0.335366	-4.96173
Ube2t	0.950912	3.08924	2.14905	0.0473879	0.335366	-3.72463
Lcmt1	0.562584	5.22251	2.14859	0.0474294	0.335366	-3.92265
Eny2	-0.349294	6.22901	-2.14748	0.0475307	0.335781	-4.23522
Arpp19	-0.343338	7.33013	-2.14472	0.047783	0.337262	-4.55386
Dffa	0.928544	3.8056	2.1433	0.0479135	0.337306	-3.75303
Sidt2	0.490713	5.8376	2.14288	0.0479528	0.337306	-4.05121
Uqcrfs1	0.266629	7.39229	2.14267	0.0479714	0.337306	-4.49147
Lpp	0.823862	4.73328	2.14226	0.0480092	0.337306	-3.83071
Paxbp1	-0.410256	6.0685	-2.14186	0.0480468	0.337306	-4.21325
Znrf1	-0.38888	5.74497	-2.14142	0.0480869	0.337306	-4.12243
Brms1l	-0.541648	4.54469	-2.1414	0.0480888	0.337306	-3.90298
Il27ra	0.241247	6.98543	2.14023	0.0481966	0.337556	-4.38706
Rad1	-0.457926	5.04179	-2.13989	0.048228	0.337556	-3.97886
Ifi47	-0.296525	7.81937	-2.13906	0.048305	0.337556	-4.68188
Cd274	-0.520735	5.08289	-2.13888	0.0483218	0.337556	-3.99336
Xpnpep1	0.562659	5.26067	2.13855	0.0483525	0.337556	-3.93468
Arpc1a	0.297318	6.62955	2.13824	0.0483813	0.337556	-4.27637
Enc1	-0.899918	3.96893	-2.13597	0.0485925	0.338303	-3.84492
Ftl1	-0.113284	9.69585	-2.13559	0.0486278	0.338303	-5.12775
Eapp	-0.321116	6.75083	-2.13551	0.048635	0.338303	-4.40597
Sbno1	-0.244118	7.00847	-2.13525	0.04866	0.338303	-4.46411
Fam117a	0.357531	7.19471	2.1342	0.0487581	0.338686	-4.44417
Klhl24	0.799687	5.17206	2.13295	0.0488749	0.339152	-3.91156
Tpcn1	-0.845619	4.44784	-2.13211	0.0489534	0.339152	-3.92086
Metrnl	-0.644401	5.14112	-2.1321	0.0489542	0.339152	-4.01739
Rnaseh2c	-0.246801	7.3452	-2.13104	0.0490538	0.339544	-4.55964
Patz1	-0.575881	4.78583	-2.13021	0.0491315	0.339644	-3.96178
Ubqln2	-0.399545	5.93373	-2.12947	0.0492016	0.339644	-4.18022
H3f3b	-0.287763	10.7303	-2.12929	0.0492182	0.339644	-5.34295
Cap1	0.170505	8.90256	2.12906	0.0492407	0.339644	-4.93747
Zfp251	-0.555088	4.71456	-2.12803	0.0493377	0.340016	-3.95416
Aebp2	0.275216	6.62864	2.12746	0.0493914	0.340089	-4.2972
Psmd10	-0.398081	5.59674	-2.12635	0.0494965	0.340515	-4.10813
Snrpd2	-0.237899	7.36	-2.12567	0.0495606	0.340659	-4.56708
Erlec1	1.08491	4.47813	2.12484	0.0496397	0.340673	-3.82744
Fam20b	-0.629518	4.26434	-2.12472	0.0496511	0.340673	-3.89499
Wdr75	-0.545365	4.83491	-2.12429	0.0496923	0.340673	-3.97977
Mrfap1	-0.21838	7.43854	-2.12219	0.0498924	0.341677	-4.59578
Ap2a2	-0.447234	4.90856	-2.12104	0.0500019	0.341677	-3.98969
Adipor1	0.227813	7.42968	2.12104	0.0500023	0.341677	-4.54006
Polr3e	-0.725884	4.10396	-2.1206	0.0500441	0.341677	-3.87665
Btbd1	0.379032	6.30672	2.12024	0.0500783	0.341677	-4.2052
Mrpl4	0.264433	7.29754	2.12003	0.0500988	0.341677	-4.50776
Kdm1a	-0.296647	6.56693	-2.11906	0.0501915	0.342014	-4.37244
Rab3gap2	-0.60545	4.51728	-2.11812	0.0502824	0.342256	-3.9439
Adam19	0.370312	6.9997	2.11752	0.0503404	0.342256	-4.42142
Mettl25	-0.561683	4.37456	-2.11672	0.0504168	0.342256	-3.91681
Zhx3	-0.664941	3.57454	-2.11618	0.0504693	0.342256	-3.8284
N4bp2	0.877418	2.02704	2.11617	0.0504697	0.342256	-3.7636
Ccnh	-0.430894	5.24909	-2.11558	0.0505275	0.342256	-4.05057
Sec11c	0.226187	7.36194	2.11554	0.0505309	0.342256	-4.5374
Dpm3	-0.294268	7.49956	-2.11321	0.0507561	0.343211	-4.64855
Nck1	-0.333258	6.4007	-2.11316	0.0507612	0.343211	-4.34273
Mvp	-0.768712	3.71296	-2.11274	0.0508025	0.343211	-3.85126
Rasa2	-0.627899	5.22337	-2.1116	0.0509133	0.343664	-4.08131
Ctnna1	1.00515	3.57755	2.10917	0.0511499	0.344667	-3.7953
Cdc42ep3	-0.252486	7.29247	-2.10902	0.0511645	0.344667	-4.58589
Rpl13	0.108614	11.798	2.10873	0.0511929	0.344667	-5.52851
Mycbp2	-0.219831	7.4709	-2.10809	0.0512557	0.344795	-4.62989
Epb41	-0.335864	6.85762	-2.10608	0.0514525	0.345824	-4.47853
St8sia4	-0.501118	5.70279	-2.10524	0.0515347	0.346081	-4.18409
Sec63	-0.298016	6.36669	-2.10303	0.051753	0.346968	-4.34714
Adnp2	-0.554243	4.38785	-2.10301	0.0517547	0.346968	-3.93723
Mrpl11	-0.549919	5.03037	-2.10226	0.0518288	0.347169	-4.05129
Vwa8	-0.629862	3.76538	-2.10172	0.0518818	0.347229	-3.87063
Tpra1	-0.463116	5.42256	-2.10097	0.051956	0.347395	-4.11229
Tmem151a	0.853213	4.44533	2.10058	0.0519946	0.347395	-3.87754
Kansl3	-0.365823	5.50674	-2.1001	0.0520424	0.347419	-4.12575
Gtf2h5	0.381434	6.23943	2.09834	0.0522175	0.348267	-4.22129
Map2k3	0.363095	5.95957	2.09663	0.0523884	0.348267	-4.15845
Egln2	-0.325771	5.92989	-2.09623	0.0524283	0.348267	-4.2448
Retreg1	-0.857936	3.61211	-2.09569	0.0524819	0.348267	-3.86757
Ssr4	0.307086	7.16989	2.09518	0.0525336	0.348267	-4.5112
Glod4	-0.309273	6.05476	-2.09497	0.0525539	0.348267	-4.27018
Chpf	-0.400672	5.48519	-2.0949	0.0525613	0.348267	-4.13463
Rinl	0.343923	7.01878	2.09489	0.052562	0.348267	-4.4523
Capn2	0.214088	7.73886	2.09484	0.0525669	0.348267	-4.6777
Cenpo	-0.68929	3.89415	-2.09362	0.0526896	0.348751	-3.90019
Klrk1	-0.160782	9.49305	-2.09323	0.0527285	0.348751	-5.1601
Akap11	-0.568189	5.03103	-2.09276	0.0527764	0.348776	-4.06659
Pdpr	0.923551	3.98624	2.09085	0.052968	0.349748	-3.84732
Sike1	0.279751	7.50675	2.08884	0.0531714	0.350798	-4.6156
Calr	-0.26143	7.18645	-2.08822	0.0532345	0.35092	-4.58768
Ube2j1	0.340206	5.97291	2.08665	0.0533934	0.351674	-4.18332
4930503L19Rik	1.0459	4.18368	2.08556	0.0535042	0.352109	-3.86678
6030458C11Rik	-0.484691	4.71934	-2.08275	0.0537909	0.353258	-4.01206
Tbrg4	-0.45414	5.05128	-2.0822	0.053847	0.353258	-4.08126
Zfp180	-0.576782	4.64452	-2.08203	0.0538648	0.353258	-4.01587
Trim41	-0.545301	4.32969	-2.08152	0.0539166	0.353258	-3.96029
Sgsh	-0.548278	4.66487	-2.08078	0.0539925	0.353258	-4.01515
Chd6	-0.51947	5.21725	-2.0807	0.0540013	0.353258	-4.10944
Morf4l2	-0.415628	5.80159	-2.08005	0.0540675	0.353258	-4.23337
Zkscan7	-0.886246	2.69185	-2.07983	0.0540909	0.353258	-3.82845
Dph5	-0.50616	4.76607	-2.07839	0.0542386	0.353258	-4.0345
Asf1a	-0.508027	5.14769	-2.07755	0.0543255	0.353258	-4.10797
Dclre1b	-0.621247	4.02269	-2.07728	0.0543536	0.353258	-3.93648
Smarca5	-0.290828	7.64469	-2.07716	0.0543658	0.353258	-4.73784
Zbtb32	1.04845	4.65199	2.07715	0.054367	0.353258	-3.92097
Ulk3	0.599516	4.94458	2.07714	0.0543675	0.353258	-3.98381
Gps2	-0.209769	7.48371	-2.07695	0.0543871	0.353258	-4.68883
Clcn7	-0.648566	4.31887	-2.07634	0.0544504	0.353258	-3.97859
B3gnt9	0.924404	2.65911	2.07613	0.054472	0.353258	-3.81672
Twf2	0.226515	7.86383	2.076	0.0544852	0.353258	-4.74623
Cdc16	-0.465426	4.7913	-2.07323	0.0547728	0.35483	-4.03798
Pkm	0.16998	8.43174	2.07199	0.0549025	0.355318	-4.90772
Hp1bp3	-0.195717	8.02894	-2.07164	0.0549382	0.355318	-4.8437
Cep19	-0.935801	3.38246	-2.07106	0.0549995	0.355423	-3.8951
Csrp1	0.480858	5.34298	2.07016	0.0550928	0.355734	-4.0627
Xiap	0.515657	5.85832	2.0697	0.0551408	0.355753	-4.16191
Smpd1	0.282301	6.57468	2.06912	0.0552022	0.355858	-4.38611
Pcgf2	-0.497399	4.29878	-2.06867	0.0552491	0.355869	-3.97373
Tsr1	-0.653845	4.07709	-2.06725	0.0553976	0.356395	-3.95869
Zfp36l2	-0.181978	9.68122	-2.06703	0.0554211	0.356395	-5.25223
Herc3	-0.458182	4.85543	-2.06465	0.0556718	0.357715	-4.06739
Ep300	0.309127	6.90029	2.06249	0.0559003	0.358891	-4.48459
Ccdc47	-0.301646	5.96512	-2.05988	0.0561775	0.359858	-4.30473
Aamp	-0.193592	7.21469	-2.05975	0.056191	0.359858	-4.64185
Atp6v1b2	-0.350748	5.96697	-2.05895	0.0562764	0.359858	-4.30148
Prkar2a	-0.527443	4.89947	-2.058	0.0563781	0.359858	-4.09142
Zcchc9	-0.471292	5.22686	-2.05782	0.0563969	0.359858	-4.14408
F2rl1	-1.3813	2.57982	-2.0577	0.0564095	0.359858	-3.86148
Otud7b	-0.475673	4.50388	-2.05757	0.0564234	0.359858	-4.02287
Tbl3	-0.559098	4.67454	-2.05686	0.0565002	0.359858	-4.05732
Tex264	0.407591	6.01418	2.05624	0.0565665	0.359858	-4.23481
Babam2	0.459903	5.64078	2.05595	0.0565974	0.359858	-4.15279
Zfp518a	-0.543494	4.7863	-2.05573	0.0566205	0.359858	-4.07016
Zfp444	-0.467204	4.8766	-2.05488	0.0567122	0.359858	-4.08935
Dnaja2	-0.197498	7.52068	-2.05415	0.0567905	0.359858	-4.73465
Coro1b	0.288378	8.03011	2.05398	0.056809	0.359858	-4.8152
Akna	-0.245643	8.56968	-2.0539	0.0568177	0.359858	-5.02174
Fbxo8	0.50153	4.87623	2.05385	0.0568226	0.359858	-4.01679
Ccdc107	-0.56317	5.31772	-2.05356	0.056854	0.359858	-4.18226
Hdhd5	0.310787	6.8072	2.05273	0.0569428	0.359858	-4.46485
Zscan26	-0.458873	5.00119	-2.05263	0.0569538	0.359858	-4.10629
Parp6	-0.520127	4.94438	-2.05254	0.0569638	0.359858	-4.10671
Rsu1	0.436691	6.31623	2.05198	0.0570236	0.359865	-4.31738
Ndfip1	0.188191	8.75956	2.05141	0.0570857	0.359865	-5.03687
Trir	0.201148	7.76373	2.05115	0.0571134	0.359865	-4.7622
Tmco6	0.757113	4.58456	2.05043	0.0571911	0.359865	-3.96904
Nudt13	-0.710008	3.71211	-2.05042	0.0571931	0.359865	-3.94301
Cd8a	0.132165	9.42894	2.04857	0.0573932	0.360836	-5.20042
Tmpo	-0.326865	6.73065	-2.04768	0.05749	0.360999	-4.53838
Rdh11	-0.718192	3.79174	-2.04749	0.0575107	0.360999	-3.96085
Metrn	-0.473395	4.75294	-2.04631	0.0576384	0.361262	-4.07871
Azi2	-0.221135	7.34295	-2.04626	0.0576444	0.361262	-4.69832
Msh6	-0.58824	4.25241	-2.04316	0.0579828	0.363095	-4.00727
Camk4	0.396373	6.28319	2.0423	0.0580767	0.363394	-4.34228
Abhd18	-0.671023	4.01052	-2.04065	0.0582583	0.364128	-3.99233
Rmdn1	-0.461511	4.494	-2.0404	0.0582864	0.364128	-4.04455
Vat1	-0.522386	5.26042	-2.03763	0.0585912	0.365483	-4.17656
Glcci1	0.533073	5.40884	2.03759	0.0585959	0.365483	-4.12694
Myo9a	-0.700438	3.90802	-2.03576	0.058799	0.36646	-3.99134
Dbr1	0.580481	4.95032	2.03338	0.0590628	0.367665	-4.04767
Tigar	-0.808502	3.98518	-2.03273	0.0591363	0.367665	-4.01351
Zdhhc20	0.295023	7.7492	2.03253	0.0591584	0.367665	-4.76869
Stk19	0.610245	4.75224	2.03209	0.0592076	0.367665	-4.03004
Ing5	-0.433155	5.03881	-2.03133	0.0592918	0.367665	-4.14887
Lbh	-0.316996	6.72525	-2.0312	0.0593063	0.367665	-4.57018
Dyrk2	-0.351146	5.67094	-2.03074	0.0593586	0.367665	-4.28274
Rlf	0.410949	6.01215	2.03027	0.0594106	0.367665	-4.27383
Bzw2	-0.558723	5.17756	-2.02975	0.0594688	0.367665	-4.18983
Prpf19	-0.286313	6.30383	-2.02948	0.0594995	0.367665	-4.44267
Ndufa4	-0.193403	8.13321	-2.0292	0.0595306	0.367665	-4.94537
Ulk2	0.449972	5.2959	2.02901	0.059552	0.367665	-4.12029
Gpsm1	1.08946	3.29447	2.02497	0.0600075	0.370187	-3.89878
Plscr1	1.07731	4.20208	2.02216	0.0603258	0.371609	-3.9576
Trmt112	-0.20858	8.16178	-2.0221	0.0603322	0.371609	-4.96
Faf1	-0.285393	6.19787	-2.02123	0.0604313	0.371795	-4.42764
Stat4	-0.206526	8.01461	-2.02093	0.0604646	0.371795	-4.92803
Tmem250-ps	-0.588854	3.68754	-2.02059	0.0605039	0.371795	-3.97786
Amfr	-0.230788	7.08799	-2.01987	0.0605863	0.372011	-4.67597
Socs7	-0.603694	3.85985	-2.01846	0.0607469	0.372513	-3.99831
Tbcd	0.683073	5.00243	2.01832	0.0607625	0.372513	-4.07816
Commd4	0.436619	6.42412	2.01646	0.0609756	0.373471	-4.40422
Klc1	0.496082	4.85251	2.01585	0.0610463	0.373471	-4.06846
Cipc	-0.386891	5.80816	-2.01572	0.0610609	0.373471	-4.33788
Klk8	0.427072	7.72939	2.01517	0.0611235	0.373564	-4.76586
Cox10	-0.614377	4.22761	-2.01287	0.0613887	0.374894	-4.05386
Ost4	-0.196399	8.60101	-2.01116	0.0615861	0.375809	-5.09891
Kif16b	-0.603199	4.39302	-2.00835	0.0619122	0.377506	-4.08363
Sub1	0.200106	8.98602	2.00728	0.0620368	0.377803	-5.16524
Psd4	-0.324502	6.90439	-2.00711	0.0620566	0.377803	-4.66418
Pold1	-0.442597	4.94494	-2.006	0.0621859	0.378297	-4.17852
Cnnm2	0.889454	3.03423	2.0053	0.0622681	0.378505	-3.91656
Ap4m1	0.980459	2.83081	2.0048	0.0623258	0.378564	-3.91087
Hid1	0.236394	7.27625	2.00369	0.0624558	0.379062	-4.69733
Mid1ip1	0.512256	5.47766	2.00288	0.0625513	0.379349	-4.19156
Cyba	0.210506	10.0475	2.00206	0.0626472	0.379639	-5.40803
Tcp11l2	0.343182	6.47199	2.00129	0.062738	0.379897	-4.46817
Brpf1	-0.404274	5.66292	-1.99974	0.062921	0.380713	-4.31912
Herpud1	-0.384539	5.81515	-1.99902	0.0630059	0.380927	-4.37318
Nckap5l	-0.658668	3.16762	-1.99733	0.0632054	0.380927	-3.96638
Slc22a5	0.819858	3.15484	1.99729	0.0632105	0.380927	-3.93195
Hars2	0.662984	3.9827	1.99721	0.0632193	0.380927	-3.98837
Slc25a51	0.437286	5.97083	1.99721	0.0632204	0.380927	-4.30099
Dtx3	0.490284	5.55499	1.99699	0.0632462	0.380927	-4.21341
Rad18	-0.762281	4.35943	-1.99492	0.063492	0.382115	-4.11349
Edc3	0.685906	4.1341	1.99416	0.0635817	0.382363	-4.0066
Tecpr1	-0.27539	6.60463	-1.99339	0.0636735	0.38253	-4.58597
Pnpla8	-0.471495	5.15252	-1.99312	0.0637065	0.38253	-4.23396
Parp4	-0.292013	6.47914	-1.99185	0.0638583	0.38315	-4.55204
Ypel3	0.144131	9.28545	1.98943	0.0641475	0.384593	-5.26821
Eif4g2	-0.188458	9.01294	-1.98669	0.0644772	0.386119	-5.23861
Polr2j	-0.267246	6.83568	-1.9865	0.0645	0.386119	-4.65671
Cfl1	0.102463	10.8112	1.98595	0.0645668	0.386225	-5.57972
Smim8	1.07084	4.32687	1.98468	0.0647207	0.386532	-4.02368
Tmem209	0.529536	4.6671	1.98439	0.0647557	0.386532	-4.09215
Rpl12	-0.195121	9.70869	-1.98431	0.0647651	0.386532	-5.39423
Cdca7l	0.618784	4.62625	1.98362	0.0648486	0.386592	-4.08266
Zmat1	-0.647062	3.65538	-1.98342	0.0648734	0.386592	-4.03108
Ccdc32	0.644365	5.01499	1.98226	0.0650144	0.38714	-4.13685
Dnajc2	-0.219327	6.83197	-1.98027	0.0652563	0.388076	-4.67153
Cct6a	-0.306323	6.57751	-1.98016	0.0652699	0.388076	-4.59444
Rnf169	-0.326555	5.78503	-1.97948	0.0653523	0.388272	-4.38768
Crebzf	-0.261163	6.6187	-1.97845	0.0654787	0.388624	-4.62063
Tmem154	-0.660931	4.46801	-1.97819	0.06551	0.388624	-4.15453
9130401M01Rik	-0.497852	5.07485	-1.9771	0.0656439	0.389125	-4.24408
Ctdsp2	-0.679823	4.52671	-1.97176	0.066301	0.391725	-4.16397
Zfp771	-0.592632	4.38886	-1.97089	0.0664092	0.391725	-4.13687
Mfsd14a	-0.312646	6.12731	-1.97058	0.0664474	0.391725	-4.49735
Mrpl9	0.277266	7.0684	1.97041	0.0664683	0.391725	-4.69365
Ift52	0.537211	4.98087	1.97026	0.0664873	0.391725	-4.15468
Helq	-0.636784	3.60374	-1.9701	0.0665068	0.391725	-4.04141
Copg2	0.748733	4.70797	1.96992	0.0665289	0.391725	-4.11077
Tmod3	-0.218434	7.36563	-1.96979	0.0665451	0.391725	-4.83091
Plin3	-0.938206	4.80463	-1.96967	0.0665597	0.391725	-4.24427
Pgm3	-0.617638	4.17713	-1.96919	0.0666204	0.391725	-4.11182
Gm2a	0.36276	6.71681	1.96912	0.066629	0.391725	-4.58147
Fmo5	1.02356	2.35823	1.96757	0.0668218	0.392101	-3.95384
Exoc6b	-0.483703	4.66664	-1.96657	0.0669459	0.392101	-4.18515
Rubcn	-0.616421	3.91679	-1.9664	0.0669668	0.392101	-4.08706
Mettl9	-0.560151	5.02322	-1.96633	0.0669755	0.392101	-4.25931
Cep290	-1.39408	1.24522	-1.96625	0.066986	0.392101	-3.9483
Bex3	0.749003	5.06661	1.966	0.067017	0.392101	-4.16162
Ten1	0.398875	6.18348	1.96581	0.0670411	0.392101	-4.43024
Hnrnpl	0.178773	8.52168	1.96372	0.0673021	0.393335	-5.11439
Ppdpf	0.291806	6.73206	1.96153	0.0675774	0.394652	-4.61138
Map4k4	0.260655	7.00778	1.96111	0.0676301	0.394667	-4.69056
Bysl	-0.497554	4.70803	-1.96005	0.0677646	0.394822	-4.19707
Pde7a	-0.25398	8.06016	-1.95996	0.0677761	0.394822	-5.04325
Uqcc1	-0.503235	4.66299	-1.95937	0.0678501	0.394822	-4.19182
Crtc2	-0.309961	6.28278	-1.9586	0.0679479	0.394822	-4.55485
Rgl2	-0.346847	5.56448	-1.95856	0.0679526	0.394822	-4.36366
Atad2b	0.390586	5.89071	1.95852	0.0679571	0.394822	-4.36954
Slc17a9	-0.486425	4.67414	-1.95779	0.0680504	0.395073	-4.2014
Fxn	0.86477	4.28057	1.95688	0.0681652	0.395448	-4.06754
Pnisr	-0.203509	7.66736	-1.95628	0.0682409	0.395522	-4.94498
Scpep1	1.19013	4.16215	1.95599	0.0682783	0.395522	-4.03461
Cdc20b	0.598242	6.05982	1.95548	0.0683424	0.395603	-4.3709
Epha3	-2.16674	0.425142	-1.95423	0.0685016	0.395986	-3.96233
Gtf3c6	-0.358384	5.75959	-1.95418	0.068509	0.395986	-4.42417
Tnfaip1	-0.543943	4.02382	-1.9521	0.0687742	0.397081	-4.1116
Dnmt1	-0.244915	7.01022	-1.9519	0.0687992	0.397081	-4.77106
Polr1c	-0.478703	4.39795	-1.95081	0.068939	0.397597	-4.16326
Kmt5b	-0.276248	6.32814	-1.94963	0.06909	0.398029	-4.58018
Nme1	-0.492318	4.96799	-1.94944	0.0691148	0.398029	-4.26806
Arl6ip4	0.346207	6.30742	1.94825	0.069268	0.398202	-4.49416
Tbp	-0.376249	5.30659	-1.94772	0.0693353	0.398202	-4.32357
Efr3a	0.327934	6.47639	1.9477	0.0693385	0.398202	-4.54145
Tmed10	-0.252241	6.7522	-1.9476	0.0693515	0.398202	-4.70843
Vamp5	-0.411458	5.0732	-1.94724	0.0693975	0.398202	-4.28936
F2rl2	-0.461356	4.28937	-1.94638	0.0695084	0.398548	-4.15738
Rab5b	-0.324341	5.82579	-1.94542	0.0696331	0.398695	-4.44584
Rbm4	0.592516	4.11307	1.94534	0.0696429	0.398695	-4.07679
Rps6ka4	0.484609	5.81149	1.9445	0.0697518	0.398695	-4.34906
Prim2	0.842768	3.44542	1.94449	0.0697527	0.398695	-4.01563
Ercc5	-0.548405	4.61498	-1.94383	0.069839	0.398695	-4.20624
Tmem229b	0.724261	4.11146	1.94291	0.0699583	0.398695	-4.0777
Mydgf	-0.323677	5.70977	-1.94252	0.0700089	0.398695	-4.41909
Zswim1	-0.595366	4.37032	-1.94238	0.0700264	0.398695	-4.18308
Dnajc11	-0.52965	4.48459	-1.94203	0.0700723	0.398695	-4.20102
Dusp2	-0.206909	9.94688	-1.94198	0.0700788	0.398695	-5.51977
Smim26	-0.450058	5.27707	-1.94189	0.0700901	0.398695	-4.33065
Tigd2	-0.26455	6.31284	-1.941	0.0702067	0.398718	-4.5946
Lsm2	-0.431765	4.7898	-1.94091	0.0702179	0.398718	-4.24353
S1pr4	0.191038	8.46694	1.94044	0.0702797	0.398718	-5.13656
Ubxn8	1.03308	4.08783	1.94031	0.0702966	0.398718	-4.05699
Glud1	0.253088	8.05877	1.93862	0.0705172	0.399682	-5.02295
Atm	-0.333862	5.79939	-1.93802	0.0705956	0.399839	-4.46301
Ech1	0.201971	7.64061	1.93713	0.0707114	0.400146	-4.91321
Rif1	-0.326812	5.66112	-1.93683	0.0707514	0.400146	-4.42408
Pcgf6	-0.514035	4.46353	-1.93627	0.0708246	0.400273	-4.20173
Ccdc88b	0.353649	6.01994	1.93575	0.0708929	0.400372	-4.43271
Ccdc9	-0.462637	5.30867	-1.93513	0.070975	0.400549	-4.36336
Pfn1	0.132409	11.7817	1.93363	0.0711723	0.401074	-5.82306
Naip2	0.716291	4.69765	1.93351	0.071188	0.401074	-4.15708
Capn15	-0.411596	4.73574	-1.93326	0.0712207	0.401074	-4.24083
Mcu	-0.538103	4.15724	-1.93208	0.071377	0.401184	-4.15989
Mxd4	0.284335	7.06312	1.93152	0.0714504	0.401184	-4.74795
Gpn2	-0.516174	4.39537	-1.93141	0.0714652	0.401184	-4.19359
Nudt9	-0.440085	5.44729	-1.9313	0.0714792	0.401184	-4.39355
Trim24	-0.397711	5.75936	-1.93092	0.0715305	0.401184	-4.46677
Tbc1d10c	0.134917	9.23312	1.9308	0.0715454	0.401184	-5.35535
Trmt2b	0.579207	4.50448	1.93014	0.0716335	0.401392	-4.15103
Mafg	-0.765814	3.57379	-1.92956	0.0717111	0.401467	-4.10478
Phf23	-0.345508	5.94502	-1.92927	0.0717487	0.401467	-4.51376
Ppp1r9b	-0.306077	6.5673	-1.92873	0.0718205	0.401583	-4.68165
Ndel1	-0.28359	6.05791	-1.92715	0.0720307	0.402473	-4.54337
Frrs1	0.490518	5.40646	1.92662	0.0721019	0.402558	-4.29316
Smim14	0.381653	6.26115	1.92627	0.0721479	0.402558	-4.52284
Lpxn	-0.334194	6.63491	-1.92574	0.0722189	0.402669	-4.71609
Usp4	-0.277401	6.40392	-1.92489	0.0723332	0.402909	-4.64415
Csrnp1	-0.377709	5.7204	-1.92455	0.0723786	0.402909	-4.46425
A630001G21Rik	0.546529	5.09355	1.92419	0.0724259	0.402909	-4.24429
Zmat2	0.286966	6.68817	1.9237	0.0724917	0.402909	-4.66093
Mob4	-0.232672	6.50915	-1.92351	0.0725175	0.402909	-4.66671
Ccng2	0.335283	6.30678	1.92219	0.0726954	0.403613	-4.53355
Ebp	0.275954	6.5444	1.91994	0.0729972	0.404549	-4.61423
Ddx49	-0.581575	4.53854	-1.91945	0.0730641	0.404549	-4.23107
Slc4a1ap	-0.431109	5.40253	-1.9192	0.0730982	0.404549	-4.38723
Psma2	-0.183785	7.92208	-1.91896	0.07313	0.404549	-5.07259
Rundc3b	-0.658201	4.75603	-1.91871	0.0731635	0.404549	-4.29657
Rrp9	-0.468221	4.80055	-1.91865	0.0731718	0.404549	-4.28326
Lamtor3	0.428712	5.60322	1.91699	0.073397	0.405354	-4.35831
Gm45871	-0.592391	3.7276	-1.91665	0.0734432	0.405354	-4.13589
Drg2	0.606021	4.40724	1.91614	0.0735119	0.405354	-4.14525
Acp6	0.963909	3.55299	1.91576	0.073563	0.405354	-4.06234
Traf7	0.31853	6.05412	1.91496	0.0736726	0.405354	-4.47726
Ergic1	-0.562101	3.88053	-1.91492	0.0736779	0.405354	-4.14707
Psmd7	-0.327801	6.25545	-1.91463	0.0737171	0.405354	-4.62828
Actr5	0.44406	5.02848	1.91455	0.0737287	0.405354	-4.25683
Psmb4	-0.218191	7.11759	-1.91402	0.0737999	0.405463	-4.86249
Wsb1	-0.297889	6.03669	-1.91343	0.0738803	0.405621	-4.56371
Dctn6	-0.239857	6.78698	-1.9126	0.0739939	0.405826	-4.77397
Gse1	0.599287	5.14393	1.91204	0.0740709	0.405826	-4.27572
Fam118b	-0.587917	4.60425	-1.9119	0.0740889	0.405826	-4.26166
Nt5c3	-0.409863	5.45398	-1.91165	0.0741234	0.405826	-4.43128
Etv3	-0.754264	3.14161	-1.91118	0.0741885	0.4059	-4.08179
Supt5	-0.250881	7.16006	-1.91056	0.0742729	0.405972	-4.87172
Ndufa13	-0.121927	8.72159	-1.91033	0.0743047	0.405972	-5.28818
Leng8	-0.248558	6.68359	-1.90995	0.0743563	0.405973	-4.75138
Nudt21	0.283227	6.58015	1.90894	0.0744951	0.40645	-4.64476
Puf60	-0.185636	7.8896	-1.9083	0.0745837	0.406651	-5.07925
Fam133b	-0.395903	5.8101	-1.90639	0.0748466	0.407803	-4.52477
Eml3	0.34369	6.50353	1.90588	0.0749163	0.407824	-4.6166
Cd48	0.153619	9.68139	1.90561	0.0749539	0.407824	-5.4966
Imp4	-0.43523	5.95943	-1.9046	0.0750936	0.408302	-4.56045
Tubgcp4	0.458276	5.19544	1.90388	0.0751931	0.40854	-4.29178
Tada1	-0.365639	5.71674	-1.90353	0.075241	0.40854	-4.49649
Gimap4	-0.251086	9.63808	-1.90315	0.0752946	0.40855	-5.51749
Khnyn	-0.310361	6.02031	-1.90261	0.0753689	0.40857	-4.58067
Sgk1	0.207126	8.9813	1.90237	0.075402	0.40857	-5.34046
Trim30d	-0.707524	4.19952	-1.89999	0.0757331	0.410082	-4.2108
Cyth1	-0.234139	6.81929	-1.89915	0.0758511	0.410439	-4.79377
Zfp277	0.451213	5.17579	1.8981	0.0759972	0.410835	-4.31261
Tppp3	1.22664	2.30451	1.89788	0.0760284	0.410835	-4.04074
Gnl1	-0.48787	4.93019	-1.89749	0.0760831	0.410849	-4.34192
Litaf	0.888549	4.3084	1.89658	0.0762095	0.411113	-4.14556
Pdia3	-0.134258	8.41767	-1.89633	0.0762453	0.411113	-5.23349
Dhrs1	0.463051	5.31695	1.89602	0.0762884	0.411113	-4.33002
Snx6	-0.336413	6.38141	-1.89498	0.0764352	0.411437	-4.68613
Slc26a2	-0.571458	4.07365	-1.89458	0.0764917	0.411437	-4.2059
Exosc5	-0.319702	5.80698	-1.89448	0.0765052	0.411437	-4.52624
Fam169b	-0.643533	3.90145	-1.89354	0.0766375	0.411868	-4.19056
Rab11b	-0.182498	7.38833	-1.89234	0.0768064	0.412494	-4.96734
Chchd1	-0.32871	5.95573	-1.89089	0.0770112	0.413266	-4.57435
Dnaja1	-0.479045	8.05023	-1.89058	0.077055	0.413266	-5.1799
Csgalnact2	0.650835	4.51729	1.89018	0.0771118	0.41329	-4.20339
Trp53bp1	-0.389308	5.36735	-1.88962	0.077192	0.413439	-4.43434
Sh2d1a	0.356918	7.17862	1.88908	0.0772675	0.413562	-4.83505
Slc25a12	0.439301	5.61748	1.88719	0.0775367	0.414721	-4.40531
Ogfod2	-0.521058	4.91426	-1.88661	0.077619	0.41485	-4.357
Mrpl46	-0.416286	4.73774	-1.88628	0.0776661	0.41485	-4.31366
Arih2	0.339164	5.84437	1.88573	0.0777448	0.414854	-4.47179
Car5b	0.634547	5.75401	1.88532	0.0778034	0.414854	-4.42111
Golga4	-0.348615	6.63311	-1.88517	0.0778246	0.414854	-4.7798
Slc25a53	0.733027	3.88789	1.88448	0.0779231	0.414973	-4.12909
Tnfrsf25	-1.29732	5.06996	-1.88428	0.0779521	0.414973	-4.46741
Knop1	-0.581906	4.89114	-1.88373	0.0780313	0.415114	-4.35869
Bcl11b	0.292113	7.61697	1.88191	0.0782916	0.416218	-4.9898
Stx1a	-0.704477	3.78746	-1.88116	0.0783992	0.416387	-4.20079
Cd44	-0.447449	5.74647	-1.88035	0.0785161	0.416387	-4.54973
Ust	-0.787134	5.17564	-1.8803	0.0785227	0.416387	-4.4438
Leprot	0.446091	5.74218	1.88022	0.0785346	0.416387	-4.45029
Atp1b3	-0.130057	9.48993	-1.8795	0.0786388	0.416659	-5.51843
Trappc11	-0.386443	5.18868	-1.87767	0.0789031	0.417726	-4.41396
Mtpn	0.232044	7.25261	1.87737	0.0789463	0.417726	-4.90337
Cma1	2.26135	3.57588	1.87635	0.0790934	0.418224	-4.07961
Tmem104	-0.481276	5.12544	-1.87516	0.0792667	0.41886	-4.41788
4930523C07Rik	-0.653065	3.67265	-1.87447	0.0793667	0.419083	-4.19174
Tagln2	-0.259022	8.84458	-1.87413	0.0794153	0.419083	-5.38648
Ywhaz	0.124996	9.42276	1.87367	0.0794837	0.419163	-5.4934
Ubl5	0.220842	8.23436	1.87302	0.0795772	0.419354	-5.18188
Cyth2	-0.315404	5.71597	-1.87238	0.0796704	0.419354	-4.5379
Nepro	0.775819	2.85749	1.87198	0.0797293	0.419354	-4.08234
Gpr55	-0.974775	3.2203	-1.87196	0.0797325	0.419354	-4.15604
Spsb3	0.361235	6.18772	1.8703	0.0799748	0.41986	-4.58323
Malt1	-0.183218	7.33716	-1.87023	0.0799848	0.41986	-4.98459
Lamp2	0.57749	4.65655	1.86958	0.0800809	0.41986	-4.24822
Lemd3	-0.553779	4.30481	-1.86942	0.0801041	0.41986	-4.28136
Ptpn18	0.134073	9.76595	1.86928	0.0801248	0.41986	-5.57305
Dnaja3	-0.508274	4.56516	-1.86908	0.0801528	0.41986	-4.31848
Prps1l3	-0.376147	5.47248	-1.86873	0.0802043	0.41986	-4.49191
Il2rg	0.168905	9.60744	1.86839	0.0802549	0.41986	-5.54093
Eif5a	-0.163693	8.73954	-1.86782	0.0803383	0.4199	-5.3686
P3h4	0.699466	4.05789	1.86761	0.0803691	0.4199	-4.17072
Pole2	-0.777198	3.52141	-1.86621	0.0805759	0.420126	-4.19548
Dstn	0.409748	5.57897	1.866	0.0806067	0.420126	-4.43565
Tmem115	-0.327428	5.65675	-1.86579	0.0806368	0.420126	-4.52954
Cenpa	0.508027	5.19342	1.86535	0.0807024	0.420126	-4.35704
Scoc	-0.538947	4.40916	-1.86505	0.0807469	0.420126	-4.29933
Irf4	1.19243	3.53061	1.86504	0.0807482	0.420126	-4.11983
Dhx9	-0.23112	7.26259	-1.86465	0.0808062	0.420126	-4.97753
Traf1	-0.340392	6.13437	-1.86388	0.0809199	0.420126	-4.6828
Fpgt	-0.680832	3.95695	-1.86386	0.0809228	0.420126	-4.24133
Hspa1b	1.40406	2.84464	1.86371	0.0809451	0.420126	-4.0878
Rfx7	0.393843	5.85306	1.86197	0.0812026	0.421007	-4.51468
Zfp746	0.557901	5.28945	1.86184	0.0812218	0.421007	-4.37
Utrn	-0.248291	7.39732	-1.86002	0.0814912	0.421084	-5.02943
Cyb561d2	0.527223	4.97875	1.85977	0.081529	0.421084	-4.31751
Kif18a	0.735139	2.7043	1.85946	0.0815759	0.421084	-4.09391
Lpin1	-0.335316	7.04384	-1.8594	0.0815837	0.421084	-4.93895
Eef1e1	-0.366445	5.40153	-1.85917	0.0816182	0.421084	-4.48457
Tspyl4	-0.486356	4.17924	-1.85896	0.0816505	0.421084	-4.26702
Tomm40	-0.416646	5.5437	-1.85891	0.0816569	0.421084	-4.5135
Hyou1	-0.38276	5.34285	-1.85887	0.0816638	0.421084	-4.47838
Med12l	0.868418	4.28065	1.85768	0.0818413	0.421724	-4.2078
Psmb1	0.169083	8.40217	1.85731	0.0818956	0.421728	-5.2613
Clip1	-0.304265	6.00064	-1.85647	0.0820219	0.422102	-4.63249
Galnt10	0.382597	5.80995	1.85467	0.0822914	0.422961	-4.5065
Pnn	0.191102	7.51946	1.85464	0.0822961	0.422961	-5.01468
Tmem87b	-0.423407	4.74999	-1.85393	0.082402	0.42323	-4.36913
Gm20708	-0.587665	3.73863	-1.85357	0.0824565	0.423234	-4.22393
Anks1	-0.562358	4.27774	-1.85318	0.0825147	0.423257	-4.29833
Ccdc6	0.998253	2.94828	1.85206	0.0826843	0.423851	-4.10955
Prmt1	-0.229861	6.5663	-1.85139	0.0827848	0.424091	-4.79969
Zfp787	0.754684	4.5264	1.84966	0.0830463	0.425049	-4.23905
Eci2	0.470311	4.87526	1.84944	0.0830797	0.425049	-4.32835
Mnt	-0.460167	5.1502	-1.84873	0.0831873	0.425323	-4.45727
Atp13a2	0.616201	4.37388	1.84828	0.0832552	0.425395	-4.23636
Rbks	-0.547456	3.85398	-1.84683	0.0834765	0.426249	-4.2473
0610030E20Rik	-0.404449	5.6525	-1.84573	0.0836426	0.426773	-4.5762
Prdx4	0.666904	5.65075	1.84544	0.0836874	0.426773	-4.46105
Rrp12	-0.828387	3.23221	-1.8444	0.0838461	0.427175	-4.18173
Pop7	-0.37324	5.70236	-1.84421	0.0838746	0.427175	-4.5852
Med16	0.692639	3.89917	1.84076	0.0844039	0.429594	-4.19686
Csnk1g3	0.541958	5.26998	1.84012	0.084502	0.429815	-4.39015
Ccdc12	0.164589	7.97227	1.83898	0.0846767	0.430111	-5.17271
Ncor2	-0.356781	5.7882	-1.83868	0.0847237	0.430111	-4.61377
Eno1	-0.20207	8.49498	-1.83867	0.0847239	0.430111	-5.36016
Cbx8	-0.645149	4.17811	-1.838	0.0848275	0.43036	-4.29523
Ppil3	0.355445	5.93844	1.83647	0.0850648	0.431115	-4.56565
Tmem268	-0.624494	3.64371	-1.83633	0.0850855	0.431115	-4.24076
Nfatc3	-0.177323	8.48071	-1.83574	0.0851771	0.431301	-5.35325
Fnbp4	-0.296261	6.70288	-1.83493	0.0853021	0.431657	-4.87873
Exosc2	-0.515883	4.00148	-1.83322	0.0855682	0.432726	-4.28074
Scfd1	0.522898	4.96865	1.83228	0.0857146	0.432944	-4.36829
Pigc	0.509227	4.6966	1.83223	0.0857211	0.432944	-4.31593
Chfr	0.233797	6.81727	1.8314	0.0858507	0.433064	-4.84396
Ehbp1l1	0.242209	6.82011	1.83115	0.0858893	0.433064	-4.84134
Emc10	-0.25926	7.07807	-1.83102	0.0859097	0.433064	-4.98856
Gypc	0.598891	4.32099	1.83022	0.0860352	0.433419	-4.2599
Nln	0.602692	4.28454	1.82934	0.086173	0.433836	-4.25742
Cept1	-0.521506	5.10806	-1.82836	0.0863264	0.434299	-4.48946
Xrcc5	-0.591919	3.7578	-1.82801	0.0863816	0.434299	-4.26162
2300009A05Rik	-0.276006	6.02319	-1.82758	0.0864481	0.434299	-4.69149
Git1	0.636917	2.97721	1.82734	0.0864852	0.434299	-4.14736
Clcn6	-0.650596	3.47674	-1.82673	0.0865818	0.434507	-4.23346
Mettl6	0.970228	3.28369	1.82554	0.0867685	0.435107	-4.15615
D6Wsu163e	-0.67859	3.32074	-1.82527	0.0868117	0.435107	-4.21446
Otulin	0.284735	6.73722	1.82327	0.0871264	0.435859	-4.82759
Trappc13	0.553195	4.63277	1.82312	0.0871497	0.435859	-4.32174
Eml2	0.525632	4.46133	1.82297	0.0871742	0.435859	-4.29741
Adcy7	-0.259615	7.28676	-1.82262	0.0872291	0.435859	-5.04901
Kremen1	-0.670827	3.28333	-1.82256	0.0872382	0.435859	-4.21983
Vti1b	-0.197631	7.10602	-1.82178	0.0873624	0.436204	-4.99556
Bsg	-0.206973	7.61191	-1.82093	0.0874959	0.436594	-5.13702
Tab3	0.678428	3.07941	1.82046	0.0875709	0.436691	-4.16114
Dse	-0.561164	4.84976	-1.82004	0.087638	0.43675	-4.43458
Zfp62	-0.338852	5.54147	-1.81916	0.0877769	0.436962	-4.57812
R3hdm2	0.332762	6.18711	1.81907	0.0877915	0.436962	-4.67172
Zfhx2	-0.49187	5.47195	-1.81815	0.0879375	0.437413	-4.57539
Srcin1	-1.2344	3.06887	-1.81744	0.0880511	0.437702	-4.21126
Arl5a	0.363616	5.79718	1.81608	0.0882688	0.438152	-4.55562
Rbm19	-0.572753	4.32569	-1.81604	0.0882745	0.438152	-4.36097
Dera	0.442005	5.26421	1.81583	0.0883084	0.438152	-4.44259
Cep104	-0.599301	4.03613	-1.81504	0.0884343	0.438414	-4.31639
Rcbtb2	0.601626	4.87823	1.8148	0.0884724	0.438414	-4.35961
Fkbp4	-0.327585	7.20353	-1.81394	0.0886115	0.438606	-5.05758
Atp6v1a	0.425657	5.28343	1.81387	0.0886225	0.438606	-4.45329
Mrpl24	0.319025	6.547	1.81239	0.0888598	0.43934	-4.77298
Pdzd11	0.678743	4.40916	1.81194	0.0889324	0.43934	-4.30095
Agpat1	0.393535	5.33698	1.8119	0.088938	0.43934	-4.46739
Ttc5	-0.343339	6.02737	-1.81054	0.0891579	0.440111	-4.71481
Srbd1	0.630805	4.20354	1.81024	0.0892057	0.440111	-4.27514
Pigu	-0.557515	3.6007	-1.80947	0.0893299	0.440432	-4.26934
Kctd18	-0.427202	4.54051	-1.80906	0.0893959	0.440432	-4.40025
Cd3g	-0.13021	9.87444	-1.8088	0.0894384	0.440432	-5.71276
Med18	-0.610798	3.77399	-1.80835	0.0895108	0.440514	-4.29818
Sash3	0.192731	8.11345	1.80763	0.0896274	0.440813	-5.25911
Cc2d1a	-0.429947	5.33121	-1.80727	0.0896855	0.440823	-4.54935
Tuba4a	-0.389429	5.77613	-1.80556	0.0899636	0.441915	-4.66381
Uqcc3	0.298659	6.1391	1.80342	0.0903107	0.443263	-4.67634
Fam172a	-0.226778	6.47692	-1.80318	0.0903505	0.443263	-4.84657
Tnfrsf13c	0.913982	2.91596	1.80129	0.0906589	0.444098	-4.17316
Gm5617	1.01162	2.83359	1.80087	0.090728	0.444098	-4.16661
Zdhhc16	0.63664	4.21036	1.80025	0.0908298	0.444098	-4.29138
Otud1	-0.460903	5.33677	-1.80017	0.0908422	0.444098	-4.58029
Gfm2	0.59208	3.89798	1.80006	0.0908607	0.444098	-4.25515
H13	-0.232577	7.43655	-1.79998	0.0908738	0.444098	-5.1375
Taf12	0.347038	6.11222	1.79925	0.0909933	0.444098	-4.66086
Tpp2	0.243197	7.26145	1.79904	0.0910273	0.444098	-5.02457
Atf7	-0.460233	4.67299	-1.79887	0.0910553	0.444098	-4.43224
Btbd19	-0.522959	4.68168	-1.7987	0.091084	0.444098	-4.44214
Fam13b	-0.271393	6.6246	-1.79775	0.0912386	0.444577	-4.90659
Crlf3	-0.237336	7.45467	-1.79684	0.091389	0.445022	-5.13941
Amer1	-0.679007	3.32467	-1.79646	0.091451	0.445022	-4.25753
Ptprs	1.10633	2.26883	1.79591	0.0915425	0.445022	-4.16435
Ndufaf8	-0.364732	5.85064	-1.79583	0.0915558	0.445022	-4.69039
Arfgap3	0.699967	4.02873	1.79534	0.0916357	0.445123	-4.27353
Lyn	1.00815	2.25668	1.79456	0.0917657	0.445123	-4.16549
Gtf2ird2	-0.590626	3.47585	-1.79399	0.0918599	0.445123	-4.26714
Ccndbp1	0.274527	6.91364	1.79343	0.091953	0.445123	-4.93196
Sav1	-0.451264	5.07261	-1.79339	0.0919595	0.445123	-4.51898
Elovl1	0.316673	6.06878	1.79337	0.0919624	0.445123	-4.66793
Prdx1	0.192949	8.226	1.79291	0.0920382	0.445123	-5.31292
Prim1	-0.54295	3.82892	-1.79286	0.0920464	0.445123	-4.31217
Tob1	0.517925	6.36726	1.79212	0.0921687	0.445123	-4.71979
Sra1	-0.241736	7.08071	-1.79209	0.0921753	0.445123	-5.04844
Incenp	0.410557	5.22828	1.79195	0.0921976	0.445123	-4.48176
Vsir	0.22376	7.92989	1.79147	0.092277	0.445233	-5.22292
Ets1	0.133883	9.19366	1.79093	0.0923664	0.445393	-5.57173
Nsmce3	-0.362649	5.89003	-1.79041	0.0924539	0.445542	-4.71688
Ilf2	-0.298639	5.76749	-1.79006	0.0925115	0.445547	-4.66809
N4bp3	-0.430401	4.99245	-1.78866	0.0927444	0.446318	-4.51413
Safb	-0.344539	6.53561	-1.78811	0.092837	0.446318	-4.89892
Kcnc1	0.875715	3.43219	1.78808	0.0928413	0.446318	-4.22079
Sec61b	0.142235	8.7113	1.78704	0.0930162	0.446722	-5.45963
Lrrc59	-0.369993	5.71942	-1.7869	0.0930387	0.446722	-4.67201
Stk38	-0.168199	8.05707	-1.78647	0.0931119	0.446801	-5.317
Capns1	0.2306	8.12086	1.78505	0.093349	0.447667	-5.29063
Slc25a32	-0.467482	4.54674	-1.7847	0.0934075	0.447675	-4.43088
Xpc	-0.488053	4.70461	-1.78319	0.0936621	0.448622	-4.46022
Ino80c	0.633954	4.10853	1.78164	0.0939235	0.449601	-4.29037
Cad	0.660849	3.63669	1.78125	0.0939882	0.449638	-4.25332
Eif2b1	0.573097	4.48485	1.78017	0.0941722	0.450068	-4.35025
Uba1	0.20507	7.35003	1.78005	0.0941922	0.450068	-5.07804
Pi4k2a	0.41354	5.37533	1.77923	0.0943308	0.450457	-4.51708
Mnat1	-0.538571	3.57056	-1.7788	0.0944028	0.450528	-4.30267
Snrpd1	-0.273657	6.36728	-1.77841	0.0944691	0.450571	-4.86208
Abcd1	0.386999	5.19082	1.77617	0.0948499	0.452075	-4.49278
Cdon	-0.719738	3.47551	-1.77571	0.0949286	0.452075	-4.3022
Thoc6	0.845236	3.57275	1.77554	0.0949565	0.452075	-4.24485
Polr2h	-0.44374	4.68899	-1.7749	0.0950656	0.452174	-4.4741
Mrps18a	-0.367112	5.60291	-1.77475	0.095092	0.452174	-4.65312
Cdc14b	0.829068	3.70584	1.77417	0.0951903	0.452369	-4.25965
Actr6	-0.512422	4.46089	-1.77343	0.0953164	0.452695	-4.43195
Ube3c	-0.340963	5.66452	-1.7721	0.0955454	0.45325	-4.67658
Mbtd1	-0.412558	4.93421	-1.7719	0.0955785	0.45325	-4.51322
Gnai2	0.139221	9.75481	1.77174	0.0956057	0.45325	-5.72511
Fosl2	0.602741	4.25702	1.77131	0.0956794	0.453327	-4.33079
E4f1	-0.455908	5.58437	-1.77051	0.0958168	0.453531	-4.65351
Xlr4c	1.81403	2.40148	1.76956	0.0959815	0.453531	-4.1967
Pcbp1	-0.172902	8.18039	-1.7695	0.0959911	0.453531	-5.37888
Tmbim1	-0.56493	4.05109	-1.76921	0.096041	0.453531	-4.38049
Rock2	-0.308352	6.19778	-1.76916	0.0960497	0.453531	-4.8276
Gadd45gip1	-0.275005	6.41529	-1.76905	0.0960676	0.453531	-4.88414
Ankhd1	-0.238387	6.62606	-1.76801	0.0962482	0.454112	-4.95497
Camta1	0.479264	4.44139	1.76689	0.0964401	0.454745	-4.37028
Erlin2	-0.575515	3.69686	-1.76635	0.096534	0.454818	-4.33104
Vps36	0.231859	6.68428	1.76586	0.0966183	0.454818	-4.89915
Pdzd8	-0.254432	6.27158	-1.76554	0.0966745	0.454818	-4.85221
Dek	-0.181726	7.86061	-1.76511	0.0967483	0.454818	-5.30126
Bcl10	-0.262841	6.33645	-1.76485	0.0967937	0.454818	-4.87008
Usp28	-0.617467	3.16242	-1.7648	0.0968017	0.454818	-4.27542
Simc1	-0.619748	4.46896	-1.76352	0.0970237	0.455129	-4.45438
Birc3	-0.35475	5.22661	-1.76336	0.0970511	0.455129	-4.58843
Tmco3	0.688355	3.70183	1.76291	0.0971309	0.455129	-4.2734
Rdh14	-0.547276	4.76342	-1.7624	0.0972185	0.455129	-4.49793
Tubg1	-0.406244	4.87364	-1.76234	0.097229	0.455129	-4.52423
Sucla2	-0.302434	6.08829	-1.76216	0.0972609	0.455129	-4.8063
Slc7a6os	0.583712	4.49616	1.76209	0.0972719	0.455129	-4.38776
Zc3h3	-0.474877	4.70977	-1.76096	0.0974695	0.455783	-4.49125
Brk1	0.178328	7.55948	1.75928	0.0977633	0.456886	-5.1772
Tmed4	-0.404879	5.28574	-1.75838	0.0979204	0.456978	-4.62057
Dennd4c	0.444915	5.7459	1.75821	0.0979494	0.456978	-4.61806
Hsdl2	-0.49676	4.6852	-1.75721	0.098125	0.456978	-4.49269
Smc3	-0.203515	7.12396	-1.75706	0.0981504	0.456978	-5.10459
Ttc17	-0.311184	5.78806	-1.75699	0.098164	0.456978	-4.72607
Creg1	-0.460718	4.79247	-1.75688	0.0981834	0.456978	-4.5244
Thy1	0.126924	10.8989	1.75685	0.0981889	0.456978	-5.96614
Stat5a	-0.322576	5.46547	-1.75612	0.0983159	0.4573	-4.64417
Itgb2	0.126078	10.2435	1.7554	0.0984429	0.45762	-5.85053
Utp18	-0.372431	5.62589	-1.75462	0.0985805	0.45799	-4.69629
Ifitm10	0.24408	8.90994	1.75279	0.0989025	0.459215	-5.5521
Bcr	-0.876132	3.42263	-1.75222	0.099003	0.459345	-4.3365
Ehmt2	0.251463	6.26991	1.75197	0.0990469	0.459345	-4.7961
Ccdc85b	-0.246532	6.73012	-1.75001	0.0993947	0.460687	-5.00978
Rbmxl1	-0.312418	5.60425	-1.749	0.0995744	0.461248	-4.68749
Smg6	-0.275827	6.00878	-1.74839	0.0996822	0.461318	-4.79154
Nr2c2	0.458094	5.75953	1.74792	0.0997653	0.461318	-4.62604
Atg4b	-0.342351	5.60672	-1.7479	0.0997683	0.461318	-4.69344
Ubr3	0.396521	5.20065	1.74759	0.0998235	0.461318	-4.53395
Aff4	-0.335748	6.1235	-1.74462	0.100354	0.463496	-4.83112
Zfp953	-0.651028	3.01542	-1.74225	0.100779	0.465169	-4.28856
Mapk8ip3	-0.360532	5.32441	-1.74176	0.100866	0.465169	-4.6408
Hsf2	-0.742581	2.88755	-1.74147	0.100918	0.465169	-4.28246
Dmxl1	-0.31047	5.47006	-1.74128	0.100952	0.465169	-4.66823
Dixdc1	1.45525	2.35203	1.73784	0.101573	0.467526	-4.23432
Mcat	-0.442491	4.53223	-1.73737	0.101658	0.467526	-4.49519
Rac3	0.805283	4.14618	1.73699	0.101727	0.467526	-4.35759
Mrpl51	-0.373148	5.23964	-1.7369	0.101743	0.467526	-4.63087
Uba5	0.456653	5.1883	1.7368	0.10176	0.467526	-4.531
Pcid2	-0.364584	5.07004	-1.73648	0.101819	0.467527	-4.5899
Rnf40	-0.407974	5.64818	-1.7356	0.101978	0.46797	-4.74162
D16Ertd472e	-0.204474	7.23786	-1.73529	0.102035	0.46797	-5.177
Syne1	0.444814	5.79956	1.7348	0.102123	0.468105	-4.6782
Arl2bp	0.196305	7.79953	1.73364	0.102335	0.468308	-5.2857
Bak1	0.352356	5.92109	1.73313	0.102427	0.468308	-4.71192
Rars	-0.359923	5.07912	-1.73309	0.102434	0.468308	-4.59493
BC005537	-0.315885	5.89429	-1.73293	0.102462	0.468308	-4.79315
Slc35b3	-0.366287	5.35972	-1.73258	0.102527	0.468308	-4.6633
Pik3r4	-0.358365	4.89375	-1.7322	0.102596	0.468308	-4.56362
Tmsb4x	0.0938997	13.5103	1.73198	0.102635	0.468308	-6.42255
Zmiz2	-0.455894	4.64152	-1.73172	0.102684	0.468308	-4.523
Lrwd1	0.353427	5.49778	1.73151	0.102721	0.468308	-4.61724
Neu1	0.584772	4.64267	1.73129	0.102762	0.468308	-4.44977
Aars	0.433277	5.92173	1.73089	0.102835	0.468372	-4.71767
Gngt2	0.613486	3.67388	1.73049	0.102907	0.468431	-4.3191
Rbm6	-0.246311	6.6383	-1.72891	0.103197	0.469153	-5.00933
Tgfb1	0.1949	7.32841	1.72872	0.103233	0.469153	-5.15377
Psmd11	-0.193968	6.83265	-1.72841	0.103288	0.469153	-5.05953
Tmem164	0.484065	4.74885	1.72827	0.103315	0.469153	-4.48102
Fam162a	-0.407955	5.58959	-1.728	0.103364	0.469153	-4.73265
Cars	0.763567	3.09538	1.72672	0.103599	0.469655	-4.27251
Psmd8	0.201153	7.38453	1.7267	0.103602	0.469655	-5.1695
Yme1l1	-0.287186	6.49251	-1.72637	0.103663	0.469655	-4.988
Naa15	-0.297641	5.94026	-1.7261	0.103712	0.469655	-4.82195
Dkkl1	1.25104	3.99204	1.72545	0.103832	0.469896	-4.33493
Strn	0.463546	5.01019	1.72517	0.103885	0.469896	-4.51753
Sema4f	0.998926	4.53946	1.72425	0.104054	0.470194	-4.41767
Ggps1	-0.325213	6.4729	-1.72404	0.104092	0.470194	-4.9929
Cenpe	-0.802611	2.27805	-1.72368	0.104159	0.470194	-4.26812
Zfp839	0.875304	3.12778	1.72352	0.104189	0.470194	-4.27795
Prkcz	0.667221	4.91678	1.72272	0.104337	0.470592	-4.49242
Nbr1	-0.256916	6.04862	-1.72169	0.104528	0.470975	-4.851
Kin	0.449946	5.41718	1.72124	0.104612	0.470975	-4.59729
Fam234b	-0.691718	3.11597	-1.72119	0.10462	0.470975	-4.33638
Zmym2	-0.436322	5.39431	-1.72097	0.104661	0.470975	-4.68587
Slc25a5	0.13761	8.2029	1.72046	0.104756	0.471132	-5.42302
Wdr11	0.850028	3.72051	1.71992	0.104855	0.471309	-4.33302
Smim15	0.335402	5.8127	1.71861	0.105099	0.472135	-4.71518
Rfc1	-0.312329	5.61967	-1.71823	0.10517	0.472185	-4.73982
Lrrc61	0.466302	4.66959	1.71698	0.105404	0.472968	-4.48411
Snrpb2	0.423609	5.62272	1.71664	0.105467	0.472982	-4.66099
Rbm18	-0.395101	4.99045	-1.71546	0.105687	0.473401	-4.59866
Zfp955a	0.842063	2.82816	1.71527	0.105722	0.473401	-4.27346
Cic	-0.344113	5.82999	-1.71496	0.105781	0.473401	-4.79519
Ndufb3	-0.198001	7.01996	-1.7143	0.105904	0.473401	-5.14152
Dap3	-0.33464	5.76057	-1.71428	0.105908	0.473401	-4.79257
Nr1d2	-0.371944	5.51738	-1.71421	0.105921	0.473401	-4.71831
Pcca	-0.593257	3.5598	-1.71342	0.106069	0.473493	-4.38827
Plcg2	0.587401	3.72986	1.71329	0.106095	0.473493	-4.35544
Qars	0.270072	6.14343	1.71314	0.106122	0.473493	-4.81965
Lcn4	-1.21108	4.58006	-1.71166	0.1064	0.474467	-4.59144
Mthfd1l	-0.393292	4.93249	-1.71066	0.106589	0.47481	-4.59945
Shmt2	-0.406839	5.29517	-1.71023	0.10667	0.47481	-4.68749
B230219D22Rik	0.292348	6.42712	1.70873	0.106953	0.47481	-4.91674
Tmem131l	0.269203	6.60019	1.70869	0.106961	0.47481	-4.95448
Rasa3	-0.189048	8.68702	-1.70867	0.106964	0.47481	-5.59951
Rbsn	-0.51994	4.21284	-1.70866	0.106966	0.47481	-4.48934
Imp3	-0.20904	6.92244	-1.70845	0.107005	0.47481	-5.12229
Zbtb20	-0.638509	4.03436	-1.70834	0.107025	0.47481	-4.46601
Ints2	-0.835346	2.49967	-1.7083	0.107034	0.47481	-4.30146
Zfp738	-0.547788	4.5875	-1.70775	0.107138	0.47481	-4.55721
Qdpr	0.451896	5.88631	1.70774	0.107139	0.47481	-4.74049
Med13	0.444831	5.22452	1.70726	0.107231	0.474948	-4.59015
Morc3	-0.230858	6.44539	-1.70656	0.107364	0.475271	-4.98327
Rcc2	-0.420953	5.53738	-1.70507	0.107646	0.47615	-4.7448
Ccdc15	-0.45893	4.14819	-1.70487	0.107683	0.47615	-4.4756
Uvssa	-0.538966	4.16433	-1.70404	0.107842	0.476256	-4.48975
Opa3	-0.498427	4.23873	-1.7033	0.107982	0.476256	-4.49359
Sla	-0.398008	7.70571	-1.70314	0.108013	0.476256	-5.37194
Alkbh2	-0.393446	4.69127	-1.70288	0.108063	0.476256	-4.57119
Rpsa	0.108855	11.7965	1.70287	0.108064	0.476256	-6.19414
Nsmce2	-0.382483	5.6819	-1.70285	0.10807	0.476256	-4.79704
Slc39a3	1.01106	3.33907	1.70122	0.108379	0.477334	-4.32148
Cldnd1	-0.36355	5.94072	-1.70093	0.108436	0.477334	-4.85949
Reps1	0.729714	4.6839	1.70027	0.108562	0.477625	-4.48184
Enpp4	-0.743885	2.16075	-1.69931	0.108745	0.478162	-4.28557
Arhgap17	0.255462	6.34268	1.69852	0.108898	0.478567	-4.8991
Ptpn4	0.312551	6.40309	1.69818	0.108964	0.47859	-4.9076
Arrb2	0.240124	7.52176	1.69671	0.109245	0.47956	-5.25811
Pim2	-0.502073	5.06455	-1.69597	0.109387	0.479916	-4.66186
Med27	-0.4044	5.25205	-1.69529	0.10952	0.47993	-4.69111
Mtmr14	-0.36077	5.27645	-1.69521	0.109534	0.47993	-4.70133
Tmem165	0.281672	6.52928	1.69501	0.109573	0.47993	-4.96046
Tktl1	0.615446	6.11448	1.69323	0.109916	0.480926	-4.79161
Grk5	-0.782215	3.15981	-1.6932	0.109922	0.480926	-4.36496
Grcc10	-0.213288	8.07485	-1.69222	0.110112	0.481486	-5.48108
Nr4a1	-0.713509	5.25634	-1.69189	0.110177	0.481503	-4.73411
Rab40c	-0.419483	4.64316	-1.69148	0.110256	0.481582	-4.57271
Ankrd54	0.297138	6.04064	1.69074	0.1104	0.48166	-4.81769
Commd6	0.284391	6.35996	1.69028	0.11049	0.48166	-4.90847
Dynlt3	0.822674	3.14374	1.69023	0.110499	0.48166	-4.32528
Ccl9	1.23948	5.94238	1.69008	0.110527	0.48166	-4.67421
Ppm1m	0.462477	5.36807	1.68982	0.110579	0.48166	-4.63199
Bst2	-0.301267	6.48392	-1.68919	0.110701	0.481926	-5.04802
Npm3	0.214186	7.79912	1.68791	0.11095	0.482265	-5.34418
Ampd2	-0.400397	4.55573	-1.68769	0.110993	0.482265	-4.56438
Tmem42	-0.517421	3.39367	-1.68759	0.111014	0.482265	-4.40165
Arid3b	-0.244486	6.19538	-1.68754	0.111024	0.482265	-4.95146
Commd8	-0.228817	6.40298	-1.68645	0.111235	0.482755	-5.00129
Sdhaf2	0.332788	5.95594	1.68633	0.111259	0.482755	-4.79074
Zbtb8os	-0.318385	6.16112	-1.68559	0.111404	0.482776	-4.95221
Cyp51	0.754869	3.3596	1.68523	0.111475	0.482776	-4.34892
Nol8	0.441615	5.50444	1.68514	0.111491	0.482776	-4.67232
Dhrs11	-0.581026	3.4129	-1.68506	0.111509	0.482776	-4.39898
2810004N23Rik	-0.399293	5.14046	-1.68417	0.111683	0.483202	-4.69767
Brox	0.498881	4.22408	1.68393	0.11173	0.483202	-4.45642
Polr2m	-0.218273	6.98655	-1.68302	0.111908	0.483709	-5.18368
Rint1	-0.512882	4.62794	-1.68205	0.1121	0.484271	-4.60096
Igsf8	-0.452925	4.78379	-1.68135	0.112237	0.484599	-4.61074
Ccng1	0.216591	6.8091	1.68058	0.11239	0.484965	-5.07225
Pgp	-0.378457	5.99086	-1.68029	0.112445	0.484965	-4.89563
Dock2	0.117093	9.15744	1.6797	0.112562	0.485064	-5.73649
Rpl26	0.0980737	10.1901	1.67952	0.112598	0.485064	-5.96027
Lsm7	-0.30811	6.17284	-1.67908	0.112684	0.485064	-4.9702
Cwf19l2	-0.4085	4.93016	-1.67878	0.112744	0.485064	-4.63612
Fbrs	-0.407676	4.95663	-1.67862	0.112776	0.485064	-4.65157
Rala	-0.219609	6.50476	-1.67775	0.112948	0.485541	-5.04463
Zmpste24	0.617222	4.27421	1.67688	0.113121	0.485857	-4.45193
Irf8	-0.990035	3.31995	-1.67649	0.113197	0.485857	-4.43349
Nvl	0.457051	5.52122	1.67645	0.113206	0.485857	-4.68518
Hsd17b12	-0.512452	4.33983	-1.67554	0.113387	0.486369	-4.55687
mt-Cytb	-0.104713	11.1375	-1.67484	0.113526	0.486697	-6.14067
Tnfsf10	-0.371975	4.67926	-1.67407	0.113679	0.486914	-4.60072
Fam222b	-0.454234	4.25719	-1.67397	0.1137	0.486914	-4.53816
Tram2	0.928347	3.297	1.67332	0.11383	0.487151	-4.35313
Rnf10	0.194607	7.10194	1.67301	0.113892	0.487151	-5.17387
Zfp53	-0.470563	4.55154	-1.6726	0.113973	0.487151	-4.58416
Baz1b	-0.22875	6.92694	-1.67245	0.114002	0.487151	-5.17628
Cnst	-0.450969	4.34108	-1.6697	0.114553	0.489054	-4.56225
Frat1	-0.466128	4.05849	-1.66948	0.114596	0.489054	-4.51645
Sbf1	0.268399	6.37696	1.6693	0.114634	0.489054	-4.94381
Ifngr1	-0.262731	8.29596	-1.6671	0.115076	0.490516	-5.57207
Bin2	0.10939	9.53837	1.66697	0.115101	0.490516	-5.84101
Slc39a9	0.431105	4.38374	1.66651	0.115195	0.490583	-4.50296
Dcaf15	-0.321786	6.22683	-1.66628	0.115241	0.490583	-4.99965
Trmt6	-0.424826	5.63262	-1.66585	0.115327	0.490685	-4.82849
Kpna1	0.501028	5.09826	1.66511	0.115476	0.491052	-4.61899
Prkaca	-0.347544	5.23732	-1.66463	0.115574	0.491207	-4.73074
Rxrb	-0.266261	6.15478	-1.66383	0.115736	0.491272	-4.96757
Mapk9	0.488336	5.15661	1.66367	0.115769	0.491272	-4.64328
Fam117b	0.333803	5.74701	1.66363	0.115777	0.491272	-4.76815
Cst7	0.194513	8.15747	1.66264	0.115976	0.491553	-5.48885
Mob3a	-0.271208	7.2971	-1.66248	0.116009	0.491553	-5.30424
Gstm5	1.15772	2.95525	1.66232	0.116041	0.491553	-4.34059
Man1a	0.363888	5.83691	1.66207	0.116092	0.491553	-4.7809
Nfyc	0.375414	5.1784	1.66156	0.116196	0.49173	-4.64478
Brix1	-0.349044	5.69932	-1.66109	0.116291	0.491867	-4.84938
Yipf5	0.368576	5.29103	1.66077	0.116357	0.49188	-4.67516
Ice1	-0.374052	5.7612	-1.65992	0.116528	0.492074	-4.87069
Sh3bp5	-0.753463	3.20855	-1.65972	0.116569	0.492074	-4.41882
Adck5	-0.502236	4.15836	-1.65962	0.11659	0.492074	-4.53984
Snx27	-0.28323	5.50709	-1.65876	0.116765	0.492468	-4.79657
Pnrc2	0.298603	6.10062	1.65802	0.116916	0.492468	-4.88559
Parn	-0.391709	4.80256	-1.65797	0.116927	0.492468	-4.65319
Edem3	-0.462226	5.03174	-1.65794	0.116933	0.492468	-4.70415
Gaa	-0.576332	4.27381	-1.65732	0.117059	0.492736	-4.57504
Coa4	0.715006	3.5064	1.65669	0.117188	0.493014	-4.39101
Mkln1	0.408735	5.98774	1.65541	0.11745	0.493854	-4.85178
Usp3	0.193097	6.81273	1.65456	0.117625	0.49412	-5.11407
Adgrg1	1.16596	1.67126	1.65449	0.117639	0.49412	-4.32461
Grk4	0.590252	3.95331	1.65391	0.117758	0.494171	-4.44683
Gabpb1	-0.320959	4.85466	-1.65346	0.117849	0.494171	-4.65974
Kdelr1	0.227352	6.74515	1.65332	0.117879	0.494171	-5.08254
Mospd1	0.463911	5.15892	1.65321	0.117901	0.494171	-4.66069
Axin2	0.823426	2.41705	1.65197	0.118156	0.494974	-4.33309
Wdr55	-0.359606	5.12008	-1.65134	0.118287	0.495184	-4.72626
mt-Nd6	-0.319677	6.14069	-1.65112	0.118332	0.495184	-4.98454
Adal	-0.609999	3.50508	-1.65078	0.118402	0.495216	-4.46202
Sppl2a	0.288489	6.64622	1.65032	0.118498	0.495353	-5.05336
Hibadh	0.487856	5.37667	1.64993	0.118577	0.495424	-4.69991
Als2	-0.471022	3.67352	-1.64922	0.118724	0.495775	-4.47855
Ddb1	-0.211372	6.54829	-1.64873	0.118825	0.495932	-5.10032
Dus3l	-0.305116	5.31694	-1.64824	0.118927	0.496096	-4.76202
Hace1	0.464113	4.9586	1.6477	0.11904	0.496283	-4.61999
Cd160	0.741602	6.37101	1.64742	0.119098	0.496283	-4.92303
Polm	0.58594	4.91124	1.64609	0.119373	0.496804	-4.61341
Pcmtd2	0.391105	6.0631	1.64604	0.119384	0.496804	-4.88033
Mrps11	-0.432724	4.78608	-1.6459	0.119412	0.496804	-4.66471
Ddx21	-0.256697	6.86813	-1.64532	0.119533	0.497047	-5.2062
Setd1a	-0.462381	4.69516	-1.64493	0.119615	0.497123	-4.6601
Gpr132	-0.313382	6.29997	-1.64363	0.119885	0.497983	-5.04503
Gbp9	-0.466071	4.90416	-1.64286	0.120046	0.498058	-4.6911
Dlgap5	-0.655574	2.91637	-1.64242	0.120138	0.498058	-4.41027
Slc35a3	0.540582	4.31238	1.64228	0.120167	0.498058	-4.51615
Ash1l	-0.268953	6.37491	-1.64224	0.120176	0.498058	-5.05546
Senp3	-0.323141	5.45349	-1.64203	0.120219	0.498058	-4.81524
Wdr41	-0.432306	3.84864	-1.64111	0.120411	0.498595	-4.51501
Efcab14	0.39016	5.57008	1.64051	0.120538	0.498855	-4.76539
Ntmt1	-0.433003	4.22468	-1.63911	0.12083	0.499657	-4.57541
Bckdk	-0.441282	5.14355	-1.63895	0.120865	0.499657	-4.74381
Rps6	0.125651	9.69684	1.63861	0.120937	0.499657	-5.91634
Gfod1	0.444934	4.81279	1.6383	0.121002	0.499657	-4.61223
Foxo1	-0.208287	6.94229	-1.63755	0.121159	0.499657	-5.23577
Cep97	0.550623	4.66841	1.63749	0.121172	0.499657	-4.58267
Hpcal1	0.211888	6.68054	1.6372	0.121233	0.499657	-5.10314
Khdrbs1	-0.1553	7.77689	-1.63714	0.121246	0.499657	-5.46575
Grap	0.162074	7.62697	1.63687	0.121302	0.499657	-5.38161
Prpf18	0.482318	5.38625	1.63625	0.121432	0.499933	-4.7172
Riok3	-0.167596	6.95804	-1.63448	0.121807	0.500415	-5.23588
Mrpl2	-0.413399	5.15054	-1.63444	0.121815	0.500415	-4.7694
Mgst2	-0.75511	5.08138	-1.63408	0.121891	0.500415	-4.78684
Hdac5	0.63429	4.7909	1.63406	0.121896	0.500415	-4.59934
Chic1	0.646254	2.65692	1.63394	0.121922	0.500415	-4.36222
Zfp36l1	-0.227728	7.88881	-1.6339	0.12193	0.500415	-5.51249
Sp100	0.105275	9.93527	1.63281	0.122161	0.5011	-5.97901
Eef1g	0.145735	8.08937	1.6318	0.122375	0.501507	-5.52446
Lime1	0.212255	8.47132	1.63168	0.122401	0.501507	-5.62385
Sf1	-0.192442	7.89031	-1.63144	0.122451	0.501507	-5.5105
Tes	0.143899	7.89186	1.63027	0.122699	0.501777	-5.46698
Clk3	0.285742	6.49482	1.63014	0.122727	0.501777	-5.03432
Mrpl44	-0.326725	5.31171	-1.63004	0.122748	0.501777	-4.79002
Tnfrsf13b	0.65842	3.63589	1.62968	0.122826	0.501777	-4.45002
Ints4	-0.378651	4.84154	-1.62964	0.122835	0.501777	-4.70148
Atg12	0.37764	5.48456	1.62927	0.122913	0.501838	-4.75445
Mapk1ip1	-0.400132	4.50973	-1.62881	0.12301	0.501974	-4.63685
Zdhhc21	0.91069	3.46671	1.62839	0.123099	0.502022	-4.4133
Elob	-0.212563	8.61544	-1.62808	0.123165	0.502022	-5.71307
Neil1	0.889516	3.58796	1.62786	0.123213	0.502022	-4.4268
Phb2	0.273311	6.98377	1.62711	0.123373	0.502415	-5.19257
Mrps6	-0.438877	5.32166	-1.6264	0.123526	0.502777	-4.82049
Arhgef1	0.11853	9.11324	1.62583	0.123648	0.503015	-5.80391
Asb13	-0.481756	4.80592	-1.6255	0.123718	0.503039	-4.70051
Rfx5	0.692847	2.96069	1.62504	0.123816	0.503176	-4.39229
Prelid1	0.182891	7.93226	1.62424	0.123988	0.503616	-5.4869
Galk2	0.316971	5.18378	1.6222	0.124427	0.504459	-4.70965
S100a1	0.895	1.96799	1.62216	0.124436	0.504459	-4.36303
Ube2a	0.271237	6.36751	1.62181	0.124512	0.504459	-5.00802
Apmap	-0.413423	4.5067	-1.62178	0.124518	0.504459	-4.65092
Toe1	-0.389153	5.07016	-1.62169	0.124537	0.504459	-4.75339
Pyroxd1	0.565008	3.75326	1.62149	0.124579	0.504459	-4.46964
Grpel1	-0.254103	6.51718	-1.62059	0.124775	0.504753	-5.14446
St3gal6	-0.194748	7.83429	-1.62056	0.12478	0.504753	-5.50916
Tbx21	0.208298	9.14385	1.62006	0.124888	0.504933	-5.80579
Bbc3	-0.430369	4.83225	-1.61962	0.124984	0.50506	-4.71339
Rttn	-0.635074	2.9276	-1.6168	0.125594	0.507046	-4.44744
Ubxn7	-0.391924	5.4333	-1.61676	0.125604	0.507046	-4.84452
Jak2	0.242577	6.10322	1.61629	0.125705	0.507195	-4.95006
Slc35a1	-0.452177	4.14651	-1.61564	0.125846	0.507505	-4.59682
Ubr1	-0.358016	5.614	-1.61375	0.126257	0.508629	-4.90703
Cdc42	0.0818713	9.90583	1.61353	0.126305	0.508629	-6.0016
Extl3	-0.485813	4.12623	-1.61342	0.126329	0.508629	-4.5935
Rab9	0.619598	4.45286	1.61318	0.126383	0.508629	-4.55487
Ctnnb1	0.35297	6.5645	1.61269	0.126488	0.508736	-5.06601
Mfhas1	-0.939344	3.0753	-1.61246	0.126539	0.508736	-4.46938
Snx30	-0.659267	3.21912	-1.61188	0.126665	0.508985	-4.48513
Dpp8	0.362204	5.83838	1.61064	0.126937	0.509816	-4.87471
Ptpn23	-0.494603	4.03132	-1.6099	0.127099	0.510209	-4.58901
Clcn4	0.27678	6.4566	1.60869	0.127366	0.511019	-5.06378
Carhsp1	0.417169	5.03708	1.60838	0.127432	0.511026	-4.69096
Gngt1	-1.1276	1.28774	-1.60792	0.127535	0.511177	-4.35906
Chd2	-0.388866	5.53089	-1.60664	0.127817	0.512045	-4.88922
Cnih1	0.43951	4.94351	1.60424	0.128346	0.513905	-4.67093
Impa1	0.255977	6.33644	1.60281	0.128662	0.514701	-5.03752
Ctu2	0.455736	5.18926	1.60266	0.128695	0.514701	-4.73113
Rabep2	0.323106	5.91425	1.60246	0.128741	0.514701	-4.90286
Ubxn2b	-0.392656	5.33093	-1.60183	0.128879	0.5149	-4.85087
Zmiz1	0.156459	8.23006	1.60164	0.128921	0.5149	-5.60328
Phf3	-0.295461	6.2821	-1.601	0.129063	0.51509	-5.10401
Rad51d	0.474723	4.41443	1.60084	0.129099	0.51509	-4.59571
Gm10033	-0.444239	4.26582	-1.59894	0.129521	0.516155	-4.64321
Smc4	0.244873	6.61704	1.59834	0.129655	0.516155	-5.12603
Fgf13	-0.240616	6.63252	-1.59825	0.129676	0.516155	-5.20541
Gmppb	0.455248	4.26646	1.59824	0.129678	0.516155	-4.56733
Dpysl2	-0.333522	5.60747	-1.59817	0.129693	0.516155	-4.90946
Os9	0.210296	7.49671	1.59718	0.129915	0.51648	-5.38979
Clpb	-0.557248	3.38734	-1.59708	0.129936	0.51648	-4.51883
Icos	0.446129	5.47428	1.59692	0.129972	0.51648	-4.80676
F8a	-0.356003	5.5102	-1.596	0.130177	0.517037	-4.89522
Abcg1	-0.470833	4.84053	-1.59524	0.13035	0.51746	-4.74392
Parm1	-1.09377	1.51771	-1.59472	0.130464	0.51757	-4.37907
Syncrip	0.243655	6.54506	1.59453	0.130508	0.51757	-5.11485
Arl5b	-0.430606	4.66679	-1.59418	0.130586	0.517616	-4.71602
Stxbp2	0.630335	5.46995	1.5924	0.130986	0.518942	-4.75282
Mrpl21	-0.245973	6.34211	-1.59117	0.131263	0.51948	-5.13089
Zswim8	-0.30105	5.28427	-1.5909	0.131323	0.51948	-4.8403
Zbtb1	0.452861	6.19086	1.59069	0.131371	0.51948	-4.99111
1600012H06Rik	0.580991	4.07005	1.59063	0.131386	0.51948	-4.54746
Map1s	-0.379407	5.14137	-1.58901	0.131751	0.520663	-4.81867
Actn2	-0.776996	3.23248	-1.58814	0.131948	0.521179	-4.51576
Arhgef12	0.424219	5.63283	1.58747	0.132098	0.521212	-4.83949
Ptk2b	-0.212106	7.32271	-1.58733	0.132131	0.521212	-5.41096
Fem1b	-0.432596	4.32827	-1.58723	0.132154	0.521212	-4.65579
[truncated: 5,885 more rows]
