# Supplementary material
Source: Research Square preprint supplement (doi:10.21203/rs.3.rs-8304459/v1)
Supplement: Supplementary file 2 [file f1c235dd601dd66659176f32.xlsx]

## Sheet: Extended Data Table 1
Gene	P value	Avg log2 Fold Change	pct.1	pct.2	Adj. P value	T phenotype
Sell	0	8.51208	0.951	0.004	0	T_early
Tcf7	0	5.29196	0.945	0.043	0	T_early
Ccr7	0	9.27183	0.838	0.002	0	T_early
Ighm	0	6.31163	0.831	0.013	0	T_early
Nsg2	0	6.98647	0.782	0.007	0	T_early
Rgs10	0	4.50313	0.747	0.041	0	T_early
Rflnb	0	5.91858	0.494	0.008	0	T_early
Aff3	0	4.57056	0.494	0.016	0	T_early
Il6ra	0	6.59643	0.474	0.004	0	T_early
Tmem108	0	12.2457	0.419	0	0	T_early
Dapl1	0	9.96742	0.416	0.001	0	T_early
Id3	0	5.85569	0.403	0.007	0	T_early
St6gal1	0	10.2354	0.36	0	0	T_early
Treml2	0	7.93808	0.357	0.001	0	T_early
Tdrp	0	5.80559	0.347	0.005	0	T_early
Tnfsf8	0	5.44538	0.347	0.005	0	T_early
Socs3	0	4.28414	0.354	0.015	0	T_early
Pacsin1	0	5.85998	0.289	0.004	0	T_early
Mettl1	0	4.44932	0.269	0.008	0	T_early
Pecam1	0	4.72306	0.263	0.007	0	T_early
Igfbp4	0	10.4169	0.237	0	0	T_early
Gm14085	0	9.21085	0.227	0	0	T_early
Klra13-ps	0	5.48572	0.214	0.004	0	T_early
Vipr1	0	4.64851	0.192	0.004	0	T_early
Xcl1	0	4.68513	0.182	0.004	0	T_early
Ramp1	0	10.0267	0.175	0	0	T_early
Slc16a5	0	10.2977	0.175	0	0	T_early
H2-Ob	0	7.47039	0.172	0.001	0	T_early
Sh3pxd2a	0	7.65595	0.169	0	0	T_early
Myb	0	5.75071	0.146	0.002	0	T_early
Cxxc5	0	6.22675	0.143	0.001	0	T_early
Gm19705	0	4.6766	0.143	0.003	0	T_early
Ccr9	0	6.45209	0.133	0.001	0	T_early
Patj	0	5.82676	0.13	0.002	0	T_early
Gm43698	0	9.04561	0.123	0	0	T_early
Eng	0	8.80064	0.114	0	0	T_early
Ms4a4c	6.13683e-295	3.25812	0.562	0.057	3.23018e-290	T_early
Inpp4b	3.14654e-291	3.15381	0.578	0.061	1.65621e-286	T_early
Actn1	3.82884e-290	3.35262	0.789	0.12	2.01535e-285	T_early
Atp1b1	8.86787e-274	2.98774	0.442	0.038	4.66769e-269	T_early
Btla	9.98307e-274	3.99863	0.192	0.007	5.25469e-269	T_early
Kbtbd11	6.21764e-263	2.99581	0.542	0.059	3.27272e-258	T_early
Rapgef4	9.50235e-263	4.55074	0.123	0.003	5.00166e-258	T_early
Cd2ap	2.19022e-262	3.20621	0.328	0.022	1.15284e-257	T_early
Myc	2.3637e-257	3.30458	0.61	0.078	1.24416e-252	T_early
H2-Oa	6.17604e-240	5.24433	0.104	0.002	3.25082e-235	T_early
Tspan13	7.93423e-230	2.76706	0.565	0.071	4.17626e-225	T_early
Pmepa1	1.0281e-229	4.57372	0.117	0.003	5.4115e-225	T_early
Sh3bp5	8.98133e-225	2.92494	0.445	0.046	4.72741e-220	T_early
Il6st	3.9138e-218	2.94433	0.383	0.035	2.06007e-213	T_early
Smyd2	2.13724e-211	4.1838	0.136	0.005	1.12496e-206	T_early
Bcl2	1.37184e-208	2.76365	0.769	0.154	7.22083e-204	T_early
Dennd2d	7.09642e-203	2.66312	0.578	0.083	3.73527e-198	T_early
Rps20	5.161e-198	2.54501	1	0.945	2.71654e-193	T_early
Cd55	2.25952e-196	2.83708	0.386	0.039	1.18932e-191	T_early
Pkp4	1.86303e-194	3.6827	0.188	0.01	9.80625e-190	T_early
Rps16	7.17715e-191	1.53018	1	0.966	3.77776e-186	T_early
Rplp1	9.42977e-191	1.61802	1	0.965	4.96345e-186	T_early
Rps8	1.44326e-187	1.53099	1	0.971	7.59675e-183	T_early
Rpl13	1.89539e-185	1.36593	1	0.971	9.97655e-181	T_early
Hmgn1	3.6315e-185	2.39057	0.692	0.124	1.91148e-180	T_early
Rpl12	1.87858e-184	2.00908	1	0.905	9.88807e-180	T_early
Rps7	3.15403e-184	1.41711	1	0.962	1.66015e-179	T_early
Rps26	4.35117e-184	1.77115	1	0.943	2.29028e-179	T_early
Rps24	1.14108e-183	1.30495	1	0.969	6.00618e-179	T_early
Rps2	6.63665e-183	1.59575	1	0.964	3.49327e-178	T_early
Rps15a	7.40733e-183	1.32579	1	0.964	3.89892e-178	T_early
Rpl23	7.46838e-183	1.34811	1	0.967	3.93106e-178	T_early
Rps27a	9.01776e-182	1.24507	1	0.966	4.74659e-177	T_early
Rpl8	1.0793e-181	1.39147	1	0.966	5.68102e-177	T_early
Rpl35	3.07697e-181	1.88663	1	0.919	1.61959e-176	T_early
Rpl10	3.8841e-181	1.81335	1	0.899	2.04443e-176	T_early
Rpl28	6.04387e-181	1.71052	1	0.941	3.18125e-176	T_early
Rpsa	1.43626e-179	1.2901	1	0.975	7.55992e-175	T_early
Rpl36a	3.49115e-179	2.09004	1	0.843	1.8376e-174	T_early
Rps3a1	1.27927e-178	1.16268	1	0.968	6.73357e-174	T_early
Rps19	4.44288e-177	1.94888	1	0.924	2.33855e-172	T_early
Rps4x	4.53901e-177	1.23018	1	0.966	2.38915e-172	T_early
Apex1	9.36042e-177	3.02636	0.308	0.028	4.92695e-172	T_early
Mettl27	1.19032e-176	4.33321	0.11	0.004	6.26539e-172	T_early
Rps18	1.21702e-176	1.42008	1	0.954	6.40588e-172	T_early
Eef1a1	2.38811e-176	1.05634	1	0.981	1.25701e-171	T_early
Slamf6	3.22191e-176	2.72444	0.448	0.057	1.69588e-171	T_early
Rpl35a	6.97958e-176	1.56748	1	0.954	3.67377e-171	T_early
Rpl32	1.92675e-173	1.18518	1	0.965	1.01416e-168	T_early
Rps5	3.47208e-172	1.24679	1	0.966	1.82756e-167	T_early
Rpl15	4.625e-171	1.54383	0.997	0.934	2.43442e-166	T_early
Rras2	6.57682e-171	2.48891	0.552	0.086	3.46178e-166	T_early
Rpl10a	2.971e-169	1.33705	1	0.953	1.56381e-164	T_early
H2-DMa	3.18081e-169	3.45734	0.224	0.016	1.67425e-164	T_early
Rpl3	5.6958e-169	1.3684	1	0.95	2.99804e-164	T_early
Rplp0	1.3359e-167	1.12253	1	0.969	7.03167e-163	T_early
Rpl21	2.48918e-167	1.12161	1	0.968	1.31021e-162	T_early
Rps9	3.62439e-167	1.16156	1	0.965	1.90774e-162	T_early
Gm20324	5.81267e-165	2.81991	0.289	0.026	3.05956e-160	T_early
Rps10	6.96226e-165	1.00728	1	0.966	3.66466e-160	T_early
Pdk1	3.41392e-163	2.70691	0.344	0.037	1.79695e-158	T_early
Ifi208	5.04002e-163	2.46346	0.468	0.065	2.65286e-158	T_early
Hook1	6.49068e-163	3.94075	0.127	0.005	3.41643e-158	T_early
Rps29	7.0532e-162	1.64101	1	0.95	3.71252e-157	T_early
Rpl30	2.79094e-161	1.04078	1	0.964	1.46904e-156	T_early
Il4ra	2.99108e-161	2.56368	0.474	0.068	1.57438e-156	T_early
5730508B09Rik	1.77454e-160	2.61783	0.571	0.099	9.34045e-156	T_early
Rps28	7.05632e-160	1.74709	0.997	0.895	3.71416e-155	T_early
Rpl11	1.15944e-159	1.01744	1	0.967	6.10281e-155	T_early
Zfp296	1.17481e-159	3.66489	0.146	0.007	6.18373e-155	T_early
Rplp2	1.08171e-158	1.11151	1	0.96	5.69369e-154	T_early
Rpl9	8.49916e-158	0.938021	1	0.972	4.47362e-153	T_early
AC153495.1	3.60049e-156	3.7841	0.14	0.007	1.89515e-151	T_early
Eef1b2	6.48136e-156	1.42508	1	0.908	3.41153e-151	T_early
Srm	4.3333e-155	2.67258	0.409	0.053	2.28087e-150	T_early
Rpl37	1.81244e-154	1.23444	1	0.961	9.53995e-150	T_early
Rps3	9.86202e-154	0.882341	1	0.968	5.19097e-149	T_early
Rpl22	7.22548e-152	1.21452	1	0.938	3.80321e-147	T_early
Rpl27a	3.01972e-151	1.05094	1	0.963	1.58946e-146	T_early
Bambi-ps1	4.55342e-148	4.32423	0.13	0.006	2.39674e-143	T_early
Rps23	6.00395e-148	0.992605	1	0.961	3.16024e-143	T_early
Emb	1.86084e-147	2.08066	0.825	0.225	9.79474e-143	T_early
Rpl26	7.64757e-147	1.22998	1	0.946	4.02538e-142	T_early
Rps6	2.98476e-145	1.33404	1	0.908	1.57106e-140	T_early
Bmyc	6.62539e-145	3.08221	0.214	0.017	3.48734e-140	T_early
Retreg1	8.64961e-144	2.46309	0.409	0.057	4.55281e-139	T_early
Rps12	6.14019e-143	1.30327	0.997	0.95	3.23195e-138	T_early
Rpl17	4.48295e-142	0.967628	1	0.965	2.35964e-137	T_early
Rpl39	4.9217e-140	1.34682	1	0.944	2.59058e-135	T_early
Rps21	6.55922e-140	1.16463	1	0.959	3.45251e-135	T_early
Gpatch4	1.20239e-138	2.86401	0.227	0.02	6.3289e-134	T_early
Rpl19	1.08706e-137	0.772967	1	0.972	5.72187e-133	T_early
Lef1	8.09986e-136	2.02954	0.945	0.379	4.26344e-131	T_early
Snx9	9.18122e-136	2.99317	0.188	0.014	4.83263e-131	T_early
Als2cl	2.78264e-130	2.66051	0.289	0.033	1.46467e-125	T_early
Rpl18	1.91407e-129	0.816647	1	0.97	1.00749e-124	T_early
Sidt1	3.10075e-128	2.01078	0.818	0.256	1.63211e-123	T_early
Thada	1.42126e-125	2.06079	0.494	0.087	7.48095e-121	T_early
Rpl7	1.97645e-124	0.961563	1	0.945	1.04032e-119	T_early
Rps13	2.08498e-123	0.762391	1	0.967	1.09745e-118	T_early
Rpl37a	2.3289e-123	0.958619	1	0.964	1.22584e-118	T_early
Rpl41	3.00205e-123	0.865725	1	0.968	1.58016e-118	T_early
Sgk3	5.0286e-123	3.32251	0.14	0.009	2.64685e-118	T_early
Itm2a	1.57211e-122	2.60072	0.442	0.076	8.27493e-118	T_early
Fam169b	2.27625e-121	2.22251	0.425	0.069	1.19812e-116	T_early
Rpl6	1.22271e-119	1.02955	1	0.946	6.43585e-115	T_early
Rack1	2.30813e-118	0.923635	1	0.946	1.21491e-113	T_early
Rpl34	2.46277e-118	0.729853	1	0.967	1.2963e-113	T_early
Tpt1	7.24165e-118	0.677098	1	0.972	3.81171e-113	T_early
Rmi2	2.24784e-117	3.83313	0.101	0.005	1.18317e-112	T_early
Bach2	6.52119e-117	2.01413	0.425	0.07	3.43249e-112	T_early
Il7r	3.06094e-116	1.80003	0.851	0.284	1.61116e-111	T_early
Fntb	2.09849e-114	2.80012	0.188	0.016	1.10456e-109	T_early
Clec2i	6.3458e-114	2.11252	0.383	0.06	3.34018e-109	T_early
Pdlim1	8.45245e-114	1.95112	0.662	0.158	4.44903e-109	T_early
Rpl36	1.28102e-112	0.911515	0.997	0.961	6.74277e-108	T_early
Rps11	1.53121e-112	0.876472	1	0.965	8.05966e-108	T_early
Rpl5	1.96624e-111	1.16072	0.997	0.879	1.03495e-106	T_early
N4bp2	5.45105e-111	2.67988	0.205	0.02	2.86922e-106	T_early
Rpl14	1.45456e-110	0.934779	1	0.947	7.65622e-106	T_early
Rps27	1.45743e-110	0.986272	1	0.967	7.67133e-106	T_early
Rpl18a	2.8534e-109	0.659842	1	0.974	1.50192e-104	T_early
Ly6e	8.14694e-109	1.47848	0.994	0.592	4.28822e-104	T_early
Rpl29	7.20796e-107	0.866794	1	0.954	3.79398e-102	T_early
Spint2	1.56466e-104	2.12551	0.383	0.064	8.23577e-100	T_early
Pim2	3.43943e-104	2.15158	0.571	0.136	1.81038e-99	T_early
Rps14	1.95074e-103	0.667998	0.997	0.965	1.02679e-98	T_early
Rpl4	7.05418e-103	0.9676	0.994	0.922	3.71304e-98	T_early
Mif	7.2392e-103	1.7517	0.916	0.41	3.81042e-98	T_early
F2rl1	2.31354e-102	2.5085	0.263	0.034	1.21775e-97	T_early
Ift80	1.9183e-101	3.27576	0.14	0.01	1.00972e-96	T_early
Tmsb10	4.40322e-101	0.656576	1	0.981	2.31768e-96	T_early
5830468F06Rik	7.0355e-100	3.53642	0.114	0.007	3.70321e-95	T_early
Npm1	9.79827e-100	1.09137	0.997	0.861	5.15742e-95	T_early
Rps19-ps6	5.71642e-97	1.94165	0.416	0.077	3.0089e-92	T_early
Usp18	1.15057e-96	2.03101	0.351	0.058	6.05615e-92	T_early
Ltb	8.94089e-96	1.44485	0.987	0.585	4.70613e-91	T_early
Filip1l	3.84451e-93	2.63867	0.201	0.022	2.0236e-88	T_early
Rps15	4.18872e-93	1.08554	1	0.842	2.20478e-88	T_early
Rpl31	1.30184e-92	1.44838	0.945	0.529	6.85237e-88	T_early
Rps25	4.19979e-91	1.22734	0.984	0.733	2.2106e-86	T_early
Impdh2	2.7657e-89	1.77365	0.649	0.188	1.45576e-84	T_early
Rab3ip	5.30962e-89	1.93382	0.399	0.077	2.79477e-84	T_early
Slc11a2	2.80744e-88	2.10892	0.279	0.041	1.47772e-83	T_early
Jun	3.42319e-88	1.49277	0.929	0.431	1.80183e-83	T_early
Naca	1.50902e-86	0.897778	0.997	0.909	7.94286e-82	T_early
Rrp15	3.86658e-86	2.07951	0.279	0.042	2.03521e-81	T_early
Prrt1	6.23697e-86	2.69179	0.143	0.013	3.28289e-81	T_early
Zbtb20	4.43686e-85	1.89872	0.299	0.048	2.33539e-80	T_early
Eomes	1.95235e-84	2.12604	0.373	0.074	1.02764e-79	T_early
Rpl7a	2.12953e-84	0.830214	1	0.933	1.1209e-79	T_early
Gm14303	6.07922e-84	1.7938	0.481	0.11	3.19986e-79	T_early
Ephx1	1.19553e-83	2.91991	0.159	0.016	6.29281e-79	T_early
Ppic	5.79831e-83	3.18611	0.127	0.01	3.052e-78	T_early
Tubb5	2.37664e-81	1.23467	0.968	0.68	1.25097e-76	T_early
Dph5	5.98868e-81	1.69377	0.442	0.096	3.1522e-76	T_early
Ass1	8.61689e-81	2.11721	0.315	0.055	4.53559e-76	T_early
Evl	4.99364e-80	1.44924	0.89	0.409	2.62845e-75	T_early
Rps17	8.32552e-80	1.21015	0.977	0.662	4.38222e-75	T_early
Cd27	3.58165e-79	1.39283	0.851	0.345	1.88524e-74	T_early
1110038B12Rik	1.88586e-77	1.8121	0.347	0.066	9.92642e-73	T_early
Bend4	6.28272e-76	1.96739	0.214	0.029	3.30697e-71	T_early
Rpl36a-ps2	7.98861e-76	2.25394	0.237	0.035	4.20488e-71	T_early
Smco4	3.88123e-75	2.34535	0.198	0.026	2.04292e-70	T_early
Pik3ip1	4.23795e-75	1.62886	0.529	0.14	2.23068e-70	T_early
Ssbp2	2.73676e-74	2.13197	0.244	0.037	1.44052e-69	T_early
Trib2	3.41669e-74	2.42015	0.205	0.028	1.79841e-69	T_early
Ppp1r14b	3.82924e-73	1.72503	0.607	0.183	2.01556e-68	T_early
Gpr183	7.72374e-73	1.39404	0.513	0.133	4.06547e-68	T_early
Tuba1b	2.32022e-72	1.4079	0.818	0.327	1.22127e-67	T_early
mt-Nd2	1.16956e-71	0.748358	1	0.931	6.15611e-67	T_early
Snhg15	1.57585e-71	1.87303	0.282	0.049	8.29464e-67	T_early
Nle1	1.60068e-70	1.92987	0.26	0.043	8.42531e-66	T_early
Cd69	4.55161e-70	1.44048	0.659	0.211	2.39579e-65	T_early
Neurl3	1.25612e-69	1.65277	0.367	0.079	6.6117e-65	T_early
Limd2	6.82364e-69	0.939183	1	0.843	3.59169e-64	T_early
Nedd4l	1.02458e-68	2.46052	0.136	0.014	5.39298e-64	T_early
Rpl22l1	3.2332e-68	0.986099	0.987	0.818	1.70183e-63	T_early
Thra	1.05946e-66	2.4087	0.127	0.013	5.57658e-62	T_early
Dgka	1.67458e-65	1.12544	0.958	0.564	8.81432e-61	T_early
Usp28	2.06301e-65	2.18577	0.195	0.028	1.08589e-60	T_early
Tnfrsf26	4.63369e-65	2.91921	0.104	0.009	2.43899e-60	T_early
Fbl	2.19636e-64	1.35711	0.76	0.291	1.15608e-59	T_early
Rpl38	3.78649e-63	0.855534	0.997	0.909	1.99306e-58	T_early
Trmt1	4.31238e-63	1.45342	0.432	0.108	2.26987e-58	T_early
Ttc28	2.86247e-62	2.72586	0.127	0.013	1.50669e-57	T_early
Mdn1	3.40262e-62	1.55293	0.377	0.088	1.791e-57	T_early
Vars	3.60468e-62	1.37048	0.539	0.157	1.89736e-57	T_early
Hspe1	2.23727e-61	1.15557	0.932	0.575	1.17761e-56	T_early
Cd79b	7.56512e-61	2.2924	0.162	0.021	3.98198e-56	T_early
Isoc1	1.9164e-60	1.95897	0.231	0.04	1.00872e-55	T_early
Smc4	1.30625e-59	1.45281	0.76	0.323	6.87558e-55	T_early
Ttc27	3.86018e-59	1.97918	0.169	0.023	2.03184e-54	T_early
Gm10443	4.59373e-59	1.76625	0.354	0.084	2.41795e-54	T_early
Adk	1.00671e-58	2.17025	0.169	0.024	5.29894e-54	T_early
Mfhas1	1.11663e-58	2.04751	0.188	0.029	5.87748e-54	T_early
Carmil2	1.35181e-58	1.56103	0.325	0.072	7.11541e-54	T_early
Plscr3	2.69221e-58	2.65624	0.104	0.01	1.41707e-53	T_early
Ssh2	9.33497e-58	1.31376	0.555	0.175	4.91356e-53	T_early
Mgst2	1.54051e-57	1.49528	0.445	0.121	8.10862e-53	T_early
Pitpnm2	2.05321e-57	1.92546	0.175	0.026	1.08073e-52	T_early
A930005H10Rik	2.20018e-57	1.46059	0.451	0.124	1.15808e-52	T_early
Tlr1	3.10734e-57	2.6723	0.104	0.01	1.63558e-52	T_early
C1qbp	1.59613e-56	1.33006	0.653	0.227	8.40141e-52	T_early
Ppa1	3.65534e-56	1.88803	0.247	0.047	1.92403e-51	T_early
Uba52	7.67763e-56	0.911756	0.984	0.791	4.0412e-51	T_early
Bzw2	1.09502e-55	1.48286	0.445	0.126	5.76375e-51	T_early
Ipo4	2.58714e-55	2.0056	0.195	0.032	1.36177e-50	T_early
Rapgef6	2.61377e-55	1.09553	0.896	0.482	1.37578e-50	T_early
Tpd52	2.7763e-55	2.56345	0.12	0.013	1.46133e-50	T_early
Hspbp1	6.19332e-55	1.5525	0.338	0.08	3.25992e-50	T_early
Gm43352	6.21043e-55	1.86699	0.227	0.041	3.26892e-50	T_early
Mrpl23-ps1	1.31689e-54	1.77631	0.24	0.046	6.93159e-50	T_early
Gramd4	1.42495e-54	1.35464	0.471	0.137	7.50039e-50	T_early
Gm11707	4.0028e-53	2.92686	0.101	0.01	2.10691e-48	T_early
Gas5	2.93479e-52	1.01264	0.942	0.613	1.54475e-47	T_early
Snhg1	1.38932e-51	1.32694	0.526	0.17	7.31283e-47	T_early
Taf4b	1.90971e-51	1.56068	0.237	0.046	1.0052e-46	T_early
Phpt1	2.51347e-51	1.56865	0.318	0.075	1.32299e-46	T_early
Mrto4	3.79687e-51	1.37985	0.367	0.094	1.99852e-46	T_early
Eef1g	4.36173e-51	0.9477	0.951	0.671	2.29584e-46	T_early
Adgrg5	1.14648e-50	1.287	0.289	0.064	6.03462e-46	T_early
Gstp3	1.43599e-50	1.62847	0.299	0.07	7.55846e-46	T_early
Atn1	1.44408e-50	2.20863	0.133	0.017	7.60106e-46	T_early
Cd72	3.78176e-50	1.53111	0.286	0.065	1.99057e-45	T_early
1500011K16Rik	1.03135e-49	2.00703	0.179	0.03	5.42862e-45	T_early
Fau	1.91583e-49	0.376132	1	0.973	1.00842e-44	T_early
Smad1	2.4322e-49	2.09001	0.146	0.021	1.28021e-44	T_early
mt-Nd1	2.49272e-49	0.615367	1	0.902	1.31207e-44	T_early
Nop16	4.35724e-49	1.54851	0.263	0.057	2.29348e-44	T_early
Chchd10	1.02476e-48	1.94724	0.172	0.028	5.39395e-44	T_early
Pde3b	1.59768e-48	0.963749	0.721	0.274	8.40954e-44	T_early
Ralgps2	4.33256e-48	2.28923	0.127	0.017	2.28049e-43	T_early
Pou6f1	6.36229e-47	1.50955	0.244	0.052	3.34885e-42	T_early
Gpx1	9.65809e-47	1.13894	0.792	0.394	5.08363e-42	T_early
Cyb5a	1.16126e-46	1.15592	0.627	0.23	6.11239e-42	T_early
Skp1a	1.37062e-46	1.03606	0.87	0.455	7.21438e-42	T_early
Rpl23a	3.68946e-46	1.09784	0.851	0.473	1.94198e-41	T_early
Hsp90ab1	8.01227e-46	0.571419	1	0.965	4.21734e-41	T_early
Rgcc	9.24317e-46	1.98619	0.253	0.058	4.86524e-41	T_early
Tfap4	2.32757e-45	1.95764	0.162	0.027	1.22514e-40	T_early
Galk1	4.74438e-45	1.59889	0.227	0.047	2.49725e-40	T_early
Eif4a1	5.23699e-45	0.984334	0.906	0.577	2.75654e-40	T_early
Rps16-ps2	5.48e-45	1.23111	0.506	0.17	2.88445e-40	T_early
Tbxa2r	6.15389e-45	1.39066	0.354	0.097	3.23916e-40	T_early
Arhgap39	7.37658e-45	1.89584	0.146	0.023	3.88274e-40	T_early
Rcsd1	1.02001e-44	1.19335	0.506	0.172	5.36895e-40	T_early
Fam46c	1.13843e-44	1.52947	0.286	0.069	5.99222e-40	T_early
Gm12013	2.04085e-44	1.28249	0.416	0.124	1.07422e-39	T_early
Lsm2	2.80153e-44	1.16798	0.377	0.105	1.47461e-39	T_early
Grk6	4.94217e-44	1.0455	0.782	0.38	2.60136e-39	T_early
Itgb3	5.04662e-44	2.31873	0.14	0.021	2.65634e-39	T_early
Romo1	1.01691e-43	1.06245	0.617	0.229	5.35263e-39	T_early
Slc17a9	1.69278e-43	1.34716	0.354	0.1	8.91013e-39	T_early
Rhob	1.77249e-43	1.42308	0.338	0.094	9.32966e-39	T_early
Gm9794	4.32467e-43	1.23636	0.5	0.17	2.27634e-38	T_early
Pus7	5.78103e-43	2.20049	0.12	0.017	3.0429e-38	T_early
Elovl5	5.82659e-43	1.16177	0.494	0.166	3.06688e-38	T_early
Rcl1	8.62177e-43	1.34944	0.321	0.085	4.53816e-38	T_early
Mrps28	1.55463e-42	1.48457	0.273	0.067	8.18296e-38	T_early
Ets2	1.69698e-42	1.87691	0.175	0.032	8.93224e-38	T_early
Mybbp1a	3.46994e-42	1.0861	0.565	0.208	1.82644e-37	T_early
Fchsd2	4.02568e-42	1.28119	0.331	0.09	2.11895e-37	T_early
Gm4332	8.91296e-42	2.19051	0.133	0.02	4.69143e-37	T_early
Atad3a	3.09648e-41	1.37386	0.247	0.057	1.62987e-36	T_early
AC125206.2	3.36196e-41	1.72654	0.218	0.047	1.7696e-36	T_early
Ikbke	3.53953e-41	1.21439	0.36	0.105	1.86307e-36	T_early
Klra3	6.46625e-41	1.15875	0.299	0.08	3.40358e-36	T_early
Prmt3	7.18608e-41	1.29348	0.331	0.092	3.78247e-36	T_early
Trmt61a	7.57043e-41	1.7457	0.153	0.026	3.98477e-36	T_early
Rpl10a-ps1	1.12322e-40	1.50654	0.273	0.068	5.91217e-36	T_early
Tsr1	1.89253e-40	1.5079	0.26	0.064	9.96151e-36	T_early
Ptma	2.66806e-40	0.585251	0.994	0.928	1.40436e-35	T_early
Tuba4a	2.8226e-40	1.09372	0.568	0.211	1.4857e-35	T_early
Rbm38	3.02138e-40	1.02837	0.776	0.377	1.59034e-35	T_early
Gnl3	4.40652e-40	1.41028	0.26	0.064	2.31942e-35	T_early
Pgs1	4.79731e-40	1.13841	0.393	0.119	2.52511e-35	T_early
Bcl2l11	7.15253e-40	1.32636	0.273	0.069	3.76481e-35	T_early
Rps27rt	1.05773e-39	1.08089	0.62	0.252	5.56747e-35	T_early
Nop58	2.94571e-39	1.08087	0.549	0.211	1.5505e-34	T_early
Ppp1r15a	3.02632e-39	0.816637	0.919	0.582	1.59293e-34	T_early
Mpp1	1.3289e-38	1.37345	0.299	0.081	6.99481e-34	T_early
Gm9493	1.563e-38	1.11963	0.5	0.178	8.22701e-34	T_early
Foxo1	2.01994e-38	0.954263	0.766	0.378	1.06322e-33	T_early
Tec	3.18738e-38	1.30397	0.273	0.071	1.67771e-33	T_early
Nsmce1	3.38757e-38	1.14453	0.409	0.131	1.78308e-33	T_early
Snhg12	4.91223e-38	1.03861	0.461	0.156	2.5856e-33	T_early
Ttyh3	6.05287e-38	1.26301	0.334	0.098	3.18599e-33	T_early
Art2b	7.63872e-38	1.36484	0.286	0.077	4.02071e-33	T_early
Bicdl1	1.6003e-37	1.84793	0.133	0.022	8.42332e-33	T_early
Macrod1	1.82488e-37	1.8412	0.13	0.021	9.60545e-33	T_early
Hspa9	4.79495e-37	0.986718	0.562	0.211	2.52387e-32	T_early
Utp20	5.69888e-37	1.43528	0.208	0.047	2.99966e-32	T_early
Crtam	6.00672e-37	1.25549	0.328	0.096	3.1617e-32	T_early
Fdx1l	6.2946e-37	1.46071	0.227	0.054	3.31323e-32	T_early
Trp53	6.37813e-37	0.997975	0.718	0.332	3.35719e-32	T_early
Dusp16	8.31344e-37	2.01477	0.101	0.014	4.37586e-32	T_early
Bbc3	8.53558e-37	1.24183	0.338	0.102	4.49279e-32	T_early
Tma16	1.05786e-36	1.75943	0.13	0.021	5.56813e-32	T_early
Tsc22d3	2.01721e-36	0.845685	0.896	0.553	1.06178e-31	T_early
Scml4	2.44502e-36	1.03376	0.451	0.158	1.28696e-31	T_early
Gcsh	2.61415e-36	1.86125	0.14	0.025	1.37598e-31	T_early
Gart	3.4219e-36	1.1814	0.318	0.092	1.80115e-31	T_early
Rexo2	2.11703e-35	1.00943	0.64	0.266	1.11432e-30	T_early
Traf4	2.70552e-35	1.2645	0.299	0.085	1.42408e-30	T_early
Mettl9	3.55482e-35	1.21383	0.347	0.107	1.87112e-30	T_early
Hipk2	4.38952e-35	1.84147	0.156	0.031	2.31047e-30	T_early
Rcc2	6.12376e-35	1.04659	0.464	0.167	3.2233e-30	T_early
Dpp4	7.97049e-35	1.06013	0.432	0.151	4.19535e-30	T_early
Pwp2	1.16945e-34	1.47763	0.166	0.034	6.15554e-30	T_early
Nsa2	1.45205e-34	0.667502	0.981	0.732	7.643e-30	T_early
Mrpl23	1.68788e-34	1.71163	0.172	0.036	8.8843e-30	T_early
Lcn4	1.8316e-34	1.28587	0.325	0.101	9.64079e-30	T_early
Trbc2	2.02553e-34	0.976198	0.88	0.525	1.06616e-29	T_early
Zeb1	2.79524e-34	1.04691	0.279	0.077	1.4713e-29	T_early
Wdr46	4.30446e-34	1.28366	0.263	0.072	2.26569e-29	T_early
Lyst	8.19257e-34	0.886359	0.471	0.171	4.31224e-29	T_early
Cbl	8.62633e-34	0.827012	0.607	0.254	4.54055e-29	T_early
Rps10-ps2	1.48861e-33	1.11721	0.458	0.17	7.83544e-29	T_early
Zhx2	2.26892e-33	1.5929	0.13	0.023	1.19427e-28	T_early
Wdr12	2.45898e-33	1.3542	0.221	0.055	1.29431e-28	T_early
Psme1	3.34145e-33	0.639954	0.99	0.765	1.75881e-28	T_early
Rpl39-ps	3.43422e-33	1.18916	0.403	0.142	1.80764e-28	T_early
Shmt2	3.57225e-33	1.21846	0.393	0.135	1.88029e-28	T_early
Gar1	7.38744e-33	1.04535	0.377	0.123	3.88845e-28	T_early
Crim1	9.27038e-33	0.922439	0.321	0.098	4.87956e-28	T_early
Fam3c	1.03828e-32	1.09228	0.354	0.115	5.46509e-28	T_early
Gm13611	2.57403e-32	1.07096	0.269	0.075	1.35487e-27	T_early
Nme2	3.54157e-32	0.851634	0.86	0.534	1.86414e-27	T_early
Bri3bp	7.27551e-32	1.48354	0.205	0.05	3.82954e-27	T_early
Zfp36l1	1.01128e-31	0.813594	0.886	0.551	5.32299e-27	T_early
Snrpf	1.06353e-31	0.822436	0.825	0.444	5.59798e-27	T_early
Alkbh1	1.18163e-31	0.960583	0.416	0.145	6.21963e-27	T_early
Gm7536	1.24967e-31	1.55563	0.211	0.053	6.57774e-27	T_early
Gm6472	1.65452e-31	1.6822	0.149	0.03	8.70871e-27	T_early
Socs1	2.11959e-31	1.03282	0.331	0.105	1.11567e-26	T_early
Gimap6	4.12206e-31	0.589488	0.99	0.83	2.16969e-26	T_early
Gm20186	4.78569e-31	1.18944	0.263	0.076	2.51899e-26	T_early
Epb41l4aos	5.26588e-31	1.00797	0.425	0.154	2.77175e-26	T_early
Mthfd1	5.58641e-31	1.50651	0.149	0.031	2.94046e-26	T_early
Sh2b3	6.84544e-31	1.26903	0.179	0.041	3.60317e-26	T_early
Dkc1	1.54074e-30	1.09994	0.364	0.125	8.10982e-26	T_early
Eml5	1.71996e-30	1.41927	0.169	0.038	9.05321e-26	T_early
Eef1e1	1.9168e-30	0.948603	0.425	0.153	1.00893e-25	T_early
Nme1	2.70147e-30	1.12834	0.416	0.154	1.42194e-25	T_early
Gm20069	3.7751e-30	1.06918	0.295	0.091	1.98706e-25	T_early
Kcnq1ot1	5.71731e-30	0.513381	0.409	0.146	3.00937e-25	T_early
Timm9	6.92215e-30	1.18013	0.234	0.064	3.64354e-25	T_early
Ctss	1.17841e-29	0.849055	0.588	0.255	6.20268e-25	T_early
Ifrd2	2.84269e-29	1.22302	0.162	0.036	1.49628e-24	T_early
Polr2h	3.27633e-29	0.96479	0.308	0.097	1.72453e-24	T_early
Rftn1	3.54325e-29	0.758451	0.39	0.137	1.86502e-24	T_early
Rere	3.92796e-29	0.964533	0.315	0.102	2.06752e-24	T_early
Phb	4.37702e-29	0.90924	0.474	0.185	2.30389e-24	T_early
Rrp9	5.02308e-29	1.06475	0.299	0.095	2.64395e-24	T_early
Ppia	5.49806e-29	0.352177	1	0.965	2.89396e-24	T_early
Gm20400	5.75008e-29	1.84335	0.302	0.105	3.02661e-24	T_early
5830444F18Rik	9.21381e-29	1.2017	0.162	0.037	4.84978e-24	T_early
Midn	9.96435e-29	0.939046	0.451	0.175	5.24483e-24	T_early
Map3k8	1.77179e-28	1.59473	0.263	0.082	9.32597e-24	T_early
Gpr146	1.77342e-28	1.25692	0.214	0.058	9.33455e-24	T_early
Ttc3	2.00017e-28	0.821401	0.393	0.143	1.05281e-23	T_early
Sdr39u1	2.71842e-28	1.27607	0.205	0.054	1.43087e-23	T_early
Pusl1	2.76611e-28	1.81941	0.107	0.019	1.45597e-23	T_early
Hspb11	2.88217e-28	1.51929	0.185	0.046	1.51706e-23	T_early
Lsm7	3.70519e-28	0.859492	0.584	0.251	1.95026e-23	T_early
Stambpl1	3.77946e-28	1.02269	0.318	0.106	1.98936e-23	T_early
Wdr4	4.48974e-28	1.75199	0.12	0.023	2.36322e-23	T_early
Trbc1	5.57741e-28	1.1275	0.422	0.167	2.93572e-23	T_early
Peli1	7.33401e-28	0.793043	0.805	0.486	3.86033e-23	T_early
Klf7	7.52079e-28	0.869138	0.305	0.099	3.95864e-23	T_early
Usp53	1.11189e-27	1.38511	0.13	0.026	5.85254e-23	T_early
Tubb4b	1.24112e-27	0.803767	0.701	0.35	6.53277e-23	T_early
Tox	2.23696e-27	0.914062	0.208	0.056	1.17745e-22	T_early
N6amt1	2.31172e-27	1.21704	0.205	0.055	1.2168e-22	T_early
Smad7	2.9041e-27	0.690397	0.662	0.307	1.5286e-22	T_early
Samd3	3.87286e-27	0.849965	0.377	0.135	2.03852e-22	T_early
Metap1d	6.2614e-27	1.75039	0.11	0.021	3.29575e-22	T_early
Kat2a	6.47677e-27	1.01593	0.302	0.1	3.40911e-22	T_early
Ppan	7.04384e-27	0.894018	0.377	0.136	3.70759e-22	T_early
Ltv1	8.04473e-27	1.09211	0.227	0.065	4.23442e-22	T_early
Timm10	1.03501e-26	1.05307	0.224	0.063	5.44788e-22	T_early
Btbd11	1.31649e-26	1.09178	0.218	0.061	6.92949e-22	T_early
Plcxd2	1.79148e-26	0.791269	0.438	0.172	9.42965e-22	T_early
Cotl1	1.87507e-26	0.726528	0.896	0.564	9.86964e-22	T_early
Sssca1	1.98545e-26	0.970315	0.295	0.097	1.04506e-21	T_early
Nop10	2.17161e-26	0.762421	0.847	0.539	1.14305e-21	T_early
Gm10076	2.22431e-26	0.906152	0.403	0.151	1.17079e-21	T_early
Jakmip1.1	2.75396e-26	0.768139	0.494	0.205	1.44957e-21	T_early
Abce1	2.78826e-26	0.941079	0.383	0.144	1.46763e-21	T_early
Tcf12	3.3286e-26	0.841553	0.393	0.149	1.75204e-21	T_early
Traf1	3.34501e-26	0.763257	0.61	0.276	1.76068e-21	T_early
Mrps5	3.98111e-26	0.930874	0.331	0.116	2.0955e-21	T_early
Cct6a	4.17095e-26	0.750176	0.659	0.31	2.19542e-21	T_early
Eif3i	4.41136e-26	0.733526	0.86	0.541	2.32196e-21	T_early
Rpl37rt	4.74972e-26	1.38612	0.159	0.038	2.50006e-21	T_early
Eef1d	5.19967e-26	0.536351	0.964	0.772	2.7369e-21	T_early
Pprc1	8.72877e-26	1.28295	0.182	0.048	4.59447e-21	T_early
Hsd17b12	8.94189e-26	1.05449	0.24	0.073	4.70665e-21	T_early
Gzmm	2.01179e-25	1.50221	0.279	0.098	1.05893e-20	T_early
Rpl27	2.08841e-25	0.357025	1	0.954	1.09926e-20	T_early
Gm26809	2.71579e-25	1.21185	0.172	0.044	1.42948e-20	T_early
Mrps18b	3.36298e-25	1.1049	0.25	0.078	1.77014e-20	T_early
Gstt2	3.9265e-25	1.18679	0.214	0.062	2.06675e-20	T_early
Il21r	4.50874e-25	0.717797	0.705	0.37	2.37322e-20	T_early
Rhobtb2	9.39362e-25	1.55202	0.133	0.03	4.94442e-20	T_early
Txk	9.43327e-25	0.697014	0.588	0.263	4.9653e-20	T_early
Rasa2	1.14879e-24	0.886944	0.325	0.116	6.04676e-20	T_early
Grwd1	1.39025e-24	1.29937	0.156	0.038	7.31772e-20	T_early
Pus1	1.4948e-24	0.974912	0.286	0.096	7.86801e-20	T_early
Gm26917	1.8987e-24	0.291729	0.844	0.564	9.99397e-20	T_early
Npc2	1.93115e-24	0.654628	0.938	0.739	1.01648e-19	T_early
BC005561	2.57499e-24	1.04429	0.218	0.065	1.35537e-19	T_early
Znrf1	2.62181e-24	0.784844	0.484	0.207	1.38001e-19	T_early
Fam102a	3.72866e-24	0.700382	0.455	0.184	1.96262e-19	T_early
Gm20696	4.18522e-24	1.18145	0.123	0.027	2.20293e-19	T_early
Relb	4.30166e-24	0.794552	0.341	0.126	2.26422e-19	T_early
Ehd1	5.23386e-24	0.917284	0.367	0.141	2.7549e-19	T_early
Tmem9	5.69798e-24	1.61461	0.117	0.025	2.99919e-19	T_early
Supt3	5.82451e-24	1.1588	0.172	0.045	3.06579e-19	T_early
Hexa	6.06906e-24	0.964439	0.244	0.077	3.19451e-19	T_early
Entpd5	6.56262e-24	1.02241	0.214	0.063	3.4543e-19	T_early
Rpgrip1	6.83966e-24	1.66074	0.114	0.024	3.60012e-19	T_early
Hnrnpa1	6.84226e-24	0.722908	0.828	0.501	3.60149e-19	T_early
Tmem243	8.33989e-24	0.8592	0.367	0.14	4.38979e-19	T_early
Hnrnpa0	9.40991e-24	0.709973	0.815	0.459	4.953e-19	T_early
Snhg8	1.57063e-23	0.674154	0.782	0.448	8.26717e-19	T_early
Pop5	1.71472e-23	0.712173	0.5	0.211	9.02559e-19	T_early
Dusp10	2.11462e-23	1.01271	0.269	0.092	1.11305e-18	T_early
Hdac7	2.67746e-23	0.614647	0.682	0.335	1.40931e-18	T_early
Sesn3	2.88947e-23	0.705512	0.409	0.164	1.5209e-18	T_early
Fam234a	3.30277e-23	1.26007	0.166	0.044	1.73844e-18	T_early
Nckap5l	4.9011e-23	1.37741	0.133	0.031	2.57974e-18	T_early
Akr7a5	7.01768e-23	0.944671	0.237	0.075	3.69383e-18	T_early
Hdac4	7.82973e-23	1.04076	0.201	0.06	4.12126e-18	T_early
Wdr75	8.09486e-23	0.928805	0.273	0.094	4.26081e-18	T_early
Pa2g4	8.24806e-23	0.8009	0.692	0.368	4.34145e-18	T_early
Slc12a7	9.60767e-23	0.832065	0.334	0.126	5.05709e-18	T_early
Bbs9	1.07004e-22	1.28866	0.159	0.042	5.63228e-18	T_early
Btf3l4	1.13141e-22	0.977458	0.208	0.062	5.95527e-18	T_early
Stt3b	1.26948e-22	0.7827	0.425	0.172	6.68201e-18	T_early
Tmem256	1.47903e-22	0.920429	0.308	0.112	7.78503e-18	T_early
Ntpcr	1.56723e-22	1.11201	0.198	0.059	8.24926e-18	T_early
1190007I07Rik	1.58584e-22	0.923923	0.234	0.074	8.34722e-18	T_early
Phgdh	1.70647e-22	0.948572	0.377	0.149	8.98218e-18	T_early
Etv3	1.88615e-22	1.23964	0.146	0.037	9.92794e-18	T_early
Klhdc2	3.01511e-22	1.0639	0.338	0.13	1.58704e-17	T_early
Vegfb	3.1214e-22	1.10926	0.156	0.041	1.64298e-17	T_early
Gm6136	3.68678e-22	0.865357	0.292	0.103	1.94057e-17	T_early
Cox7a2l	4.02357e-22	0.653626	0.896	0.621	2.11785e-17	T_early
Sdad1	4.83653e-22	0.6724	0.328	0.121	2.54576e-17	T_early
Gm37248	5.01183e-22	0.968555	0.156	0.041	2.63803e-17	T_early
Reck	5.39233e-22	1.15394	0.182	0.053	2.83831e-17	T_early
Ppm1h	5.45266e-22	0.693033	0.575	0.286	2.87006e-17	T_early
Nolc1	6.9173e-22	0.669082	0.497	0.222	3.64099e-17	T_early
Gm6934	7.39989e-22	1.39478	0.123	0.029	3.89501e-17	T_early
Gm45837	8.103e-22	0.798638	0.386	0.158	4.26509e-17	T_early
Bdh1	8.59457e-22	1.05005	0.24	0.08	4.52384e-17	T_early
Gbe1	8.74753e-22	1.12985	0.146	0.037	4.60435e-17	T_early
Aig1	1.00342e-21	1.28182	0.133	0.032	5.28158e-17	T_early
Ccdc91	1.12615e-21	1.49915	0.101	0.021	5.92759e-17	T_early
Plcb2	1.19526e-21	0.704502	0.334	0.126	6.29138e-17	T_early
Trim12a	1.48399e-21	0.719146	0.481	0.213	7.81114e-17	T_early
Utp14a	1.84436e-21	0.793271	0.354	0.14	9.70795e-17	T_early
Tbl1x	2.01635e-21	0.870086	0.331	0.13	1.06133e-16	T_early
Mtap	2.13968e-21	0.723239	0.357	0.139	1.12624e-16	T_early
Fos	2.27329e-21	0.577196	0.64	0.342	1.19657e-16	T_early
Add1	2.31384e-21	0.648721	0.656	0.33	1.21792e-16	T_early
Lmnb2	2.3745e-21	1.69891	0.11	0.024	1.24984e-16	T_early
Pde4d	2.88556e-21	1.08049	0.192	0.058	1.51884e-16	T_early
Pip4k2a	3.7463e-21	0.643636	0.523	0.236	1.9719e-16	T_early
Arl5c	4.1317e-21	0.722729	0.568	0.281	2.17476e-16	T_early
Ddb2	6.06084e-21	0.790858	0.276	0.098	3.19018e-16	T_early
Nsun2	7.32038e-21	0.725975	0.458	0.203	3.85315e-16	T_early
Qtrt1	7.63273e-21	0.851258	0.224	0.073	4.01756e-16	T_early
Fastkd2	1.10697e-20	1.32613	0.117	0.027	5.82665e-16	T_early
Camk2d	1.11355e-20	0.619007	0.506	0.231	5.86129e-16	T_early
Ears2	1.90759e-20	1.41002	0.114	0.026	1.00408e-15	T_early
Cct3	2.73954e-20	0.73222	0.597	0.291	1.44198e-15	T_early
Smarcb1	2.74014e-20	0.666605	0.373	0.15	1.4423e-15	T_early
Ruvbl2	3.89602e-20	0.837629	0.302	0.115	2.05071e-15	T_early
Gm19261	4.159e-20	1.56481	0.13	0.033	2.18913e-15	T_early
Ifi27l2a	4.20127e-20	0.234723	0.646	0.318	2.21138e-15	T_early
Surf2	4.24216e-20	0.693167	0.334	0.13	2.2329e-15	T_early
Prmt7	5.25393e-20	0.842773	0.201	0.064	2.76546e-15	T_early
Snhg17	5.42489e-20	0.907453	0.214	0.07	2.85545e-15	T_early
Mecr	7.47753e-20	1.23327	0.12	0.029	3.93587e-15	T_early
Nhp2	7.49495e-20	0.705012	0.571	0.283	3.94504e-15	T_early
Abcg1	9.07129e-20	0.724199	0.305	0.117	4.77477e-15	T_early
Agfg1	9.16781e-20	0.567343	0.597	0.291	4.82557e-15	T_early
Plekhg2	9.39971e-20	0.862803	0.237	0.082	4.94763e-15	T_early
Ppp1r13b	9.50469e-20	0.534041	0.312	0.117	5.00289e-15	T_early
2010107E04Rik	9.81111e-20	0.54383	0.873	0.582	5.16418e-15	T_early
Heatr1	1.11814e-19	0.867592	0.247	0.087	5.88543e-15	T_early
Fam46a	1.14689e-19	0.672258	0.425	0.188	6.03675e-15	T_early
Pno1	1.18425e-19	0.633106	0.295	0.11	6.23343e-15	T_early
Oxct1	1.27089e-19	0.583235	0.429	0.183	6.68946e-15	T_early
Cep68	1.27723e-19	0.880386	0.218	0.073	6.72284e-15	T_early
Cmss1	1.36225e-19	1.20122	0.114	0.027	7.17035e-15	T_early
Relt	1.59203e-19	0.889461	0.192	0.06	8.37978e-15	T_early
Msra	1.64417e-19	1.07639	0.175	0.053	8.65427e-15	T_early
Snhg6	1.85367e-19	0.899791	0.24	0.084	9.75697e-15	T_early
Dzip1	1.87774e-19	1.24703	0.123	0.031	9.88365e-15	T_early
Idh2	1.92978e-19	0.868637	0.247	0.087	1.01576e-14	T_early
Ctdsp2	2.23319e-19	0.827004	0.231	0.079	1.17546e-14	T_early
Pinx1	2.50496e-19	1.00312	0.198	0.064	1.31851e-14	T_early
Eefsec	2.59789e-19	0.59488	0.351	0.141	1.36743e-14	T_early
Trbv16	2.66881e-19	2.1479	0.104	0.024	1.40476e-14	T_early
2510002D24Rik	2.71158e-19	0.701683	0.312	0.121	1.42727e-14	T_early
Atp5g2	2.77784e-19	0.433878	0.968	0.808	1.46214e-14	T_early
Cnp	2.82371e-19	0.595157	0.799	0.46	1.48629e-14	T_early
Smg1	2.82913e-19	0.479749	0.708	0.394	1.48914e-14	T_early
Foxp1	3.38213e-19	0.582358	0.818	0.534	1.78022e-14	T_early
Rhoh	3.45611e-19	0.620712	0.724	0.404	1.81916e-14	T_early
Srsf6	3.71818e-19	0.558796	0.708	0.38	1.9571e-14	T_early
Mesd	3.89451e-19	0.831901	0.244	0.086	2.04991e-14	T_early
AC153862.2	4.32239e-19	1.31929	0.104	0.024	2.27513e-14	T_early
Sema4b	4.36601e-19	0.956749	0.185	0.058	2.29809e-14	T_early
AC110377.1	4.4573e-19	1.2511	0.127	0.032	2.34615e-14	T_early
Coq2	6.54431e-19	0.664556	0.286	0.108	3.44466e-14	T_early
Eif3e	6.85158e-19	0.536765	0.903	0.624	3.6064e-14	T_early
Hirip3	8.09994e-19	0.991244	0.13	0.034	4.26348e-14	T_early
Psmg1	9.17192e-19	1.05136	0.185	0.059	4.82773e-14	T_early
Sptbn1	1.11938e-18	0.554375	0.685	0.358	5.89199e-14	T_early
Mrps34	1.19459e-18	0.71038	0.429	0.191	6.28786e-14	T_early
Gm5617	1.42774e-18	1.27437	0.14	0.039	7.51503e-14	T_early
Skil	1.52248e-18	0.809496	0.227	0.079	8.01375e-14	T_early
Nutf2	1.53003e-18	0.647749	0.474	0.215	8.05347e-14	T_early
Ndufc1	1.59486e-18	0.636506	0.49	0.231	8.39471e-14	T_early
Usp10	1.64919e-18	0.593828	0.292	0.111	8.68069e-14	T_early
Mrpl11	1.71579e-18	0.848179	0.286	0.111	9.03125e-14	T_early
Polr1a	1.77734e-18	0.908733	0.192	0.062	9.35523e-14	T_early
Prps1	1.98783e-18	0.640899	0.347	0.141	1.04631e-13	T_early
Rrs1	2.11207e-18	0.560995	0.338	0.135	1.11171e-13	T_early
Rfc1	2.60111e-18	0.543824	0.377	0.158	1.36912e-13	T_early
Cd53	2.65142e-18	0.50848	0.88	0.589	1.3956e-13	T_early
Zbtb4	2.69417e-18	0.744091	0.25	0.091	1.4181e-13	T_early
Asf1a	3.27806e-18	0.731939	0.305	0.121	1.72544e-13	T_early
Cd320	3.79547e-18	1.494	0.101	0.023	1.99779e-13	T_early
Adsl	3.95198e-18	0.60382	0.432	0.189	2.08017e-13	T_early
Ccdc102a	4.23315e-18	1.16288	0.143	0.041	2.22816e-13	T_early
Syne2	4.65394e-18	0.81358	0.175	0.055	2.44965e-13	T_early
Ftsj3	4.80471e-18	0.631303	0.364	0.155	2.52901e-13	T_early
C230096K16Rik	4.9325e-18	0.707806	0.201	0.068	2.59627e-13	T_early
Ice2	5.26088e-18	1.40766	0.117	0.03	2.76912e-13	T_early
Nbn	5.58502e-18	1.20281	0.11	0.027	2.93973e-13	T_early
Etfbkmt	5.58583e-18	1.10216	0.159	0.048	2.94016e-13	T_early
Ggact	7.12206e-18	1.26291	0.12	0.031	3.74877e-13	T_early
Wdr89	7.64892e-18	0.825653	0.201	0.067	4.02608e-13	T_early
Bola2	8.05268e-18	0.579625	0.731	0.42	4.23861e-13	T_early
Cxcr4	8.34735e-18	0.838973	0.175	0.055	4.39371e-13	T_early
Bst2	8.36428e-18	0.549266	0.627	0.323	4.40262e-13	T_early
Mgrn1	8.85825e-18	1.14615	0.133	0.037	4.66263e-13	T_early
Ikbkb	8.95469e-18	0.531941	0.581	0.284	4.71339e-13	T_early
Smim8	9.20414e-18	0.662244	0.273	0.103	4.84469e-13	T_early
Trbv12-2	9.32973e-18	1.6374	0.175	0.058	4.9108e-13	T_early
Fam162a	9.44082e-18	0.677411	0.393	0.172	4.96927e-13	T_early
Nfkbiz	1.03414e-17	0.462024	0.484	0.228	5.4433e-13	T_early
Atp5g1	1.05501e-17	0.57913	0.792	0.485	5.55314e-13	T_early
Lsm4	1.12341e-17	0.498935	0.799	0.47	5.91315e-13	T_early
Ssr4	1.17764e-17	0.568963	0.779	0.472	6.19864e-13	T_early
mt-Cytb	1.21936e-17	0.161836	1	0.996	6.41824e-13	T_early
Ddx27	1.43923e-17	0.418388	0.545	0.25	7.57553e-13	T_early
Pes1	1.45358e-17	0.547106	0.435	0.192	7.65105e-13	T_early
Rassf2	1.6131e-17	0.677885	0.325	0.134	8.4907e-13	T_early
Phf11c	1.61438e-17	1.00489	0.169	0.053	8.49746e-13	T_early
Cacybp	1.64973e-17	0.571986	0.581	0.286	8.68351e-13	T_early
Pcbp1	1.94546e-17	0.48564	0.922	0.686	1.02401e-12	T_early
Hipk1	2.013e-17	0.538439	0.477	0.229	1.05956e-12	T_early
Ppie	2.1478e-17	0.694605	0.305	0.123	1.13051e-12	T_early
Rnf144a	2.1771e-17	1.09618	0.136	0.039	1.14594e-12	T_early
Ccdc58	2.23491e-17	0.827908	0.159	0.048	1.17637e-12	T_early
Thoc6	2.27359e-17	0.855578	0.175	0.056	1.19673e-12	T_early
Tanc1	2.82449e-17	0.849752	0.169	0.054	1.4867e-12	T_early
Wdr43	2.83965e-17	0.625096	0.435	0.204	1.49468e-12	T_early
Lap3	3.00564e-17	1.11288	0.156	0.048	1.58205e-12	T_early
Dnajb2	3.06193e-17	1.04436	0.12	0.032	1.61168e-12	T_early
Naa10	3.65499e-17	0.594868	0.594	0.305	1.92384e-12	T_early
Pcgf5	4.17824e-17	0.81984	0.211	0.074	2.19926e-12	T_early
Ftl1	4.27393e-17	0.392645	0.99	0.907	2.24963e-12	T_early
P2ry10	4.54848e-17	0.860662	0.175	0.057	2.39414e-12	T_early
Psmg4	5.5626e-17	0.725322	0.37	0.161	2.92793e-12	T_early
Rpl24	6.41219e-17	0.739968	0.601	0.346	3.37512e-12	T_early
Rrp12	7.37508e-17	1.38551	0.114	0.03	3.88194e-12	T_early
Srpk1	8.10573e-17	0.54534	0.708	0.402	4.26653e-12	T_early
Chrac1	8.20668e-17	0.502653	0.448	0.202	4.31967e-12	T_early
Dis3	8.35298e-17	0.822458	0.172	0.056	4.39668e-12	T_early
Pum3	9.14927e-17	0.531175	0.354	0.15	4.81581e-12	T_early
Ubald2	1.02428e-16	0.542695	0.74	0.414	5.3914e-12	T_early
Ung	1.03284e-16	1.41784	0.107	0.027	5.43647e-12	T_early
Eif5a	1.09585e-16	0.535152	0.961	0.794	5.76811e-12	T_early
Hvcn1	1.13281e-16	0.682035	0.416	0.191	5.96268e-12	T_early
2810004N23Rik	1.28542e-16	0.610001	0.299	0.121	6.76596e-12	T_early
Crlf3	1.36049e-16	0.657622	0.766	0.483	7.1611e-12	T_early
Hspd1	1.36642e-16	0.54525	0.682	0.378	7.19227e-12	T_early
Polr3e	1.39927e-16	0.899541	0.182	0.061	7.36518e-12	T_early
Cux1	1.55911e-16	0.608539	0.292	0.119	8.20653e-12	T_early
Rtp4	1.61231e-16	0.852503	0.172	0.057	8.48658e-12	T_early
Slc35f2	1.72151e-16	1.13937	0.107	0.027	9.06134e-12	T_early
Ppat	1.99809e-16	0.684582	0.231	0.085	1.05172e-11	T_early
Hs6st1	2.00922e-16	1.16343	0.13	0.037	1.05757e-11	T_early
Ascc1	2.1451e-16	0.712134	0.256	0.099	1.1291e-11	T_early
Dyrk2	2.17523e-16	0.49746	0.399	0.178	1.14495e-11	T_early
Zfp593	2.2127e-16	0.657652	0.351	0.154	1.16468e-11	T_early
Usp24	2.29185e-16	0.383355	0.494	0.232	1.20634e-11	T_early
Sil1	2.4512e-16	1.20404	0.101	0.025	1.29021e-11	T_early
Nars2	2.48806e-16	0.83255	0.156	0.049	1.30962e-11	T_early
Cpm	2.50957e-16	1.16107	0.146	0.045	1.32094e-11	T_early
Snrpg	2.75549e-16	0.512623	0.883	0.578	1.45038e-11	T_early
Gtpbp4	2.8021e-16	0.47437	0.526	0.254	1.47491e-11	T_early
Abcb9	3.34164e-16	0.762742	0.224	0.084	1.75891e-11	T_early
Raver1	3.36695e-16	0.891991	0.123	0.034	1.77223e-11	T_early
Gm9385	3.42502e-16	0.53241	0.782	0.468	1.80279e-11	T_early
Rars	3.67527e-16	0.593179	0.299	0.121	1.93452e-11	T_early
Acyp1	3.76218e-16	0.67131	0.328	0.14	1.98026e-11	T_early
Vps37b	4.16589e-16	0.453062	0.692	0.385	2.19276e-11	T_early
Rps26-ps1	5.44818e-16	1.40242	0.117	0.032	2.8677e-11	T_early
Satb1	7.28228e-16	0.486945	0.896	0.624	3.8331e-11	T_early
Naa25	8.11369e-16	0.753588	0.182	0.062	4.27072e-11	T_early
Ctage5	8.8009e-16	0.525986	0.607	0.317	4.63244e-11	T_early
Saraf	1.13988e-15	0.481344	0.945	0.697	5.99985e-11	T_early
Agpat5	1.22636e-15	0.597192	0.25	0.097	6.45509e-11	T_early
Ranbp10	1.29213e-15	0.58723	0.312	0.132	6.80128e-11	T_early
Dusp1	1.40524e-15	0.478477	0.666	0.393	7.39661e-11	T_early
Osgep	1.40983e-15	0.588249	0.331	0.142	7.42076e-11	T_early
Eif3h	1.48275e-15	0.393184	0.968	0.823	7.80461e-11	T_early
Ndufaf4	1.51259e-15	0.690592	0.256	0.102	7.96165e-11	T_early
Apol7e	1.87054e-15	0.420172	0.377	0.167	9.84579e-11	T_early
Tomm40	1.9262e-15	0.56606	0.373	0.167	1.01388e-10	T_early
Rpf2	1.93605e-15	0.828409	0.185	0.065	1.01906e-10	T_early
Ndufa5	2.00426e-15	0.487363	0.542	0.267	1.05496e-10	T_early
Gnl1	2.06684e-15	0.753384	0.269	0.112	1.0879e-10	T_early
Erdr1	2.09141e-15	0.738129	0.175	0.06	1.10084e-10	T_early
Noa1	2.45512e-15	0.918706	0.201	0.074	1.29228e-10	T_early
Park7	2.46379e-15	0.490032	0.886	0.576	1.29684e-10	T_early
Cd3eap	2.67492e-15	1.08704	0.133	0.04	1.40797e-10	T_early
Kif1b	2.71219e-15	0.720402	0.292	0.125	1.42759e-10	T_early
Atic	2.73421e-15	0.499499	0.568	0.286	1.43918e-10	T_early
Rnaset2a	2.73672e-15	0.59957	0.552	0.287	1.4405e-10	T_early
mt-Nd5	2.80927e-15	0.262289	0.964	0.821	1.47869e-10	T_early
Gm44686	3.11264e-15	1.00596	0.146	0.046	1.63837e-10	T_early
Peg13	3.24639e-15	0.848776	0.172	0.059	1.70877e-10	T_early
Psme2	4.14373e-15	0.433545	0.951	0.717	2.1811e-10	T_early
Dnajc7	4.51142e-15	0.528536	0.666	0.383	2.37463e-10	T_early
Slc43a2	5.00734e-15	0.770518	0.221	0.085	2.63566e-10	T_early
Cxcr3	5.33624e-15	0.283786	0.513	0.264	2.80879e-10	T_early
Sigmar1	5.39695e-15	0.664528	0.201	0.073	2.84074e-10	T_early
Ece2	5.60929e-15	1.15229	0.11	0.03	2.95251e-10	T_early
Cct4	5.70164e-15	0.483955	0.766	0.462	3.00112e-10	T_early
Nop2	5.80055e-15	0.604491	0.221	0.083	3.05318e-10	T_early
Lbh	5.82924e-15	0.45722	0.597	0.313	3.06828e-10	T_early
Hdac2	5.9227e-15	0.490013	0.396	0.181	3.11747e-10	T_early
Tbcel	7.06445e-15	0.878917	0.211	0.081	3.71845e-10	T_early
Dirc2	7.43247e-15	0.694589	0.234	0.092	3.91216e-10	T_early
Exosc2	7.46048e-15	0.662523	0.169	0.057	3.9269e-10	T_early
Exosc5	7.48662e-15	0.498007	0.422	0.198	3.94066e-10	T_early
Cct5	8.24485e-15	0.502582	0.789	0.492	4.33976e-10	T_early
Mrpl12	9.95021e-15	0.4289	0.523	0.253	5.23739e-10	T_early
Enc1	1.0758e-14	1.10706	0.14	0.045	5.66258e-10	T_early
Fam78a	1.12026e-14	0.537757	0.597	0.326	5.8966e-10	T_early
Larp1	1.12676e-14	0.408616	0.545	0.279	5.93083e-10	T_early
Usf2	1.2087e-14	0.547069	0.545	0.287	6.36209e-10	T_early
Pdcd4	1.31277e-14	0.415363	0.87	0.593	6.90992e-10	T_early
Dohh.1	1.41749e-14	0.5843	0.321	0.14	7.46112e-10	T_early
Prss12	1.46068e-14	1.13918	0.104	0.028	7.68844e-10	T_early
Ly75	1.66649e-14	0.569585	0.286	0.122	8.77174e-10	T_early
Fubp1	1.67121e-14	0.372449	0.617	0.327	8.79658e-10	T_early
Ktn1	1.70394e-14	0.493184	0.256	0.104	8.96888e-10	T_early
Cox10	1.88201e-14	0.684122	0.179	0.063	9.90616e-10	T_early
Eif2a	2.12809e-14	0.568561	0.325	0.143	1.12014e-09	T_early
2610002M06Rik	2.32666e-14	0.808075	0.195	0.073	1.22466e-09	T_early
Spin1	2.69135e-14	0.557362	0.256	0.105	1.41662e-09	T_early
Fam136a	2.8909e-14	0.718257	0.185	0.067	1.52165e-09	T_early
Mri1	3.11642e-14	0.504488	0.451	0.224	1.64036e-09	T_early
Dbp	3.35964e-14	1.06052	0.117	0.034	1.76838e-09	T_early
Pebp1	3.39865e-14	0.498727	0.643	0.361	1.78891e-09	T_early
Gm7730	3.45676e-14	0.73447	0.224	0.088	1.8195e-09	T_early
Fdx1	3.99363e-14	0.600139	0.201	0.075	2.10209e-09	T_early
Rasgrp1	4.25545e-14	0.44175	0.662	0.366	2.2399e-09	T_early
Vwa8	4.41906e-14	0.705983	0.14	0.045	2.32602e-09	T_early
Mitd1	4.44625e-14	0.575062	0.282	0.122	2.34033e-09	T_early
Nlk	4.47527e-14	0.582513	0.325	0.149	2.3556e-09	T_early
Rsl24d1	4.51645e-14	0.632426	0.286	0.123	2.37728e-09	T_early
Ldha	4.88105e-14	0.418793	0.942	0.752	2.56919e-09	T_early
Fam208b	4.94475e-14	0.39234	0.409	0.195	2.60272e-09	T_early
Anp32a	4.98791e-14	0.384496	0.938	0.72	2.62544e-09	T_early
Xrcc5	5.17316e-14	1.01208	0.146	0.049	2.72294e-09	T_early
Banf1	5.34526e-14	0.475241	0.786	0.49	2.81353e-09	T_early
mt-Nd4l	5.45234e-14	0.254184	0.396	0.185	2.86989e-09	T_early
Strbp	5.72817e-14	1.01998	0.114	0.033	3.01508e-09	T_early
Sdhaf1	5.81737e-14	0.773253	0.244	0.101	3.06203e-09	T_early
Trbv15	6.36412e-14	1.82734	0.101	0.029	3.34982e-09	T_early
Nufip1	6.4459e-14	0.487024	0.302	0.131	3.39286e-09	T_early
Hsdl1	6.56418e-14	0.775116	0.237	0.097	3.45512e-09	T_early
Zfpm1	6.57215e-14	0.727916	0.179	0.065	3.45932e-09	T_early
Them6	6.79697e-14	0.654064	0.347	0.164	3.57765e-09	T_early
Srebf2	6.98733e-14	0.500121	0.292	0.126	3.67785e-09	T_early
Nat10	7.37888e-14	0.729307	0.175	0.064	3.88395e-09	T_early
Cops3	7.65874e-14	0.479925	0.305	0.132	4.03126e-09	T_early
Rpl36-ps2	7.94317e-14	1.04763	0.114	0.033	4.18097e-09	T_early
Pex3	7.95228e-14	0.673409	0.159	0.055	4.18576e-09	T_early
Suclg1	8.15117e-14	0.521896	0.429	0.208	4.29045e-09	T_early
Spata6	8.20927e-14	0.534527	0.266	0.112	4.32103e-09	T_early
Hsd17b11	8.50619e-14	0.788422	0.182	0.067	4.47732e-09	T_early
Zfp281	8.62541e-14	0.605226	0.231	0.093	4.54007e-09	T_early
Acaa2	9.2993e-14	0.550638	0.409	0.199	4.89478e-09	T_early
Klhl6	1.02034e-13	0.389849	0.711	0.419	5.37068e-09	T_early
Zdhhc8	1.03345e-13	0.54161	0.263	0.11	5.43966e-09	T_early
BC029722	1.03798e-13	0.506408	0.286	0.122	5.46351e-09	T_early
Zfp422	1.07061e-13	0.820396	0.156	0.054	5.63525e-09	T_early
Parp8	1.1911e-13	0.651697	0.198	0.076	6.2695e-09	T_early
Eprs	1.20495e-13	0.435984	0.481	0.241	6.34238e-09	T_early
Mfsd6	1.25514e-13	0.629416	0.312	0.141	6.60655e-09	T_early
Gm28935	1.35299e-13	0.787955	0.188	0.071	7.12159e-09	T_early
Trmt112	1.36952e-13	0.3889	0.906	0.669	7.20861e-09	T_early
Trim44	1.45307e-13	0.442771	0.295	0.129	7.64836e-09	T_early
Bcs1l	1.45619e-13	1.02194	0.12	0.037	7.6648e-09	T_early
Plekha1	1.47555e-13	0.870652	0.149	0.051	7.7667e-09	T_early
Dgkd	1.49939e-13	0.44743	0.445	0.223	7.8922e-09	T_early
Tomm70a	1.54779e-13	0.476907	0.481	0.244	8.14695e-09	T_early
Tmem261	1.56944e-13	0.549031	0.393	0.192	8.2609e-09	T_early
Actn2	1.62525e-13	1.20286	0.143	0.049	8.55466e-09	T_early
Xpc	1.63437e-13	0.678529	0.208	0.082	8.60266e-09	T_early
Gm11808	1.74179e-13	0.743294	0.211	0.084	9.16808e-09	T_early
Ctsz	1.83051e-13	0.585225	0.244	0.101	9.63509e-09	T_early
Fasn	1.84275e-13	0.628661	0.218	0.087	9.6995e-09	T_early
Cnpy2	1.86109e-13	0.757779	0.221	0.089	9.79606e-09	T_early
1600002K03Rik	1.92447e-13	0.786086	0.218	0.088	1.01296e-08	T_early
Trappc12	2.01159e-13	0.467333	0.39	0.186	1.05882e-08	T_early
Neu1	2.02753e-13	0.616419	0.273	0.119	1.06721e-08	T_early
Sesn1	2.099e-13	0.449475	0.289	0.126	1.10483e-08	T_early
Ddx56	2.10935e-13	0.486196	0.253	0.105	1.11028e-08	T_early
Noc2l	2.13877e-13	0.528004	0.481	0.25	1.12576e-08	T_early
Tmem42	2.36773e-13	1.03243	0.127	0.04	1.24628e-08	T_early
Mturn	2.38551e-13	0.685873	0.166	0.059	1.25564e-08	T_early
Tet3	2.8859e-13	0.405692	0.334	0.154	1.51902e-08	T_early
Ndufa4	2.96978e-13	0.399394	0.916	0.646	1.56317e-08	T_early
Fam26f	3.20156e-13	0.592288	0.224	0.09	1.68518e-08	T_early
G0s2	3.32086e-13	0.907477	0.107	0.032	1.74797e-08	T_early
Gngt2	3.45418e-13	0.738836	0.179	0.066	1.81814e-08	T_early
Nit2	3.46672e-13	0.909915	0.12	0.037	1.82474e-08	T_early
Wwp1	4.13847e-13	0.641737	0.273	0.121	2.17833e-08	T_early
1810032O08Rik	4.23873e-13	0.857351	0.143	0.049	2.2311e-08	T_early
Aff4	4.31602e-13	0.356811	0.461	0.236	2.27178e-08	T_early
Thumpd2	4.38437e-13	1.00299	0.117	0.036	2.30776e-08	T_early
AU022252	4.61513e-13	0.777358	0.14	0.047	2.42922e-08	T_early
Focad	4.68373e-13	0.853198	0.101	0.029	2.46533e-08	T_early
Gm12254	4.91005e-13	0.698481	0.26	0.113	2.58445e-08	T_early
Rabggtb	5.14608e-13	0.47239	0.279	0.121	2.70869e-08	T_early
Chchd1	5.21478e-13	0.425594	0.455	0.223	2.74485e-08	T_early
Acp6	5.57206e-13	0.809293	0.162	0.059	2.93291e-08	T_early
Prmt1	6.70591e-13	0.466723	0.578	0.314	3.52972e-08	T_early
Gid4	7.38008e-13	0.698791	0.221	0.091	3.88458e-08	T_early
Rcor1	7.49201e-13	0.452638	0.334	0.158	3.94349e-08	T_early
H2-Ke6	8.31499e-13	0.585362	0.383	0.189	4.37668e-08	T_early
Churc1	9.69058e-13	0.416083	0.571	0.304	5.10073e-08	T_early
Uchl3	1.03703e-12	0.491654	0.344	0.161	5.4585e-08	T_early
Gm16124	1.04491e-12	0.965197	0.11	0.034	5.50001e-08	T_early
Aatf	1.09585e-12	0.488807	0.295	0.133	5.76809e-08	T_early
Wdr83os	1.22595e-12	0.456082	0.604	0.334	6.45291e-08	T_early
Taf1d	1.27444e-12	0.461204	0.409	0.201	6.70815e-08	T_early
Map4k4	1.2992e-12	0.367023	0.688	0.4	6.83849e-08	T_early
Akap9	1.36356e-12	0.229596	0.549	0.286	7.17721e-08	T_early
Lyar	1.39432e-12	0.457319	0.276	0.122	7.33913e-08	T_early
Nob1	1.39611e-12	0.479205	0.37	0.18	7.34856e-08	T_early
Heatr3	1.41687e-12	0.685507	0.162	0.06	7.45783e-08	T_early
Ppdpf	1.47012e-12	0.482544	0.649	0.365	7.73811e-08	T_early
Mrps33	1.49698e-12	0.436092	0.529	0.277	7.87949e-08	T_early
Asap1	1.52248e-12	0.427398	0.351	0.168	8.01372e-08	T_early
Pdcd2	1.56743e-12	0.44642	0.49	0.245	8.25033e-08	T_early
Eif3m	1.67202e-12	0.435536	0.825	0.534	8.80083e-08	T_early
Atxn10	1.73661e-12	0.423511	0.477	0.247	9.14084e-08	T_early
Rae1	1.74089e-12	0.348071	0.481	0.24	9.16335e-08	T_early
Sipa1l1	1.7657e-12	0.396395	0.227	0.095	9.29395e-08	T_early
Zfp652	1.77283e-12	0.332601	0.305	0.14	9.33147e-08	T_early
Gm8186	1.78569e-12	0.509418	0.49	0.261	9.39913e-08	T_early
Fndc3a	1.80107e-12	0.361559	0.299	0.136	9.48011e-08	T_early
Zfas1	1.80225e-12	0.512727	0.36	0.174	9.48632e-08	T_early
Pdha1	1.92018e-12	0.495216	0.432	0.222	1.01071e-07	T_early
Gapdh	1.94362e-12	0.389903	0.955	0.767	1.02305e-07	T_early
Bhlhb9	2.13061e-12	0.780295	0.104	0.031	1.12147e-07	T_early
Rad23b	2.13255e-12	0.365434	0.562	0.297	1.12249e-07	T_early
Thumpd1	2.14785e-12	0.411382	0.373	0.181	1.13054e-07	T_early
Slc35g1	2.15017e-12	0.68551	0.14	0.048	1.13176e-07	T_early
Dars	2.18199e-12	0.416091	0.51	0.27	1.14851e-07	T_early
Pabpc4	2.21093e-12	0.777054	0.182	0.071	1.16374e-07	T_early
Endog	2.22633e-12	0.663719	0.179	0.068	1.17185e-07	T_early
Rai1	2.28194e-12	0.449909	0.227	0.095	1.20112e-07	T_early
Mthfd1l	2.33888e-12	0.445833	0.247	0.106	1.23109e-07	T_early
Cd3d	2.3658e-12	0.279305	1	0.911	1.24526e-07	T_early
Rrp1b	2.52538e-12	0.526249	0.253	0.112	1.32926e-07	T_early
4632427E13Rik	2.67056e-12	0.405908	0.227	0.095	1.40568e-07	T_early
2310039H08Rik	2.75556e-12	0.495235	0.253	0.11	1.45042e-07	T_early
Gpr18	2.99695e-12	0.392801	0.393	0.192	1.57748e-07	T_early
Ddx18	3.13591e-12	0.30531	0.477	0.242	1.65062e-07	T_early
Rnf130	3.15105e-12	0.737782	0.185	0.073	1.65859e-07	T_early
Cebpb	3.53918e-12	0.66094	0.373	0.192	1.86288e-07	T_early
Slfn1	3.74504e-12	0.36386	0.64	0.36	1.97124e-07	T_early
Eif3k	3.88006e-12	0.355366	0.935	0.728	2.04231e-07	T_early
Lman2l	3.88051e-12	0.747414	0.166	0.063	2.04254e-07	T_early
mt-Nd6	4.0127e-12	0.25669	0.474	0.243	2.11212e-07	T_early
Hsdl2	4.23323e-12	0.61332	0.224	0.095	2.2282e-07	T_early
Farsb	4.51872e-12	0.41295	0.321	0.149	2.37847e-07	T_early
Acbd6	4.6378e-12	0.418189	0.445	0.224	2.44115e-07	T_early
Siah1a	4.93624e-12	0.348087	0.266	0.116	2.59824e-07	T_early
Zmiz2	5.01783e-12	0.537219	0.221	0.093	2.64119e-07	T_early
Mrpl35	5.03042e-12	0.407561	0.286	0.128	2.64781e-07	T_early
Rab4a	5.16399e-12	0.912705	0.101	0.03	2.71812e-07	T_early
Echdc1	5.20787e-12	0.914249	0.117	0.038	2.74122e-07	T_early
Srrt	5.38846e-12	0.29978	0.429	0.215	2.83627e-07	T_early
Hivep1	5.88499e-12	0.818889	0.146	0.053	3.09763e-07	T_early
Dopey1	6.16445e-12	0.606308	0.175	0.068	3.24472e-07	T_early
Luc7l	6.39326e-12	0.342304	0.334	0.158	3.36516e-07	T_early
Lysmd2	6.56153e-12	0.751872	0.14	0.049	3.45373e-07	T_early
Carm1	6.72442e-12	0.607526	0.159	0.059	3.53946e-07	T_early
Rpl13a	6.72687e-12	0.391135	0.906	0.661	3.54075e-07	T_early
Gm5914	7.07615e-12	1.00034	0.11	0.035	3.7246e-07	T_early
Mpp6	7.14022e-12	0.888753	0.123	0.042	3.75833e-07	T_early
Polr3d	7.24968e-12	0.639978	0.169	0.065	3.81594e-07	T_early
Iars	7.70302e-12	0.770913	0.218	0.094	4.05456e-07	T_early
Tbrg4	7.86966e-12	0.49582	0.26	0.116	4.14227e-07	T_early
Rnaset2b	7.95241e-12	0.451683	0.526	0.286	4.18583e-07	T_early
Ddx39b	8.09592e-12	0.395841	0.86	0.585	4.26137e-07	T_early
Haus1	8.53461e-12	1.0177	0.104	0.032	4.49228e-07	T_early
Tbl3	8.57327e-12	0.480962	0.211	0.087	4.51262e-07	T_early
Mettl22	8.78845e-12	0.935714	0.101	0.031	4.62589e-07	T_early
Zfp827	8.80731e-12	0.748931	0.107	0.034	4.63582e-07	T_early
Huwe1	9.37386e-12	0.222987	0.549	0.292	4.93403e-07	T_early
Ado	9.5265e-12	0.578914	0.182	0.071	5.01437e-07	T_early
Nifk	9.86007e-12	0.506149	0.237	0.102	5.18995e-07	T_early
C920009B18Rik	1.03064e-11	0.79287	0.114	0.037	5.4249e-07	T_early
Rwdd2b	1.07256e-11	0.974154	0.104	0.032	5.64553e-07	T_early
Prps2	1.12819e-11	0.489561	0.341	0.166	5.93834e-07	T_early
Gm11478	1.14477e-11	0.549472	0.334	0.165	6.02561e-07	T_early
Tars2	1.27136e-11	0.573706	0.175	0.069	6.69191e-07	T_early
Zkscan3	1.28898e-11	0.38321	0.331	0.159	6.78468e-07	T_early
Nip7	1.31267e-11	0.500322	0.328	0.157	6.90937e-07	T_early
Ncoa3	1.4022e-11	0.513853	0.331	0.161	7.38059e-07	T_early
Dph6	1.44515e-11	0.927411	0.127	0.044	7.60668e-07	T_early
Ago2	1.46288e-11	0.407125	0.51	0.28	7.70002e-07	T_early
Per1	1.52109e-11	0.413973	0.328	0.16	8.00643e-07	T_early
Faah	1.55412e-11	0.386393	0.26	0.116	8.18029e-07	T_early
Ivd	1.57981e-11	0.437673	0.237	0.103	8.31551e-07	T_early
Rnf213	1.6687e-11	0.366298	0.393	0.202	8.7834e-07	T_early
Neurl4	1.70379e-11	0.52891	0.156	0.058	8.96807e-07	T_early
Ppargc1b	1.70987e-11	0.705466	0.127	0.044	9.00006e-07	T_early
Rab6b	1.7331e-11	0.580589	0.188	0.077	9.12232e-07	T_early
Mtx1	1.82182e-11	0.574157	0.234	0.102	9.58935e-07	T_early
Ipo5	1.96749e-11	0.397371	0.321	0.154	1.03561e-06	T_early
Tspyl2	2.09586e-11	0.427284	0.188	0.076	1.10318e-06	T_early
6820431F20Rik	2.13515e-11	0.248127	0.302	0.142	1.12386e-06	T_early
Cd7	2.17664e-11	0.366866	0.701	0.426	1.14569e-06	T_early
Slc25a5	2.20347e-11	0.386896	0.922	0.693	1.15982e-06	T_early
Hmga1	2.26886e-11	0.412468	0.422	0.217	1.19424e-06	T_early
Ddx58	2.28409e-11	0.348802	0.455	0.237	1.20225e-06	T_early
Twistnb	2.29671e-11	0.269038	0.468	0.243	1.2089e-06	T_early
Prdx6	2.4112e-11	0.4604	0.695	0.421	1.26916e-06	T_early
Pex7	2.48437e-11	0.570419	0.208	0.088	1.30767e-06	T_early
Rmnd1	2.67235e-11	0.633279	0.172	0.068	1.40662e-06	T_early
Klhdc1	2.7832e-11	0.694689	0.169	0.066	1.46497e-06	T_early
Znhit6	2.80954e-11	0.507926	0.214	0.091	1.47883e-06	T_early
Slc7a1	2.81999e-11	0.516699	0.133	0.047	1.48433e-06	T_early
Phf6	2.95098e-11	0.526512	0.286	0.135	1.55328e-06	T_early
Ice1	3.09158e-11	0.401413	0.347	0.172	1.62728e-06	T_early
Cluh	3.10071e-11	0.642328	0.146	0.055	1.63209e-06	T_early
Casc4	3.20268e-11	0.609953	0.136	0.049	1.68576e-06	T_early
Abhd11	3.25022e-11	0.477086	0.292	0.138	1.71079e-06	T_early
Map3k5	3.31598e-11	0.744358	0.12	0.041	1.7454e-06	T_early
Sdhc	3.42384e-11	0.404781	0.341	0.164	1.80217e-06	T_early
Bclaf1	3.45588e-11	0.290476	0.688	0.401	1.81904e-06	T_early
Chchd7	3.49774e-11	0.367136	0.338	0.161	1.84107e-06	T_early
Adi1	3.55098e-11	0.493307	0.237	0.105	1.86909e-06	T_early
Eef2kmt	3.74426e-11	0.345301	0.244	0.107	1.97083e-06	T_early
Epb41l2	3.79533e-11	0.65837	0.13	0.046	1.99771e-06	T_early
Atxn2	4.07834e-11	0.49075	0.188	0.077	2.14668e-06	T_early
Kdm6b	4.15453e-11	0.549051	0.237	0.108	2.18678e-06	T_early
Adpgk	4.27841e-11	0.438862	0.208	0.088	2.25198e-06	T_early
BC024978	4.32167e-11	0.893001	0.101	0.032	2.27476e-06	T_early
Cytip	4.34383e-11	0.322826	0.929	0.734	2.28642e-06	T_early
Rpl36al	4.5456e-11	0.375104	0.867	0.615	2.39262e-06	T_early
Nol6	4.60986e-11	0.613393	0.201	0.085	2.42644e-06	T_early
Cdk5rap1	4.63094e-11	0.616767	0.211	0.092	2.43754e-06	T_early
Abhd8	4.77823e-11	0.456041	0.494	0.265	2.51507e-06	T_early
Xylt2	4.94538e-11	0.681512	0.149	0.056	2.60305e-06	T_early
Cmah	5.01034e-11	0.321602	0.753	0.485	2.63724e-06	T_early
Vars2	5.25284e-11	0.667671	0.114	0.038	2.76488e-06	T_early
Rpl14-ps1	5.33062e-11	0.853462	0.143	0.054	2.80582e-06	T_early
Krcc1	5.42537e-11	0.38768	0.5	0.269	2.8557e-06	T_early
Ehd3	5.46831e-11	0.371048	0.545	0.297	2.8783e-06	T_early
Ccdc86	5.68452e-11	0.478393	0.208	0.089	2.99211e-06	T_early
Yeats4	5.75429e-11	0.371775	0.386	0.196	3.02883e-06	T_early
Atp8a1	5.80779e-11	0.372556	0.182	0.073	3.05699e-06	T_early
Tigd2	6.10488e-11	0.325165	0.461	0.24	3.21336e-06	T_early
Ubap2	6.2559e-11	0.493309	0.24	0.108	3.29286e-06	T_early
Ccdc28a	6.47137e-11	0.854724	0.114	0.039	3.40627e-06	T_early
Fmnl3	6.55227e-11	0.749175	0.104	0.034	3.44885e-06	T_early
Rp9	7.149e-11	0.322722	0.724	0.424	3.76295e-06	T_early
Isyna1	7.75092e-11	0.498425	0.367	0.19	4.07977e-06	T_early
Cstf2t	7.91713e-11	0.559682	0.211	0.091	4.16726e-06	T_early
Tbc1d1	8.01774e-11	0.334876	0.49	0.263	4.22022e-06	T_early
Hmbs	8.09191e-11	0.742683	0.146	0.056	4.25926e-06	T_early
Zfp386	8.40715e-11	0.387131	0.334	0.165	4.42519e-06	T_early
Las1l	9.141e-11	0.308765	0.331	0.159	4.81146e-06	T_early
Kras	1.04969e-10	0.382348	0.61	0.361	5.52512e-06	T_early
Pde2a	1.06859e-10	0.479783	0.214	0.093	5.62463e-06	T_early
Fkbp2	1.10105e-10	0.547921	0.205	0.088	5.79549e-06	T_early
Mrpl27	1.11768e-10	0.566141	0.237	0.107	5.88301e-06	T_early
Kdsr	1.13265e-10	0.37292	0.198	0.083	5.96183e-06	T_early
Ric8b	1.17404e-10	0.545992	0.224	0.1	6.1797e-06	T_early
Tgtp2	1.20469e-10	0.539566	0.328	0.168	6.34101e-06	T_early
Tspan3	1.27337e-10	0.787853	0.123	0.044	6.70251e-06	T_early
Ddx21	1.2849e-10	0.328958	0.61	0.353	6.76318e-06	T_early
Rnf138	1.30964e-10	0.423104	0.718	0.462	6.8934e-06	T_early
Ranbp1	1.32515e-10	0.409752	0.636	0.375	6.97506e-06	T_early
Hacd3	1.38338e-10	0.381113	0.224	0.1	7.28155e-06	T_early
2410002F23Rik	1.47323e-10	0.302169	0.292	0.138	7.75447e-06	T_early
Zfp280d	1.54588e-10	0.271916	0.247	0.112	8.1369e-06	T_early
1810022K09Rik	1.59544e-10	0.381966	0.396	0.204	8.39775e-06	T_early
Acsf2	1.61109e-10	0.805847	0.133	0.049	8.48013e-06	T_early
Gm3244	1.73466e-10	0.873603	0.101	0.033	9.13057e-06	T_early
Bcl9l	1.73733e-10	0.351928	0.49	0.271	9.14461e-06	T_early
Pam16	1.74847e-10	0.443881	0.347	0.177	9.20324e-06	T_early
Gsto1	1.76536e-10	0.837303	0.12	0.043	9.29212e-06	T_early
Btbd6	1.82164e-10	0.560253	0.169	0.068	9.5884e-06	T_early
Gpd1l	1.85048e-10	0.659695	0.198	0.086	9.74017e-06	T_early
Ube2d2a	1.97651e-10	0.402491	0.864	0.587	1.04036e-05	T_early
Tapt1	2.01782e-10	0.428907	0.269	0.128	1.0621e-05	T_early
Fam173b	2.03912e-10	0.579377	0.198	0.085	1.07331e-05	T_early
Sgms1	2.20547e-10	0.91982	0.11	0.038	1.16087e-05	T_early
Mrpl30	2.23539e-10	0.457475	0.692	0.427	1.17662e-05	T_early
Erh	2.27349e-10	0.59177	0.325	0.165	1.19668e-05	T_early
Drg1	2.29343e-10	0.366642	0.432	0.225	1.20717e-05	T_early
Lancl1	2.34348e-10	0.259781	0.266	0.123	1.23352e-05	T_early
Exosc1	2.34712e-10	0.465041	0.341	0.171	1.23543e-05	T_early
1810026B05Rik	2.57574e-10	0.272533	0.847	0.581	1.35577e-05	T_early
Chd3	2.7734e-10	0.233944	0.912	0.662	1.45981e-05	T_early
Atp5b	2.786e-10	0.310258	0.964	0.813	1.46644e-05	T_early
Wdr6	2.92071e-10	0.476626	0.166	0.067	1.53734e-05	T_early
Srfbp1	2.94145e-10	0.598124	0.179	0.075	1.54826e-05	T_early
Jmy	2.96065e-10	0.341829	0.234	0.107	1.55837e-05	T_early
Psat1	3.01391e-10	0.793687	0.149	0.059	1.5864e-05	T_early
Rreb1	3.13367e-10	0.416732	0.166	0.067	1.64944e-05	T_early
Atp5g3	3.14722e-10	0.337371	0.971	0.787	1.65657e-05	T_early
Rcbtb1	3.15087e-10	0.355824	0.328	0.165	1.65849e-05	T_early
Mrpl2	3.22272e-10	0.468572	0.263	0.124	1.69631e-05	T_early
Llph	3.32592e-10	0.416735	0.357	0.184	1.75063e-05	T_early
Igtp	3.34893e-10	0.419732	0.334	0.171	1.76274e-05	T_early
Ldlrap1	3.36092e-10	0.393491	0.266	0.126	1.76905e-05	T_early
Washc4	3.4017e-10	0.336929	0.282	0.137	1.79052e-05	T_early
Tfam	3.58727e-10	0.374454	0.334	0.166	1.8882e-05	T_early
Mycbp2	3.70496e-10	0.284617	0.75	0.473	1.95014e-05	T_early
Dnaja3	3.80895e-10	0.56975	0.198	0.087	2.00488e-05	T_early
Smyd3	3.90829e-10	0.384475	0.269	0.128	2.05717e-05	T_early
Gm28901	3.91012e-10	0.587342	0.182	0.077	2.05813e-05	T_early
Mrps18a	4.17493e-10	0.336701	0.354	0.179	2.19752e-05	T_early
Ppcdc	4.17723e-10	0.504145	0.237	0.11	2.19872e-05	T_early
E030030I06Rik	4.26738e-10	0.734291	0.133	0.05	2.24618e-05	T_early
Immp1l	4.46592e-10	0.37865	0.354	0.178	2.35068e-05	T_early
Gbp9	4.55073e-10	0.42053	0.263	0.126	2.39532e-05	T_early
Dimt1	4.84874e-10	0.498493	0.182	0.077	2.55218e-05	T_early
Ndufa12	4.92939e-10	0.349506	0.403	0.209	2.59463e-05	T_early
Akt1s1	4.97061e-10	0.57572	0.136	0.052	2.61633e-05	T_early
Eif2b3	5.02478e-10	0.589512	0.153	0.061	2.64484e-05	T_early
CT010467.1	5.31823e-10	0.243938	0.218	0.098	2.7993e-05	T_early
Eif4b	5.37395e-10	0.336055	0.789	0.538	2.82863e-05	T_early
2610035D17Rik	5.56521e-10	0.518588	0.159	0.065	2.9293e-05	T_early
G3bp1	5.60924e-10	0.415596	0.724	0.446	2.95248e-05	T_early
Mtg1	5.66769e-10	0.730115	0.133	0.051	2.98324e-05	T_early
Eif4a2	5.97223e-10	0.300036	0.841	0.598	3.14354e-05	T_early
Lsm6	5.98593e-10	0.346405	0.536	0.292	3.15076e-05	T_early
Utp4	6.01418e-10	0.488276	0.221	0.1	3.16563e-05	T_early
Paip2b	6.05039e-10	0.619832	0.117	0.042	3.18468e-05	T_early
Gnl2	6.0993e-10	0.371915	0.308	0.154	3.21043e-05	T_early
Pmm1	6.14056e-10	0.64629	0.136	0.052	3.23215e-05	T_early
Nsun5	6.19091e-10	0.50694	0.153	0.061	3.25865e-05	T_early
Tcf20	6.29406e-10	0.263923	0.312	0.154	3.31294e-05	T_early
Ndufaf8	6.34077e-10	0.365038	0.396	0.208	3.33753e-05	T_early
Shisa5	6.41445e-10	0.214856	0.997	0.932	3.37631e-05	T_early
Pde4b	6.51563e-10	0.435613	0.532	0.314	3.42957e-05	T_early
Mrpl17	6.51697e-10	0.433499	0.321	0.162	3.43027e-05	T_early
Washc3	6.71528e-10	0.370402	0.36	0.184	3.53465e-05	T_early
Nefh	6.74002e-10	0.918216	0.123	0.046	3.54768e-05	T_early
Med9	6.77919e-10	0.664987	0.13	0.049	3.56829e-05	T_early
Emc10	7.0614e-10	0.341916	0.646	0.39	3.71684e-05	T_early
Mrps27	7.21162e-10	0.90872	0.101	0.034	3.79591e-05	T_early
Ndufb2	7.4137e-10	0.384965	0.497	0.275	3.90227e-05	T_early
2210016L21Rik	7.81731e-10	0.260984	0.325	0.159	4.11472e-05	T_early
Polr3h	8.10509e-10	0.796518	0.101	0.034	4.2662e-05	T_early
Pla2g12a	8.47697e-10	0.908902	0.101	0.034	4.46194e-05	T_early
Smarca2	8.48208e-10	0.261305	0.477	0.265	4.46463e-05	T_early
Msl3	8.77278e-10	0.477859	0.221	0.101	4.61764e-05	T_early
Lipa	9.97613e-10	0.361969	0.312	0.155	5.25104e-05	T_early
Arhgap15	1.0186e-09	0.28812	0.795	0.522	5.36152e-05	T_early
Yif1b	1.02671e-09	0.427897	0.214	0.097	5.40417e-05	T_early
Fcf1	1.05504e-09	0.208043	0.409	0.206	5.55331e-05	T_early
Mapk8	1.05599e-09	0.63486	0.11	0.039	5.55829e-05	T_early
Birc3	1.05721e-09	0.307137	0.263	0.125	5.56472e-05	T_early
Thyn1	1.10641e-09	0.431751	0.175	0.074	5.82372e-05	T_early
Cnot6l	1.17023e-09	0.297843	0.604	0.357	6.1596e-05	T_early
Pitrm1	1.17537e-09	0.394104	0.198	0.087	6.18668e-05	T_early
Cdk10	1.18786e-09	0.574897	0.13	0.049	6.25244e-05	T_early
Gaa	1.19347e-09	0.770734	0.153	0.063	6.28195e-05	T_early
Noc4l	1.23248e-09	0.424062	0.25	0.119	6.48728e-05	T_early
Tbca	1.24803e-09	0.35726	0.773	0.485	6.56916e-05	T_early
Adh5	1.25942e-09	0.355625	0.552	0.316	6.62908e-05	T_early
Ndufab1	1.27455e-09	0.352443	0.39	0.203	6.7087e-05	T_early
Cand1	1.29799e-09	0.37499	0.299	0.148	6.83212e-05	T_early
Znrf3	1.31165e-09	0.493851	0.166	0.07	6.90398e-05	T_early
Casd1	1.34041e-09	0.736949	0.143	0.057	7.05539e-05	T_early
Odc1	1.38172e-09	0.232797	0.344	0.176	7.27282e-05	T_early
Vps13c	1.43419e-09	0.292853	0.26	0.126	7.549e-05	T_early
1500011B03Rik	1.43921e-09	0.521756	0.195	0.086	7.57541e-05	T_early
Emc9	1.56141e-09	0.683952	0.156	0.065	8.21865e-05	T_early
Zfp217	1.57678e-09	0.458341	0.205	0.093	8.29953e-05	T_early
Ibtk	1.6157e-09	0.373102	0.201	0.09	8.50441e-05	T_early
1110004E09Rik	1.66808e-09	0.541462	0.182	0.079	8.78009e-05	T_early
Eif1a	1.67147e-09	0.397144	0.282	0.14	8.79796e-05	T_early
Itfg2	1.67505e-09	0.710219	0.149	0.061	8.81679e-05	T_early
Lsm14b	1.70533e-09	0.393424	0.305	0.153	8.97616e-05	T_early
Lrrc58	1.79326e-09	0.329772	0.214	0.098	9.43899e-05	T_early
Tarbp2	1.81488e-09	0.449448	0.218	0.1	9.55281e-05	T_early
Smim4	1.85144e-09	0.381766	0.37	0.195	9.74523e-05	T_early
Senp3	1.88321e-09	0.287714	0.315	0.157	9.91247e-05	T_early
Sod2	1.95478e-09	0.281896	0.422	0.222	0.000102892	T_early
Mrps10	1.98196e-09	0.511678	0.169	0.072	0.000104322	T_early
Anapc15	2.01725e-09	0.690837	0.11	0.04	0.00010618	T_early
Crtc3	2.03592e-09	0.249873	0.377	0.198	0.000107163	T_early
Prkd3	2.11979e-09	0.314324	0.244	0.115	0.000111577	T_early
BC003965	2.27918e-09	0.175444	0.406	0.209	0.000119967	T_early
Pdrg1	2.36561e-09	0.317137	0.425	0.23	0.000124516	T_early
Usp7	2.44681e-09	0.227718	0.305	0.153	0.00012879	T_early
Rab11fip2	2.48543e-09	0.447547	0.188	0.084	0.000130823	T_early
Chmp2b	2.52439e-09	0.373747	0.214	0.098	0.000132874	T_early
Ccdc117	2.52668e-09	0.308683	0.315	0.16	0.000132995	T_early
Tufm	2.60147e-09	0.341218	0.386	0.203	0.000136931	T_early
Poldip2	2.61652e-09	0.443616	0.188	0.083	0.000137723	T_early
Mrpl28	2.72001e-09	0.275325	0.276	0.134	0.000143171	T_early
Rbbp5	2.92633e-09	0.261556	0.234	0.109	0.000154031	T_early
Ndufb4	3.02618e-09	0.670576	0.133	0.052	0.000159286	T_early
Agk	3.05122e-09	0.620614	0.133	0.052	0.000160604	T_early
Trbv13-1	3.11996e-09	2.13815	0.114	0.045	0.000164222	T_early
Mrpl45	3.24229e-09	0.549932	0.172	0.075	0.000170661	T_early
Herc3	3.26213e-09	0.327899	0.221	0.103	0.000171706	T_early
Gstcd	3.3001e-09	0.563754	0.123	0.047	0.000173704	T_early
Msh6	3.39771e-09	0.411903	0.162	0.069	0.000178842	T_early
Mnat1	3.40369e-09	0.683511	0.107	0.039	0.000179157	T_early
Yars2	3.44024e-09	0.532908	0.182	0.08	0.000181081	T_early
Wdr26	3.46717e-09	0.236011	0.409	0.219	0.000182498	T_early
Pkmyt1	3.68611e-09	0.655711	0.14	0.057	0.000194022	T_early
Rlim	3.69503e-09	0.255151	0.468	0.262	0.000194492	T_early
Ablim1	3.76387e-09	0.264501	0.932	0.751	0.000198115	T_early
Ahcy	3.78869e-09	0.725075	0.136	0.054	0.000199422	T_early
Dnmt3a	3.83158e-09	0.295793	0.208	0.095	0.000201679	T_early
Sars2	3.88128e-09	0.55638	0.14	0.056	0.000204295	T_early
Eif2s3x	3.90619e-09	0.265224	0.451	0.245	0.000205606	T_early
Prpf19	3.94482e-09	0.33079	0.487	0.272	0.000207639	T_early
Itgb3bp	4.02022e-09	0.595703	0.117	0.044	0.000211608	T_early
Mettl16	4.11376e-09	0.424445	0.227	0.108	0.000216532	T_early
Psmd3	4.16791e-09	0.280298	0.477	0.258	0.000219382	T_early
Snrpd3	4.22619e-09	0.31848	0.834	0.574	0.00022245	T_early
Fam189b	4.24471e-09	0.355137	0.756	0.499	0.000223425	T_early
Tcp11l2	4.25231e-09	0.414374	0.536	0.317	0.000223825	T_early
Ube2r2	4.32712e-09	0.334073	0.481	0.268	0.000227762	T_early
Mettl2	4.38017e-09	0.798604	0.101	0.036	0.000230554	T_early
Iscu	4.51685e-09	0.335126	0.477	0.263	0.000237749	T_early
Mgat4a	4.68421e-09	0.429272	0.127	0.049	0.000246558	T_early
Eif3b	5.07721e-09	0.287578	0.51	0.287	0.000267244	T_early
Selenoh	5.10484e-09	0.321214	0.519	0.289	0.000268698	T_early
Cerk	5.11991e-09	0.291858	0.192	0.086	0.000269491	T_early
Smad5	5.16001e-09	0.802399	0.133	0.054	0.000271603	T_early
CT009546.3	5.26542e-09	0.440028	0.234	0.112	0.000277151	T_early
Ccdc191	5.42351e-09	0.698204	0.101	0.036	0.000285472	T_early
Pgam1	5.43558e-09	0.481017	0.256	0.128	0.000286107	T_early
Prdx3	5.52578e-09	0.357345	0.503	0.287	0.000290855	T_early
Rabl6	5.73873e-09	0.196459	0.321	0.164	0.000302064	T_early
Sf3a1	5.8731e-09	0.292832	0.406	0.218	0.000309136	T_early
Dtymk	5.90037e-09	0.340873	0.292	0.149	0.000310572	T_early
Sfxn1	5.95845e-09	0.329908	0.276	0.139	0.000313629	T_early
Suclg2	6.14418e-09	0.315342	0.25	0.121	0.000323405	T_early
Ctnnbl1	6.18765e-09	0.419552	0.282	0.143	0.000325693	T_early
Nop56	6.32332e-09	0.280064	0.468	0.26	0.000332834	T_early
Vamp1	6.38035e-09	0.877412	0.104	0.038	0.000335836	T_early
Lrpprc	6.45822e-09	0.385975	0.227	0.108	0.000339935	T_early
Fuz	6.52178e-09	0.574167	0.146	0.061	0.00034328	T_early
Slc25a36	6.91037e-09	0.263559	0.179	0.079	0.000363734	T_early
B230307C23Rik	7.3802e-09	0.417682	0.192	0.087	0.000388464	T_early
Utp18	7.3879e-09	0.244464	0.344	0.179	0.00038887	T_early
Gemin5	7.41509e-09	0.392252	0.192	0.087	0.0003903	T_early
Trim12c	7.50782e-09	0.222617	0.425	0.232	0.000395182	T_early
Etnk1	7.50978e-09	0.219248	0.435	0.241	0.000395285	T_early
Prmt5	7.606e-09	0.393273	0.256	0.127	0.00040035	T_early
Cc2d1b	7.71978e-09	0.303143	0.279	0.141	0.000406338	T_early
Mbtps1	7.81146e-09	0.284791	0.282	0.143	0.000411164	T_early
Msi2	8.04238e-09	0.335321	0.253	0.125	0.000423319	T_early
Mrpl19	8.06676e-09	0.387914	0.244	0.119	0.000424602	T_early
Telo2	8.09849e-09	0.667191	0.11	0.041	0.000426272	T_early
Rif1	8.24217e-09	0.161007	0.341	0.179	0.000433835	T_early
Plac8	8.26851e-09	0.246519	0.62	0.386	0.000435221	T_early
Man1a	8.33023e-09	0.350048	0.396	0.221	0.00043847	T_early
Ipo7	8.349e-09	0.20836	0.39	0.207	0.000439458	T_early
Gm37758	8.49915e-09	0.412807	0.234	0.114	0.000447361	T_early
Aimp2	8.53475e-09	0.45004	0.172	0.076	0.000449235	T_early
Emg1	8.56152e-09	0.306328	0.844	0.583	0.000450644	T_early
Ccnh	8.62273e-09	0.30453	0.256	0.126	0.000453866	T_early
Timm21	8.71962e-09	0.617735	0.133	0.054	0.000458966	T_early
Chd6	8.80622e-09	0.290317	0.24	0.117	0.000463524	T_early
Parn	9.03612e-09	0.389092	0.205	0.095	0.000475625	T_early
Scaper	9.14093e-09	0.600098	0.166	0.073	0.000481142	T_early
Pym1	9.22866e-09	0.249186	0.24	0.114	0.00048576	T_early
Nucks1	9.61191e-09	0.213335	0.623	0.366	0.000505933	T_early
Sphk2	1.00781e-08	0.390909	0.205	0.095	0.000530469	T_early
Tfdp1	1.05688e-08	0.467706	0.192	0.087	0.000556298	T_early
Slc26a11	1.06153e-08	0.477725	0.149	0.063	0.000558749	T_early
0610037L13Rik	1.06614e-08	0.217901	0.253	0.124	0.000561176	T_early
Atp5e	1.09379e-08	0.232301	0.984	0.895	0.000575725	T_early
Wdr73	1.09551e-08	0.789006	0.101	0.037	0.000576635	T_early
Ankrd49	1.11245e-08	0.476837	0.153	0.065	0.000585549	T_early
Ppp1r16b	1.12201e-08	0.300323	0.214	0.102	0.000590583	T_early
Hmgxb3	1.2572e-08	0.41216	0.188	0.086	0.000661739	T_early
Dtd1	1.29463e-08	0.38823	0.26	0.13	0.00068144	T_early
Abcc5	1.31385e-08	0.28181	0.169	0.074	0.00069156	T_early
Tatdn1	1.32991e-08	0.529869	0.114	0.043	0.00070001	T_early
Gm15427	1.36113e-08	0.553862	0.185	0.085	0.000716445	T_early
Cenpj	1.38673e-08	0.539358	0.136	0.056	0.000729921	T_early
Bcl2l12	1.41869e-08	0.493547	0.172	0.077	0.00074674	T_early
Tapbpl	1.45937e-08	0.284889	0.477	0.271	0.000768151	T_early
Acat1	1.50513e-08	0.217419	0.393	0.209	0.000792239	T_early
Kat6b	1.51201e-08	0.346878	0.172	0.077	0.000795863	T_early
Mrpl3	1.53458e-08	0.214052	0.25	0.122	0.000807742	T_early
Ccdc125	1.53572e-08	0.448584	0.13	0.052	0.00080834	T_early
Ccdc107	1.55056e-08	0.252478	0.299	0.152	0.000816155	T_early
Hddc2	1.56765e-08	0.570582	0.169	0.076	0.00082515	T_early
Bpnt1	1.62073e-08	0.649705	0.11	0.042	0.000853089	T_early
Inf2	1.63055e-08	0.606071	0.117	0.045	0.000858257	T_early
Ngly1	1.65895e-08	0.185922	0.435	0.236	0.000873205	T_early
Eif2s2	1.71832e-08	0.297511	0.669	0.413	0.000904455	T_early
Poli	1.87569e-08	0.318583	0.162	0.071	0.000987287	T_early
Gtf2h4	1.90218e-08	0.649243	0.114	0.044	0.00100123	T_early
Tmem80	1.90371e-08	0.636614	0.149	0.065	0.00100204	T_early
Gcn1l1	1.94421e-08	0.180969	0.295	0.152	0.00102335	T_early
Noc3l	1.97035e-08	0.437278	0.136	0.056	0.00103711	T_early
Yeats2	1.97145e-08	0.373448	0.179	0.081	0.00103769	T_early
Zmynd11	1.97562e-08	0.247921	0.539	0.314	0.00103989	T_early
Itga6	1.98933e-08	0.545247	0.172	0.078	0.0010471	T_early
Psmb6	1.99141e-08	0.302162	0.692	0.409	0.0010482	T_early
Ube2d-ps	2.00667e-08	0.623963	0.107	0.04	0.00105623	T_early
Wdr36	2.10763e-08	0.296077	0.286	0.146	0.00110937	T_early
Snrpa	2.15606e-08	0.339013	0.383	0.211	0.00113486	T_early
Narfl	2.23567e-08	0.398611	0.172	0.077	0.00117677	T_early
Sirt6	2.36403e-08	0.539832	0.146	0.062	0.00124433	T_early
Pigp	2.42521e-08	0.331056	0.295	0.155	0.00127654	T_early
Pglyrp2	2.43302e-08	0.297695	0.464	0.269	0.00128064	T_early
Aimp1	2.47632e-08	0.316367	0.503	0.291	0.00130343	T_early
Smim12	2.48098e-08	0.241268	0.312	0.159	0.00130589	T_early
Abtb2	2.51167e-08	0.173235	0.286	0.146	0.00132204	T_early
Uck2	2.53847e-08	0.244796	0.308	0.162	0.00133615	T_early
Ube2q2	2.59594e-08	0.344941	0.224	0.109	0.0013664	T_early
Mrpl37	2.80191e-08	0.19482	0.247	0.121	0.00147482	T_early
Ppih	2.85403e-08	0.316549	0.205	0.097	0.00150225	T_early
Tnpo2	2.87011e-08	0.542665	0.104	0.039	0.00151071	T_early
Ripk3	2.90012e-08	0.375856	0.198	0.093	0.0015265	T_early
Utp15	2.95354e-08	0.390847	0.175	0.08	0.00155463	T_early
Mrpl55	3.02399e-08	0.280158	0.237	0.116	0.00159171	T_early
Pwp1	3.03605e-08	0.444906	0.175	0.08	0.00159806	T_early
Irf2bp2	3.0365e-08	0.213565	0.266	0.136	0.00159829	T_early
Zbtb40	3.07255e-08	0.747287	0.107	0.041	0.00161727	T_early
Pabpc1	3.08804e-08	0.193382	1	0.964	0.00162542	T_early
Cdk4	3.12296e-08	0.296738	0.643	0.391	0.0016438	T_early
Pbdc1	3.26112e-08	0.247975	0.295	0.153	0.00171652	T_early
Parp11	3.26232e-08	0.701509	0.117	0.047	0.00171715	T_early
Thtpa	3.42094e-08	0.377508	0.185	0.085	0.00180064	T_early
Morf4l2	3.46894e-08	0.237462	0.364	0.198	0.00182591	T_early
Snd1	3.47989e-08	0.298499	0.451	0.259	0.00183167	T_early
Sec63	3.56642e-08	0.241409	0.477	0.276	0.00187722	T_early
Sc5d	3.5699e-08	0.631953	0.149	0.066	0.00187905	T_early
Cebpz	3.73522e-08	0.197186	0.568	0.339	0.00196607	T_early
Arl13b	3.74496e-08	0.620867	0.127	0.052	0.0019712	T_early
Rcn3	3.81515e-08	0.502014	0.208	0.102	0.00200814	T_early
Parp3	3.81861e-08	0.476542	0.205	0.099	0.00200996	T_early
Tle4	3.83009e-08	0.203603	0.458	0.264	0.002016	T_early
Mthfd2	3.94233e-08	0.5275	0.166	0.075	0.00207508	T_early
Pfdn6	3.94471e-08	0.291521	0.432	0.243	0.00207634	T_early
Acad9	3.95943e-08	0.409526	0.146	0.063	0.00208408	T_early
Bckdk	3.97201e-08	0.299326	0.231	0.113	0.00209071	T_early
Top2b	4.24651e-08	0.274713	0.786	0.535	0.00223519	T_early
Stip1	4.269e-08	0.289598	0.484	0.284	0.00224703	T_early
Rbmxl1	4.32357e-08	0.285401	0.338	0.179	0.00227575	T_early
Cd5	4.57861e-08	0.172504	0.675	0.438	0.00241	T_early
Cct8	4.69888e-08	0.303607	0.766	0.507	0.00247331	T_early
Patz1	4.70701e-08	0.473493	0.198	0.095	0.00247758	T_early
Nr2c2ap	4.72621e-08	0.188093	0.36	0.192	0.00248769	T_early
Kcnn4	4.90533e-08	0.193789	0.552	0.319	0.00258197	T_early
Dhx33	5.00222e-08	0.572174	0.101	0.038	0.00263297	T_early
Cltb	5.01449e-08	0.294554	0.273	0.14	0.00263943	T_early
BC043934	5.06031e-08	0.696448	0.104	0.04	0.00266355	T_early
Xrcc6	5.13035e-08	0.256681	0.179	0.082	0.00270041	T_early
Srsf9	5.3568e-08	0.259848	0.373	0.203	0.0028196	T_early
Kti12	5.42678e-08	0.289108	0.321	0.17	0.00285644	T_early
Trpc4ap	5.73677e-08	0.227976	0.568	0.336	0.00301961	T_early
Mtfr1	5.82106e-08	0.371571	0.192	0.09	0.00306397	T_early
Mrps12	6.11064e-08	0.282595	0.393	0.217	0.0032164	T_early
Fas	6.16275e-08	0.431756	0.153	0.068	0.00324383	T_early
Il27ra	6.47201e-08	0.269634	0.679	0.424	0.00340661	T_early
Enoph1	6.52e-08	0.57096	0.136	0.058	0.00343187	T_early
Ddx49	6.52946e-08	0.292853	0.175	0.08	0.00343685	T_early
Dap3	6.56187e-08	0.295985	0.354	0.197	0.00345391	T_early
Dcaf4	6.62775e-08	0.369801	0.13	0.054	0.00348858	T_early
Pdcd11	6.66407e-08	0.205593	0.211	0.102	0.0035077	T_early
Ncor2	6.73532e-08	0.213473	0.351	0.193	0.0035452	T_early
Galnt12	6.7419e-08	0.265615	0.256	0.131	0.00354867	T_early
Morc2a	6.83079e-08	0.490329	0.12	0.049	0.00359545	T_early
Elp3	6.9021e-08	0.478455	0.166	0.076	0.00363299	T_early
Dse	7.00907e-08	0.443147	0.227	0.115	0.00368929	T_early
Snrpd1	7.22238e-08	0.265184	0.513	0.297	0.00380157	T_early
Mrpl42	7.24689e-08	0.26123	0.403	0.224	0.00381448	T_early
Epc2	7.40904e-08	0.152439	0.308	0.162	0.00389982	T_early
Mrpl24	7.49657e-08	0.18089	0.604	0.35	0.00394589	T_early
Terf2	7.76481e-08	0.292273	0.253	0.13	0.00408709	T_early
Bola3	7.90822e-08	0.241828	0.396	0.219	0.00416257	T_early
Zcchc9	8.12383e-08	0.22564	0.256	0.131	0.00427606	T_early
Psmg2	8.50266e-08	0.19214	0.279	0.143	0.00447546	T_early
Zfp961	8.62922e-08	0.419347	0.13	0.055	0.00454208	T_early
Tm2d1	8.65785e-08	0.301373	0.354	0.192	0.00455715	T_early
Det1	8.66119e-08	0.799818	0.104	0.041	0.0045589	T_early
Glo1	8.90239e-08	0.346826	0.393	0.221	0.00468586	T_early
Pja1	8.99601e-08	0.210403	0.321	0.171	0.00473514	T_early
Ruvbl1	9.07858e-08	0.45589	0.153	0.068	0.0047786	T_early
Tmem185b	9.38753e-08	0.412785	0.198	0.096	0.00494122	T_early
Stoml2	9.45307e-08	0.254094	0.341	0.184	0.00497572	T_early
Cd6	9.46948e-08	0.100233	0.659	0.399	0.00498436	T_early
Pgd	9.57462e-08	0.300085	0.276	0.144	0.0050397	T_early
Galnt11	9.72101e-08	0.406001	0.136	0.059	0.00511675	T_early
Dck	9.84832e-08	0.363889	0.162	0.074	0.00518376	T_early
Ndufs8	9.91164e-08	0.293023	0.451	0.26	0.00521709	T_early
Zc3h12d	1.00399e-07	0.620018	0.127	0.054	0.00528461	T_early
Atp6v1d	1.0249e-07	0.263597	0.555	0.327	0.00539465	T_early
Slc14a1	1.03804e-07	0.581159	0.13	0.056	0.00546382	T_early
Tmem173	1.04617e-07	0.295218	0.399	0.224	0.00550661	T_early
Ube4b	1.05832e-07	0.142835	0.234	0.116	0.00557058	T_early
Chchd3	1.06007e-07	0.128038	0.474	0.263	0.00557981	T_early
AI506816	1.06385e-07	0.174301	0.461	0.262	0.00559966	T_early
Rrp7a	1.06527e-07	0.246854	0.406	0.224	0.00560716	T_early
Vkorc1	1.09209e-07	0.296752	0.185	0.087	0.0057483	T_early
Nfe2l2	1.09259e-07	0.286819	0.318	0.173	0.00575097	T_early
Rnf145	1.12128e-07	0.230753	0.364	0.204	0.00590196	T_early
Tcerg1	1.14366e-07	0.164938	0.429	0.245	0.00601977	T_early
Noct	1.1577e-07	0.289964	0.114	0.046	0.00609365	T_early
Cluap1	1.19746e-07	0.393279	0.166	0.076	0.00630295	T_early
G6pc3	1.25023e-07	0.366641	0.146	0.065	0.00658069	T_early
Cops7a	1.27857e-07	0.282124	0.247	0.126	0.00672986	T_early
Nup43	1.30124e-07	0.728231	0.101	0.039	0.0068492	T_early
Ube2e1	1.32682e-07	0.280798	0.373	0.208	0.00698386	T_early
Akr1b3	1.32975e-07	0.298837	0.779	0.507	0.00699928	T_early
Hmbox1	1.33696e-07	0.372884	0.162	0.075	0.00703721	T_early
Spout1	1.36765e-07	0.349093	0.12	0.05	0.00719879	T_early
Nup188	1.4226e-07	0.414746	0.13	0.056	0.00748798	T_early
Ing3	1.46982e-07	0.264072	0.26	0.134	0.00773655	T_early
Tcp1	1.49332e-07	0.283402	0.688	0.439	0.00786026	T_early
Cad	1.50519e-07	0.570447	0.136	0.06	0.00792273	T_early
Uqcc2	1.51376e-07	0.214595	0.49	0.285	0.00796783	T_early
Ahctf1	1.51518e-07	0.208812	0.308	0.168	0.00797532	T_early
Dguok	1.54548e-07	0.268296	0.461	0.268	0.00813478	T_early
Vps50	1.56407e-07	0.517532	0.123	0.052	0.00823265	T_early
Hdhd2	1.61789e-07	0.495432	0.162	0.075	0.00851594	T_early
Gtf2f1	1.63599e-07	0.175775	0.36	0.201	0.00861118	T_early
Prpf31	1.67758e-07	0.314153	0.237	0.121	0.00883009	T_early
Lrrc42	1.70047e-07	0.572626	0.114	0.047	0.00895062	T_early
Hdgfl3	1.76776e-07	0.157705	0.386	0.217	0.0093048	T_early
Baz2b	1.81134e-07	0.544558	0.107	0.043	0.00953418	T_early
Zc3hc1	1.84577e-07	0.509632	0.127	0.054	0.0097154	T_early
St13	1.87191e-07	0.195401	0.539	0.315	0.009853	T_early
Zbtb21	1.88689e-07	0.365784	0.136	0.06	0.00993183	T_early
Mrps9	1.89509e-07	0.290515	0.263	0.137	0.009975	T_early
Nudt6	1.8952e-07	0.409832	0.117	0.048	0.00997558	T_early
Tmem250-ps	1.90078e-07	0.518337	0.114	0.047	0.0100049	T_early
2810013P06Rik	1.92872e-07	0.119048	0.36	0.198	0.010152	T_early
Abcf2	1.97113e-07	0.416029	0.273	0.147	0.0103753	T_early
Pyurf	1.99313e-07	0.555909	0.136	0.06	0.010491	T_early
Hint3	1.99356e-07	0.263051	0.295	0.157	0.0104933	T_early
Zfp628	2.00871e-07	0.432782	0.14	0.062	0.0105731	T_early
Mak16	2.08901e-07	0.16281	0.448	0.25	0.0109957	T_early
Gm17494	2.15184e-07	0.447374	0.166	0.078	0.0113264	T_early
Eif1ax	2.18036e-07	0.241209	0.38	0.214	0.0114765	T_early
Rpl7l1	2.18886e-07	0.213156	0.318	0.172	0.0115213	T_early
Nasp	2.20693e-07	0.208539	0.299	0.16	0.0116164	T_early
Rnf7	2.23966e-07	0.263138	0.555	0.332	0.0117887	T_early
Cox14	2.26819e-07	0.24318	0.575	0.344	0.0119389	T_early
Mettl25	2.28575e-07	0.384448	0.146	0.066	0.0120313	T_early
Rangap1	2.35312e-07	0.207124	0.37	0.203	0.0123859	T_early
Ccdc115	2.4879e-07	0.293809	0.253	0.132	0.0130953	T_early
Nfu1	2.53238e-07	0.289474	0.338	0.186	0.0133295	T_early
Creg1	2.55489e-07	0.495788	0.182	0.088	0.0134479	T_early
Cct2	2.56625e-07	0.289424	0.831	0.58	0.0135077	T_early
Yrdc	2.66213e-07	0.161551	0.422	0.236	0.0140124	T_early
Sit1	2.76189e-07	0.378885	0.302	0.171	0.0145375	T_early
Smc1a	2.86878e-07	0.147966	0.633	0.384	0.0151001	T_early
Mllt6	2.88636e-07	0.119526	0.36	0.202	0.0151926	T_early
Tmem242	2.95803e-07	0.330392	0.188	0.092	0.0155699	T_early
A230050P20Rik	2.99332e-07	0.310295	0.195	0.097	0.0157556	T_early
Mrpl34	3.06342e-07	0.172552	0.455	0.258	0.0161246	T_early
Gtf2ird2	3.06413e-07	0.629019	0.104	0.042	0.0161284	T_early
Nudc	3.08327e-07	0.289159	0.588	0.36	0.0162291	T_early
Mettl18	3.11029e-07	0.601593	0.104	0.042	0.0163713	T_early
Srpk2	3.11463e-07	0.148788	0.422	0.241	0.0163942	T_early
Tgfbr2	3.13382e-07	0.252442	0.75	0.506	0.0164952	T_early
H3f3a	3.16019e-07	0.223264	0.99	0.902	0.016634	T_early
Lta4h	3.18229e-07	0.165733	0.568	0.332	0.0167503	T_early
Actr6	3.19905e-07	0.479733	0.156	0.073	0.0168385	T_early
Vdac1	3.21519e-07	0.302305	0.419	0.245	0.0169235	T_early
Rbbp7	3.2195e-07	0.286725	0.692	0.45	0.0169462	T_early
Mrpl54	3.24322e-07	0.191028	0.481	0.278	0.017071	T_early
Nab2	3.28265e-07	0.627469	0.123	0.054	0.0172786	T_early
Snai3	3.30362e-07	0.429132	0.146	0.067	0.0173889	T_early
Setd7	3.32946e-07	0.35246	0.166	0.08	0.0175249	T_early
Pdss2	3.40507e-07	0.245903	0.117	0.049	0.0179229	T_early
Cisd2	3.4965e-07	0.20698	0.497	0.292	0.0184042	T_early
D10Jhu81e	3.51347e-07	0.217609	0.354	0.195	0.0184935	T_early
AC164623.1	3.60967e-07	0.510946	0.11	0.046	0.0189999	T_early
Mrps6	3.67279e-07	0.270023	0.256	0.135	0.0193321	T_early
Gga3	3.70552e-07	0.228961	0.198	0.098	0.0195044	T_early
Farsa	3.78804e-07	0.191579	0.315	0.172	0.0199387	T_early
Elmsan1	3.79874e-07	0.174925	0.445	0.26	0.0199951	T_early
Tecpr1	3.82503e-07	0.130702	0.555	0.332	0.0201334	T_early
Ubald1	3.84168e-07	0.147722	0.409	0.23	0.0202211	T_early
Glrx3	3.8544e-07	0.229381	0.451	0.258	0.020288	T_early
Ndufc2	3.90411e-07	0.258348	0.578	0.34	0.0205497	T_early
Polr1e	3.93951e-07	0.449207	0.14	0.063	0.020736	T_early
Me2	4.04082e-07	0.28069	0.409	0.244	0.0212692	T_early
Osbpl9	4.08009e-07	0.175673	0.422	0.242	0.0214759	T_early
Timm22	4.09326e-07	0.457763	0.172	0.083	0.0215453	T_early
Fam60a	4.23262e-07	0.254608	0.218	0.111	0.0222788	T_early
2700060E02Rik	4.23656e-07	0.272484	0.76	0.509	0.0222996	T_early
Umps	4.374e-07	0.205642	0.224	0.114	0.023023	T_early
Ak6	4.38062e-07	0.307581	0.211	0.107	0.0230578	T_early
Ebna1bp2	4.3827e-07	0.197393	0.458	0.264	0.0230688	T_early
Taf2	4.57628e-07	0.405838	0.146	0.068	0.0240877	T_early
Cdc14b	4.75926e-07	0.292586	0.146	0.067	0.0250508	T_early
Srek1	4.82766e-07	0.137212	0.367	0.21	0.0254109	T_early
Dus2	4.84095e-07	0.295283	0.166	0.079	0.0254808	T_early
Ipo11	5.01822e-07	0.50084	0.11	0.046	0.0264139	T_early
Polr3f	5.02839e-07	0.336364	0.175	0.086	0.0264674	T_early
Zmym1	5.09105e-07	0.527986	0.11	0.046	0.0267973	T_early
Erap1	5.09707e-07	0.157799	0.455	0.266	0.0268289	T_early
Pcca	5.20172e-07	0.44685	0.11	0.046	0.0273798	T_early
Ddx50	5.21469e-07	0.147723	0.367	0.202	0.027448	T_early
Colgalt1	5.44995e-07	0.201405	0.26	0.139	0.0286864	T_early
Cetn3	5.52235e-07	0.190193	0.422	0.244	0.0290675	T_early
Ndufb5	5.64498e-07	0.286896	0.669	0.44	0.0297129	T_early
Ipcef1	5.66855e-07	0.127207	0.455	0.266	0.029837	T_early
Anapc5	5.77706e-07	0.210564	0.568	0.352	0.0304081	T_early
Mrpl15	5.7846e-07	0.213569	0.481	0.277	0.0304478	T_early
Cct7	5.95589e-07	0.286802	0.753	0.514	0.0313494	T_early
Htt	5.96943e-07	0.141868	0.175	0.085	0.0314207	T_early
Slc35e2	5.97243e-07	0.371312	0.166	0.08	0.0314365	T_early
Rpp14	6.00973e-07	0.371969	0.14	0.064	0.0316328	T_early
Tsen34	6.12739e-07	0.344272	0.162	0.077	0.0322522	T_early
Dis3l2	6.17535e-07	0.525225	0.146	0.068	0.0325046	T_early
Clns1a	6.22105e-07	0.216558	0.422	0.242	0.0327451	T_early
Nfkb2	6.3878e-07	0.466506	0.179	0.089	0.0336228	T_early
D2hgdh	6.42361e-07	0.278236	0.143	0.066	0.0338113	T_early
Traf3ip2	6.49142e-07	0.18883	0.315	0.175	0.0341682	T_early
Atm	6.54924e-07	0.114421	0.321	0.178	0.0344726	T_early
Abraxas1	6.69787e-07	0.584253	0.114	0.049	0.0352549	T_early
Nrip1	6.82145e-07	0.122023	0.302	0.166	0.0359054	T_early
Pcgf6	6.89869e-07	0.290237	0.153	0.072	0.0363119	T_early
Chd4	6.99374e-07	0.161757	0.649	0.415	0.0368122	T_early
Rrn3	7.03964e-07	0.228005	0.179	0.087	0.0370539	T_early
Trbv12-1	7.17936e-07	1.27848	0.117	0.053	0.0377893	T_early
Supv3l1	7.2091e-07	0.379145	0.136	0.062	0.0379458	T_early
2310009A05Rik	7.21232e-07	0.354798	0.247	0.133	0.0379628	T_early
Brix1	7.30324e-07	0.163461	0.338	0.186	0.0384413	T_early
Ccs	7.33929e-07	0.222814	0.318	0.174	0.0386311	T_early
Thoc1	7.3926e-07	0.239061	0.26	0.14	0.0389117	T_early
Arl2	7.49154e-07	0.300767	0.12	0.052	0.0394324	T_early
Hspa8	7.56712e-07	0.154687	1	0.969	0.0398303	T_early
Zfp335os	7.59196e-07	0.412134	0.123	0.054	0.0399611	T_early
Exosc10	7.64117e-07	0.228207	0.39	0.226	0.0402201	T_early
Trappc6a	7.71069e-07	0.236331	0.308	0.171	0.040586	T_early
Mrpl52	7.77945e-07	0.263632	0.76	0.549	0.0409479	T_early
Eif3g	7.79732e-07	0.236179	0.545	0.335	0.041042	T_early
Tspan14	7.8034e-07	0.208724	0.247	0.13	0.041074	T_early
Ifi30	7.93192e-07	0.409581	0.13	0.058	0.0417505	T_early
Cdpf1	8.00927e-07	0.168127	0.221	0.113	0.0421576	T_early
Hmg20a	8.06558e-07	0.244284	0.234	0.125	0.042454	T_early
Dhodh	8.16589e-07	0.576819	0.127	0.057	0.042982	T_early
Wbscr22	8.26669e-07	0.141901	0.321	0.176	0.0435126	T_early
Wdr18	8.35896e-07	0.271227	0.231	0.121	0.0439982	T_early
Suv39h1	8.37465e-07	0.473544	0.12	0.053	0.0440808	T_early
Rnf123	8.43123e-07	0.12256	0.302	0.167	0.0443786	T_early
Isca1	8.50078e-07	0.169917	0.321	0.176	0.0447447	T_early
Dot1l	8.53329e-07	0.202008	0.195	0.098	0.0449158	T_early
2410015M20Rik	8.58376e-07	0.227068	0.692	0.433	0.0451815	T_early
Zfp579	8.84186e-07	0.567768	0.107	0.045	0.04654	T_early
Sgpp1	8.8654e-07	0.254674	0.269	0.145	0.0466639	T_early
Ube2j1	8.87861e-07	0.137216	0.442	0.252	0.0467335	T_early
Dedd2	8.92897e-07	0.187362	0.25	0.132	0.0469985	T_early
Slc7a6	8.99269e-07	0.269399	0.153	0.072	0.0473339	T_early
Mcm2	9.16097e-07	0.176204	0.214	0.11	0.0482197	T_early
Timm13	9.2078e-07	0.201885	0.695	0.437	0.0484662	T_early
Ddt	9.27036e-07	0.106769	0.315	0.17	0.0487955	T_early
Ncbp1	9.35282e-07	0.12549	0.354	0.2	0.0492295	T_early
Tpcn1	9.37784e-07	0.31142	0.153	0.072	0.0493612	T_early
Apobec3	9.55114e-07	0.204731	0.74	0.488	0.0502734	T_early
Zfp7	9.59653e-07	0.418422	0.136	0.062	0.0505123	T_early
Tmem181a	9.72178e-07	0.218832	0.221	0.116	0.0511716	T_early
Lamp1	9.89414e-07	0.215537	0.653	0.416	0.0520788	T_early
Mrps7	1.03655e-06	0.173768	0.373	0.211	0.0545597	T_early
Trbv3	1.03799e-06	1.72048	0.12	0.058	0.0546357	T_early
Tagln2	1.04608e-06	0.194867	0.932	0.727	0.0550617	T_early
Psme3	1.05886e-06	0.272581	0.458	0.275	0.0557341	T_early
Ftx	1.06721e-06	0.420399	0.11	0.047	0.0561738	T_early
Nop14	1.06948e-06	0.149665	0.282	0.156	0.0562932	T_early
Ranbp9	1.07066e-06	0.104131	0.338	0.19	0.0563553	T_early
Polr3b	1.10444e-06	0.152763	0.221	0.114	0.0581331	T_early
Gm43362	1.10657e-06	0.135785	0.377	0.215	0.0582454	T_early
Arid2	1.1271e-06	0.156065	0.214	0.11	0.0593259	T_early
Smarcad1	1.13018e-06	0.143002	0.227	0.119	0.0594882	T_early
Cpsf6	1.14693e-06	0.112397	0.487	0.293	0.0603697	T_early
Tusc3	1.17069e-06	0.183523	0.26	0.14	0.0616203	T_early
Lonp1	1.17294e-06	0.224223	0.253	0.137	0.0617388	T_early
Tgfbr1	1.17792e-06	0.294825	0.162	0.079	0.0620008	T_early
Commd3	1.19409e-06	0.23254	0.38	0.22	0.062852	T_early
Gfer	1.21126e-06	0.351401	0.214	0.113	0.063756	T_early
Hnrnpu	1.24541e-06	0.219644	0.938	0.793	0.0655537	T_early
Lrrc14	1.25121e-06	0.26239	0.146	0.068	0.0658586	T_early
Zfp326	1.25771e-06	0.330367	0.201	0.105	0.066201	T_early
Tomm20	1.2718e-06	0.253777	0.731	0.489	0.0669423	T_early
Psmd6	1.31094e-06	0.176431	0.393	0.226	0.0690024	T_early
Etf1	1.31875e-06	0.154329	0.458	0.267	0.069414	T_early
Tcof1	1.34984e-06	0.179794	0.594	0.361	0.0710504	T_early
Smim10l1	1.35438e-06	0.332159	0.227	0.122	0.0712893	T_early
Txnrd2	1.37311e-06	0.518145	0.114	0.05	0.0722752	T_early
Pja2	1.38547e-06	0.21462	0.179	0.089	0.0729258	T_early
Stard5	1.39861e-06	0.432867	0.175	0.088	0.073617	T_early
Bccip	1.40606e-06	0.175544	0.494	0.286	0.0740096	T_early
Gpi1	1.40631e-06	0.220434	0.922	0.733	0.0740224	T_early
Usp11	1.40694e-06	0.154323	0.185	0.093	0.0740558	T_early
AB124611	1.42083e-06	0.178424	0.474	0.281	0.0747866	T_early
Tm2d3	1.48462e-06	0.222061	0.227	0.119	0.0781442	T_early
Ssr2	1.49681e-06	0.216339	0.49	0.291	0.0787861	T_early
Mcts1	1.50207e-06	0.223186	0.438	0.263	0.0790632	T_early
Med16	1.5142e-06	0.369671	0.156	0.075	0.0797014	T_early
Siva1	1.56324e-06	0.283287	0.214	0.112	0.0822825	T_early
Mcph1	1.57805e-06	0.299152	0.149	0.072	0.0830621	T_early
Ndufv1	1.60275e-06	0.154695	0.403	0.23	0.0843622	T_early
Ola1	1.6232e-06	0.208905	0.438	0.258	0.0854387	T_early
Zmym2	1.65094e-06	0.264727	0.26	0.144	0.086899	T_early
Gnpnat1	1.65455e-06	0.17347	0.192	0.097	0.087089	T_early
5730455P16Rik	1.6666e-06	0.425782	0.104	0.044	0.0877232	T_early
Ring1	1.67924e-06	0.144285	0.24	0.127	0.0883882	T_early
Cox18	1.68793e-06	0.339914	0.166	0.082	0.088846	T_early
Cnst	1.74026e-06	0.196208	0.14	0.065	0.0916003	T_early
Timm44	1.78585e-06	0.250686	0.231	0.123	0.0940002	T_early
Slc7a5	1.787e-06	0.192063	0.156	0.075	0.0940604	T_early
Mrpl48	1.81448e-06	0.316183	0.169	0.084	0.0955071	T_early
Zranb2	1.82909e-06	0.132562	0.419	0.25	0.0962757	T_early
Abi3	1.84579e-06	0.186252	0.26	0.142	0.0971553	T_early
Tagap	1.9257e-06	0.186558	0.471	0.29	0.101361	T_early
Nol8	1.93328e-06	0.104264	0.315	0.178	0.10176	T_early
Caprin1	1.93832e-06	0.210693	0.653	0.435	0.102025	T_early
Snrpd2	1.94814e-06	0.256542	0.727	0.477	0.102542	T_early
Sclt1	1.96898e-06	0.333011	0.166	0.083	0.103639	T_early
Cycs	1.96938e-06	0.269542	0.679	0.451	0.10366	T_early
Xpo6	2.0018e-06	0.122283	0.318	0.18	0.105367	T_early
Tpi1	2.01915e-06	0.231256	0.266	0.147	0.10628	T_early
Zfp553	2.08935e-06	0.2795	0.133	0.061	0.109975	T_early
Gadd45gip1	2.09097e-06	0.159545	0.497	0.293	0.11006	T_early
Kansl2	2.10587e-06	0.163642	0.276	0.151	0.110845	T_early
Gm11131	2.13966e-06	0.281512	0.175	0.088	0.112623	T_early
2810428I15Rik	2.16774e-06	0.23826	0.406	0.242	0.114101	T_early
Ezr	2.19054e-06	0.240107	0.89	0.661	0.115301	T_early
Gm11346	2.21437e-06	0.169055	0.36	0.212	0.116556	T_early
Pcyt2	2.27125e-06	0.167908	0.247	0.133	0.11955	T_early
Adck5	2.28801e-06	0.282772	0.133	0.062	0.120431	T_early
Rbm8a	2.32389e-06	0.162843	0.516	0.303	0.12232	T_early
Eif3d	2.35238e-06	0.199243	0.659	0.42	0.12382	T_early
Slc25a25	2.4625e-06	0.181582	0.192	0.098	0.129616	T_early
Aff1	2.47468e-06	0.25965	0.234	0.129	0.130257	T_early
Zscan2	2.4836e-06	0.39918	0.117	0.052	0.130727	T_early
Rpf1	2.55179e-06	0.119974	0.318	0.178	0.134316	T_early
Mlec	2.68475e-06	0.130343	0.308	0.175	0.141315	T_early
Ddx1	2.79878e-06	0.324133	0.195	0.102	0.147317	T_early
Ap1ar	2.84269e-06	0.12818	0.269	0.149	0.149628	T_early
Lztfl1	2.85983e-06	0.336964	0.11	0.049	0.15053	T_early
1110034G24Rik	2.96755e-06	0.12635	0.24	0.129	0.1562	T_early
Slc35a4	3.06864e-06	0.132789	0.315	0.176	0.161521	T_early
Mov10	3.09622e-06	0.355332	0.136	0.065	0.162972	T_early
Plin3	3.16769e-06	0.376638	0.179	0.092	0.166734	T_early
Mrps22	3.24097e-06	0.462236	0.107	0.047	0.170592	T_early
Timm50	3.25277e-06	0.128471	0.24	0.128	0.171213	T_early
Stam	3.27522e-06	0.321637	0.123	0.057	0.172394	T_early
Smurf2	3.30676e-06	0.238447	0.205	0.108	0.174055	T_early
Anapc13	3.38e-06	0.152096	0.338	0.195	0.17791	T_early
Mcmbp	3.39165e-06	0.109708	0.399	0.233	0.178523	T_early
Rnmt	3.42077e-06	0.326784	0.227	0.125	0.180055	T_early
Siah2	3.45914e-06	0.214865	0.273	0.153	0.182075	T_early
Paics	3.47973e-06	0.149602	0.529	0.319	0.183159	T_early
AY036118	3.58742e-06	0.155436	0.964	0.926	0.188827	T_early
Syncrip	3.63753e-06	0.124949	0.526	0.318	0.191465	T_early
4932438A13Rik	3.68425e-06	0.120504	0.568	0.367	0.193924	T_early
Pip4k2b	3.78563e-06	0.198676	0.162	0.081	0.19926	T_early
Scarb2	3.80749e-06	0.127289	0.292	0.164	0.200411	T_early
Herpud1	3.86792e-06	0.100832	0.338	0.193	0.203592	T_early
Dnajb9	3.93095e-06	0.111929	0.312	0.179	0.20691	T_early
Raver1.1	4.00317e-06	0.129172	0.299	0.167	0.210711	T_early
Rsl1d1	4.05526e-06	0.132757	0.526	0.315	0.213453	T_early
Txnl4a	4.08555e-06	0.192097	0.302	0.172	0.215047	T_early
Riok1	4.10172e-06	0.107731	0.406	0.242	0.215898	T_early
Stk19	4.17483e-06	0.148345	0.247	0.134	0.219746	T_early
Stambp	4.2033e-06	0.169075	0.195	0.102	0.221245	T_early
Mboat7	4.22257e-06	0.255251	0.201	0.107	0.222259	T_early
Zpr1	4.44181e-06	0.186153	0.351	0.206	0.233799	T_early
Fmc1	4.45456e-06	0.146059	0.338	0.194	0.23447	T_early
Mpc1	4.48352e-06	0.216152	0.383	0.226	0.235995	T_early
Dazap1	4.50914e-06	0.154361	0.523	0.319	0.237343	T_early
Scai	4.54529e-06	0.283031	0.123	0.057	0.239246	T_early
Rcn2	4.65813e-06	0.366239	0.175	0.091	0.245185	T_early
Pigx	4.85875e-06	0.17406	0.442	0.261	0.255745	T_early
Hbs1l	4.88365e-06	0.122269	0.276	0.156	0.257056	T_early
Usp33	4.9374e-06	0.303387	0.12	0.055	0.259885	T_early
Gm29243	5.06095e-06	0.364869	0.156	0.078	0.266388	T_early
Idh3g	5.08915e-06	0.196428	0.334	0.194	0.267873	T_early
Pgk1	5.11407e-06	0.27579	0.562	0.354	0.269184	T_early
Qdpr	5.12166e-06	0.187865	0.403	0.236	0.269584	T_early
Cinp	5.24018e-06	0.308093	0.133	0.063	0.275822	T_early
Gltp	5.39594e-06	0.215402	0.705	0.456	0.284021	T_early
Map1s	5.43702e-06	0.313924	0.227	0.125	0.286183	T_early
Parp2	5.43812e-06	0.12717	0.234	0.127	0.286241	T_early
Mrpl46	5.63802e-06	0.197379	0.205	0.109	0.296763	T_early
Trim59	5.64417e-06	0.237161	0.289	0.167	0.297087	T_early
Ofd1	5.69246e-06	0.241215	0.133	0.064	0.299628	T_early
Ppp6r1	5.75781e-06	0.138238	0.62	0.383	0.303068	T_early
Fiz1	5.84495e-06	0.20344	0.192	0.1	0.307655	T_early
Elp5	5.86537e-06	0.334644	0.195	0.104	0.30873	T_early
Zfp395	5.87857e-06	0.260998	0.143	0.07	0.309425	T_early
Hdgf	5.88358e-06	0.194893	0.623	0.407	0.309688	T_early
Dynlt1-ps1	5.88916e-06	0.226702	0.214	0.116	0.309982	T_early
Preb	5.93499e-06	0.114753	0.429	0.26	0.312394	T_early
Gpn1	5.99295e-06	0.217918	0.153	0.075	0.315445	T_early
Il2rb	6.06027e-06	0.425668	0.756	0.65	0.318988	T_early
Dcaf6	6.13372e-06	0.165442	0.104	0.046	0.322855	T_early
Tapbp	6.16095e-06	0.185303	0.779	0.563	0.324288	T_early
Max	6.2184e-06	0.184999	0.474	0.29	0.327312	T_early
Zbtb44	6.39063e-06	0.173195	0.221	0.121	0.336377	T_early
Ergic1	6.51234e-06	0.327047	0.123	0.058	0.342783	T_early
Gspt1	6.53064e-06	0.150475	0.526	0.328	0.343747	T_early
Ndufa9	6.56986e-06	0.127916	0.406	0.237	0.345811	T_early
Iqcc	6.67443e-06	0.394473	0.101	0.044	0.351315	T_early
Fundc1	6.68741e-06	0.247563	0.201	0.107	0.351998	T_early
Med11	6.91061e-06	0.259768	0.214	0.116	0.363747	T_early
Mrpl51	6.95383e-06	0.283235	0.263	0.149	0.366022	T_early
Bop1	6.98335e-06	0.191161	0.24	0.132	0.367576	T_early
Sac3d1	7.00934e-06	0.370286	0.123	0.058	0.368943	T_early
Eral1	7.03882e-06	0.285448	0.153	0.077	0.370495	T_early
Mrpl41	7.11342e-06	0.241654	0.295	0.17	0.374422	T_early
Gm10131	7.17706e-06	0.332109	0.172	0.089	0.377772	T_early
Zmynd8	7.4186e-06	0.191265	0.25	0.142	0.390485	T_early
Rarg	7.69384e-06	0.510529	0.136	0.068	0.404973	T_early
Letm2	7.7042e-06	0.236684	0.162	0.083	0.405518	T_early
2810474O19Rik	7.76287e-06	0.197149	0.539	0.351	0.408606	T_early
Zfp277	8.01649e-06	0.235735	0.256	0.146	0.421956	T_early
Smn1	8.51244e-06	0.211564	0.214	0.117	0.448061	T_early
Eif2b2	8.62493e-06	0.129245	0.36	0.209	0.453982	T_early
Gclm	8.70698e-06	0.24071	0.179	0.094	0.4583	T_early
Traf5	8.89003e-06	0.139641	0.276	0.157	0.467935	T_early
Icam2	9.02334e-06	0.143169	0.347	0.202	0.474952	T_early
Wdr41	9.03021e-06	0.257981	0.104	0.046	0.475314	T_early
Txn2	9.21769e-06	0.191584	0.737	0.468	0.485182	T_early
Ctso	9.47662e-06	0.142846	0.205	0.109	0.498811	T_early
Cdipt	9.51799e-06	0.164635	0.526	0.325	0.500989	T_early
Trim28	9.55462e-06	0.164809	0.487	0.302	0.502917	T_early
Rad50	9.93698e-06	0.101723	0.289	0.167	0.523043	T_early
Tspyl3	1.00809e-05	0.266803	0.162	0.083	0.530617	T_early
Oas3	1.00863e-05	0.302996	0.143	0.071	0.530903	T_early
Psmc5	1.0109e-05	0.142648	0.523	0.31	0.532096	T_early
Mafk	1.02203e-05	0.14235	0.153	0.077	0.537955	T_early
Uvrag	1.02737e-05	0.108544	0.357	0.211	0.540765	T_early
Rexo4	1.05483e-05	0.154821	0.305	0.176	0.55522	T_early
Rdh14	1.07415e-05	0.103885	0.175	0.09	0.565389	T_early
Nol12	1.07987e-05	0.125387	0.211	0.115	0.568402	T_early
Kcna3	1.08034e-05	0.129194	0.273	0.157	0.568645	T_early
Phb2	1.08059e-05	0.225147	0.682	0.444	0.56878	T_early
Pold2	1.08413e-05	0.16352	0.218	0.118	0.570642	T_early
Tamm41	1.09948e-05	0.321636	0.11	0.051	0.578723	T_early
Man2a2	1.10064e-05	0.271611	0.127	0.061	0.579333	T_early
Hax1	1.10367e-05	0.160708	0.218	0.118	0.580925	T_early
Ubqln4	1.10412e-05	0.241781	0.162	0.084	0.581166	T_early
Stx1a	1.10593e-05	0.245573	0.104	0.047	0.582116	T_early
Mrpl21	1.13233e-05	0.181603	0.422	0.259	0.596012	T_early
Ndufv2	1.13307e-05	0.199419	0.617	0.387	0.596401	T_early
Utrn	1.14434e-05	0.167845	0.692	0.464	0.602334	T_early
Fundc2	1.14857e-05	0.174361	0.487	0.298	0.604559	T_early
Pfdn4	1.16522e-05	0.260836	0.175	0.092	0.613326	T_early
Ints9	1.17263e-05	0.220196	0.182	0.096	0.617228	T_early
Cdip1	1.1783e-05	0.37091	0.127	0.062	0.620211	T_early
Actl6a	1.17934e-05	0.138373	0.308	0.179	0.620756	T_early
Mrps17	1.19211e-05	0.120506	0.39	0.229	0.627477	T_early
Ifi27	1.1985e-05	0.184202	0.705	0.463	0.630841	T_early
Gnpat	1.22051e-05	0.140107	0.214	0.117	0.642429	T_early
Slc25a4	1.23016e-05	0.112958	0.39	0.233	0.647505	T_early
Rrad	1.25104e-05	0.254636	0.162	0.084	0.658496	T_early
Mrps15	1.25317e-05	0.126902	0.516	0.323	0.659618	T_early
Mpst	1.2634e-05	0.120514	0.224	0.123	0.665002	T_early
Cept1	1.28611e-05	0.116191	0.227	0.125	0.676955	T_early
Thumpd3	1.29969e-05	0.136502	0.244	0.136	0.684106	T_early
Prim1	1.32997e-05	0.286553	0.11	0.051	0.700044	T_early
U2af1	1.33754e-05	0.159775	0.666	0.407	0.704028	T_early
4930523C07Rik	1.34863e-05	0.471254	0.114	0.054	0.709865	T_early
C87436	1.40048e-05	0.106198	0.247	0.138	0.737159	T_early
Ttc37	1.40821e-05	0.135666	0.117	0.055	0.741227	T_early
Map2k7.1	1.4094e-05	0.130321	0.179	0.094	0.741853	T_early
Capn15	1.446e-05	0.118575	0.166	0.086	0.761118	T_early
Zc3h10	1.46037e-05	0.172172	0.159	0.081	0.768679	T_early
Serbp1	1.48514e-05	0.17104	0.961	0.825	0.781719	T_early
Hmgn2	1.49989e-05	0.138178	0.487	0.307	0.789482	T_early
Gm26825	1.50124e-05	0.311069	0.487	0.33	0.790193	T_early
Ncl	1.50805e-05	0.212035	0.912	0.742	0.793779	T_early
Tmem11	1.53947e-05	0.10721	0.276	0.156	0.810316	T_early
Dcun1d2	1.55203e-05	0.405364	0.104	0.048	0.816926	T_early
Vmac	1.56006e-05	0.350269	0.104	0.047	0.821153	T_early
Setdb1	1.57989e-05	0.181484	0.162	0.084	0.831589	T_early
Tor1a	1.59734e-05	0.10377	0.331	0.192	0.840777	T_early
Setd6	1.62025e-05	0.399852	0.143	0.072	0.852833	T_early
Naa38	1.65242e-05	0.182946	0.451	0.276	0.869769	T_early
Eci2	1.70025e-05	0.276675	0.208	0.115	0.894943	T_early
Emc6	1.74621e-05	0.130238	0.558	0.338	0.919134	T_early
Tbc1d5	1.74941e-05	0.221199	0.162	0.085	0.920822	T_early
Ddx5	1.75416e-05	0.140037	1	0.978	0.923322	T_early
Atp5a1	1.82457e-05	0.189566	0.935	0.757	0.960378	T_early
Bcl3	1.83654e-05	0.416097	0.162	0.088	0.966679	T_early
Gt(ROSA)26Sor	1.85159e-05	0.119293	0.172	0.091	0.974601	T_early
Impdh1	1.96268e-05	0.117709	0.412	0.251	1	T_early
Cic	2.03005e-05	0.13796	0.318	0.19	1	T_early
Bola1	2.06311e-05	0.214803	0.149	0.077	1	T_early
Pola2	2.11304e-05	0.133763	0.221	0.123	1	T_early
Xrcc4	2.16768e-05	0.117923	0.208	0.114	1	T_early
Tomm40l	2.19335e-05	0.364414	0.123	0.06	1	T_early
Rtcb	2.19357e-05	0.141238	0.51	0.317	1	T_early
Eif4e	2.1961e-05	0.141078	0.338	0.199	1	T_early
Mmd	2.20176e-05	0.302565	0.162	0.086	1	T_early
Kpnb1	2.21212e-05	0.186884	0.471	0.304	1	T_early
Hmgcs1	2.24496e-05	0.113887	0.192	0.104	1	T_early
Rab28	2.25172e-05	0.174363	0.182	0.097	1	T_early
Snrpa1	2.2865e-05	0.165071	0.338	0.2	1	T_early
Mrm1	2.3135e-05	0.161261	0.123	0.06	1	T_early
Hpf1	2.34569e-05	0.153434	0.312	0.185	1	T_early
Pias2	2.34588e-05	0.165195	0.146	0.075	1	T_early
Pus3	2.3559e-05	0.142311	0.162	0.085	1	T_early
Cops6	2.41636e-05	0.117335	0.568	0.346	1	T_early
Arl14ep	2.44289e-05	0.21323	0.123	0.06	1	T_early
Nudt16	2.46033e-05	0.15494	0.247	0.14	1	T_early
Cpsf3	2.51528e-05	0.1014	0.373	0.226	1	T_early
Mettl14	2.54896e-05	0.219006	0.146	0.075	1	T_early
Gm10524	2.60346e-05	0.206761	0.136	0.069	1	T_early
Selenop	2.60602e-05	0.391711	0.351	0.225	1	T_early
Zfp414	2.61935e-05	0.175139	0.201	0.11	1	T_early
Parp1	2.62294e-05	0.106448	0.338	0.201	1	T_early
Nkiras2	2.69784e-05	0.209949	0.166	0.087	1	T_early
Maip1	2.75965e-05	0.152635	0.182	0.097	1	T_early
Mdh1	2.77499e-05	0.22766	0.766	0.541	1	T_early
2210013O21Rik	2.80269e-05	0.185857	0.198	0.109	1	T_early
Btf3	2.807e-05	0.155853	0.994	0.912	1	T_early
Tbrg1	2.82248e-05	0.150703	0.649	0.422	1	T_early
Mtr	2.84767e-05	0.132128	0.182	0.098	1	T_early
Rrnad1	2.96368e-05	0.12868	0.185	0.101	1	T_early
Snu13	3.07387e-05	0.22516	0.633	0.43	1	T_early
Ikbkap	3.20259e-05	0.103506	0.149	0.077	1	T_early
Zbtb17	3.25012e-05	0.100628	0.159	0.084	1	T_early
Nudt19	3.30813e-05	0.229308	0.286	0.17	1	T_early
Mrps14	3.31876e-05	0.111356	0.565	0.353	1	T_early
Anapc16	3.32397e-05	0.130664	0.409	0.247	1	T_early
Cyc1	3.38552e-05	0.148214	0.51	0.316	1	T_early
Fam206a	3.45037e-05	0.49808	0.104	0.05	1	T_early
Ndor1	3.47379e-05	0.134428	0.162	0.086	1	T_early
Alkbh3	3.57517e-05	0.115354	0.175	0.094	1	T_early
Ube2v2	3.58353e-05	0.310235	0.12	0.059	1	T_early
Tmem64	3.63408e-05	0.144801	0.12	0.059	1	T_early
Pigo	3.69116e-05	0.13464	0.114	0.055	1	T_early
Desi2	3.71355e-05	0.116264	0.338	0.206	1	T_early
Zfp692	3.77471e-05	0.219561	0.179	0.098	1	T_early
Isoc2a	3.79277e-05	0.163555	0.192	0.105	1	T_early
Rad23a	3.79757e-05	0.169902	0.474	0.302	1	T_early
Ascc2	3.84406e-05	0.171293	0.153	0.08	1	T_early
Gtf2h3	3.88011e-05	0.246934	0.153	0.08	1	T_early
Sgf29	3.88511e-05	0.133327	0.302	0.179	1	T_early
Ccdc34	3.94497e-05	0.309172	0.101	0.047	1	T_early
Spice1	3.94864e-05	0.160016	0.169	0.091	1	T_early
Med19	3.98636e-05	0.167806	0.195	0.109	1	T_early
Naa20	4.0365e-05	0.269332	0.269	0.159	1	T_early
Neil1	4.07625e-05	0.476782	0.13	0.067	1	T_early
Gm26526	4.14934e-05	0.233184	0.208	0.117	1	T_early
Nt5c3	4.20438e-05	0.187585	0.25	0.147	1	T_early
Rbmx2	4.26584e-05	0.25185	0.114	0.055	1	T_early
Rnaseh2a	4.35165e-05	0.164605	0.218	0.124	1	T_early
Rraga	4.42494e-05	0.149528	0.325	0.196	1	T_early
Fdft1	4.45958e-05	0.280238	0.133	0.068	1	T_early
Timmdc1	4.57736e-05	0.197488	0.169	0.092	1	T_early
Mtrr	4.84342e-05	0.233322	0.117	0.058	1	T_early
Nudt5	4.94653e-05	0.150424	0.182	0.1	1	T_early
Dcaf17	5.02519e-05	0.100811	0.237	0.138	1	T_early
Atp6v1b2	5.02864e-05	0.11517	0.347	0.212	1	T_early
Ppp2r3d	5.14148e-05	0.33261	0.117	0.058	1	T_early
3110009E18Rik	5.24872e-05	0.315472	0.123	0.062	1	T_early
Trappc11	5.3446e-05	0.122158	0.221	0.127	1	T_early
Idnk	5.38928e-05	0.111837	0.568	0.36	1	T_early
Fam122a	5.48032e-05	0.13961	0.218	0.124	1	T_early
Gmpr2	5.60331e-05	0.231568	0.205	0.116	1	T_early
Alkbh6	5.67439e-05	0.110689	0.185	0.102	1	T_early
Akap13	5.70638e-05	0.155853	0.919	0.728	1	T_early
Rpain	5.74683e-05	0.125552	0.159	0.085	1	T_early
Vma21	5.76486e-05	0.143011	0.24	0.14	1	T_early
Seh1l	5.82727e-05	0.32159	0.218	0.128	1	T_early
Slc25a3	5.9755e-05	0.182832	0.932	0.76	1	T_early
Tmem260	6.03959e-05	0.108693	0.153	0.081	1	T_early
Gramd3	6.05928e-05	0.124835	0.847	0.67	1	T_early
Ndufs3	6.12653e-05	0.162311	0.523	0.335	1	T_early
Dus3l	6.13164e-05	0.146931	0.244	0.144	1	T_early
Tbc1d14	6.15277e-05	0.235595	0.169	0.093	1	T_early
Eri3	6.26452e-05	0.105817	0.162	0.087	1	T_early
Tmem63a	6.27502e-05	0.216388	0.153	0.082	1	T_early
Mvp	6.31526e-05	0.148669	0.107	0.052	1	T_early
Ran	6.62171e-05	0.218177	0.899	0.684	1	T_early
Tnfaip8l1	6.62193e-05	0.268607	0.192	0.108	1	T_early
Mpv17l2	6.63907e-05	0.163434	0.302	0.183	1	T_early
Dynlt1b	6.65313e-05	0.107178	0.156	0.083	1	T_early
Nol7	6.70181e-05	0.170808	0.769	0.526	1	T_early
Atp6ap2	6.72418e-05	0.135913	0.295	0.178	1	T_early
Ints13	6.75906e-05	0.167989	0.231	0.134	1	T_early
Gipc1	6.79029e-05	0.294929	0.143	0.076	1	T_early
Nudt14	6.79983e-05	0.186773	0.149	0.079	1	T_early
Hibch	6.82469e-05	0.256047	0.136	0.071	1	T_early
Gpr174	6.92863e-05	0.105526	0.208	0.119	1	T_early
Fbrs	6.96233e-05	0.156325	0.208	0.119	1	T_early
Cisd1	7.02384e-05	0.142078	0.192	0.107	1	T_early
Brox	7.18924e-05	0.167661	0.156	0.084	1	T_early
Pcgf1	7.21012e-05	0.23902	0.13	0.067	1	T_early
Ccdc94	7.43052e-05	0.240899	0.172	0.096	1	T_early
Set	7.68134e-05	0.194062	0.906	0.73	1	T_early
Tpm1	7.71588e-05	0.104482	0.299	0.18	1	T_early
Mrps30	7.73004e-05	0.123146	0.26	0.154	1	T_early
Fars2	7.8432e-05	0.184196	0.185	0.104	1	T_early
Smarcd1	7.84694e-05	0.100203	0.231	0.135	1	T_early
Pigk	8.01293e-05	0.178842	0.211	0.122	1	T_early
Prkcsh	8.28347e-05	0.147778	0.299	0.182	1	T_early
Izumo4	8.49696e-05	0.142742	0.325	0.2	1	T_early
AI662270	8.54947e-05	0.280575	0.117	0.059	1	T_early
Acp1	8.62227e-05	0.117107	0.299	0.183	1	T_early
Eef2	8.85849e-05	0.105022	1	0.979	1	T_early
Impact	8.97321e-05	0.145988	0.101	0.049	1	T_early
Atp5o	9.1215e-05	0.184356	0.786	0.563	1	T_early
Pqbp1	9.12412e-05	0.136611	0.305	0.187	1	T_early
Rtel1	9.18104e-05	0.124725	0.114	0.057	1	T_early
Slx4	9.25859e-05	0.109403	0.133	0.069	1	T_early
Rpap1	9.32297e-05	0.147423	0.133	0.07	1	T_early
Ptcd3	9.50088e-05	0.118815	0.169	0.094	1	T_early
Hnrnpdl	9.60327e-05	0.149275	0.734	0.517	1	T_early
Hnrnpa3	9.75115e-05	0.171406	0.971	0.853	1	T_early
Prps1l3	9.88443e-05	0.114244	0.273	0.164	1	T_early
Imp3	9.91383e-05	0.12832	0.594	0.375	1	T_early
Hpcal1	9.94759e-05	0.194076	0.558	0.364	1	T_early
Tmem126b	0.000100522	0.341444	0.13	0.068	1	T_early
Ctu2	0.000101397	0.115305	0.269	0.16	1	T_early
Ikbkg	0.000107782	0.114891	0.166	0.091	1	T_early
Ubl4a	0.000108136	0.162289	0.247	0.147	1	T_early
Acot2	0.000108875	0.127503	0.169	0.094	1	T_early
Nup205	0.000109039	0.171899	0.107	0.053	1	T_early
Rpp30	0.0001092	0.143304	0.143	0.076	1	T_early
Tnip1	0.000109709	0.110845	0.412	0.258	1	T_early
Coq5	0.000109763	0.144005	0.198	0.114	1	T_early
Bmi1	0.000111806	0.262806	0.143	0.077	1	T_early
2310061I04Rik	0.000112158	0.136868	0.253	0.153	1	T_early
Nudt21	0.000112207	0.122162	0.565	0.359	1	T_early
Nsun4	0.000114669	0.163064	0.114	0.057	1	T_early
Pbx2	0.000114687	0.119319	0.146	0.079	1	T_early
Dhx35	0.000115967	0.147171	0.114	0.057	1	T_early
Cnot10	0.000116494	0.12534	0.247	0.148	1	T_early
Alkbh4	0.000117292	0.142583	0.185	0.105	1	T_early
Commd9	0.000117364	0.336268	0.104	0.051	1	T_early
Ttc32	0.000117585	0.183896	0.123	0.064	1	T_early
Gm43305	0.000118046	0.190761	0.136	0.073	1	T_early
Rev1	0.000120298	0.177287	0.104	0.051	1	T_early
Zfp64	0.000121209	0.190115	0.156	0.086	1	T_early
Fkbp4	0.000124261	0.164264	0.623	0.428	1	T_early
Ahsa1	0.000126482	0.240532	0.558	0.371	1	T_early
Pfdn2	0.000129498	0.16304	0.623	0.396	1	T_early
Stard7	0.000131244	0.105192	0.247	0.147	1	T_early
Mdh2	0.000132758	0.206706	0.808	0.583	1	T_early
Fam98a	0.000133341	0.108144	0.201	0.116	1	T_early
Sptssa	0.000134125	0.12302	0.545	0.341	1	T_early
Hadh	0.00013586	0.163333	0.244	0.145	1	T_early
Rnf5	0.000138647	0.117593	0.406	0.257	1	T_early
Grcc10	0.00014987	0.175679	0.831	0.617	1	T_early
Rrp1	0.000154094	0.145749	0.672	0.449	1	T_early
Jund	0.000154976	0.125247	0.99	0.947	1	T_early
Faap20	0.00015506	0.163513	0.24	0.144	1	T_early
Hsp90aa1	0.000155704	0.139989	0.841	0.648	1	T_early
Fam222b	0.000162368	0.20939	0.123	0.065	1	T_early
Mrps2	0.000175457	0.104776	0.127	0.067	1	T_early
Phf7	0.000183922	0.309853	0.123	0.066	1	T_early
Klf13	0.000186778	0.161962	0.896	0.677	1	T_early
Wars	0.00019134	0.136567	0.211	0.124	1	T_early
Atg2b	0.000193452	0.16111	0.162	0.092	1	T_early
Bpgm	0.000206639	0.56859	0.11	0.057	1	T_early
9430015G10Rik	0.000207165	0.154554	0.11	0.057	1	T_early
Tmem9b	0.000209757	0.125049	0.555	0.362	1	T_early
Ptrhd1	0.00021809	0.290244	0.117	0.061	1	T_early
Zfp668	0.000220991	0.122353	0.13	0.069	1	T_early
Zfp507	0.000226968	0.243	0.104	0.053	1	T_early
Slc25a39	0.000231488	0.103146	0.38	0.237	1	T_early
Hlcs	0.000239199	0.224975	0.114	0.06	1	T_early
Pcbp2	0.000243409	0.133274	0.799	0.558	1	T_early
Fam219b	0.000244775	0.191048	0.133	0.072	1	T_early
Polr1c	0.000245018	0.133111	0.153	0.085	1	T_early
Nt5c2	0.000251664	0.340407	0.127	0.069	1	T_early
Trim34a	0.000252492	0.173806	0.192	0.113	1	T_early
Prr7	0.000253626	0.136879	0.162	0.092	1	T_early
Impa2	0.000268911	0.170979	0.117	0.062	1	T_early
Ptbp1	0.000290099	0.110486	0.597	0.404	1	T_early
Nup133	0.000293589	0.121769	0.104	0.053	1	T_early
Tgif1	0.000294186	0.212117	0.149	0.085	1	T_early
Eif2s1	0.000314021	0.123435	0.51	0.337	1	T_early
Trac	0.000328243	0.159344	0.679	0.478	1	T_early
Eno1	0.00035707	0.131773	0.909	0.746	1	T_early
Arpp19	0.000360348	0.143948	0.714	0.49	1	T_early
Twf1	0.000377217	0.112486	0.179	0.105	1	T_early
Mex3c	0.000380142	0.167765	0.117	0.063	1	T_early
Lpcat3	0.000387609	0.114713	0.172	0.1	1	T_early
Cep162	0.000402104	0.224908	0.101	0.052	1	T_early
Snrpe	0.000471607	0.143516	0.87	0.705	1	T_early
Arfip2	0.000489602	0.139391	0.136	0.077	1	T_early
Zfp397	0.000496547	0.11075	0.13	0.072	1	T_early
Swi5	0.000499596	0.127232	0.672	0.459	1	T_early
Cdc23	0.000500698	0.14818	0.185	0.111	1	T_early
Psmb4	0.000536005	0.129125	0.607	0.41	1	T_early
Eno1b	0.000616525	0.268382	0.107	0.057	1	T_early
Chid1	0.000626346	0.124427	0.107	0.057	1	T_early
Ndufaf1	0.000643075	0.131436	0.136	0.077	1	T_early
Rgs19	0.000664115	0.107496	0.584	0.394	1	T_early
Zfp287	0.000670802	0.266891	0.13	0.074	1	T_early
E430024P14Rik	0.000697323	0.141466	0.162	0.096	1	T_early
Klhdc3	0.000699546	0.10638	0.208	0.127	1	T_early
Dhrs7b	0.000726606	0.173723	0.101	0.053	1	T_early
Cxx1c	0.000747841	0.123373	0.101	0.053	1	T_early
Hsh2d	0.000763586	0.183972	0.114	0.062	1	T_early
Ostc	0.000778796	0.143038	0.636	0.431	1	T_early
Gstp1	0.000783052	0.153438	0.883	0.688	1	T_early
Taco1	0.000797862	0.198789	0.107	0.058	1	T_early
Mtx2	0.000802693	0.142868	0.162	0.095	1	T_early
Rassf3	0.000817321	0.101343	0.107	0.058	1	T_early
Yif1a	0.000828777	0.162279	0.146	0.085	1	T_early
Arhgap9	0.000831234	0.130047	0.753	0.53	1	T_early
Tpt1-ps3	0.000841762	0.152414	0.14	0.08	1	T_early
Psma7	0.000859169	0.177553	0.792	0.58	1	T_early
Mta1	0.00086996	0.156567	0.114	0.063	1	T_early
Zfp472	0.00096491	0.101453	0.143	0.083	1	T_early
Gtf3c5	0.000969145	0.161405	0.101	0.054	1	T_early
Psma5	0.000990381	0.104557	0.588	0.392	1	T_early
Fam120c	0.00102849	0.226477	0.107	0.059	1	T_early
Junb	0.00103978	0.11794	0.951	0.901	1	T_early
AC163282.1	0.00108418	0.133777	0.114	0.063	1	T_early
2310009B15Rik	0.00109635	0.136383	0.104	0.057	1	T_early
Frat1	0.0011523	0.157171	0.104	0.057	1	T_early
Zfp444	0.00116729	0.121984	0.156	0.093	1	T_early
Pnpt1	0.00118016	0.135211	0.146	0.086	1	T_early
Ndufa6	0.0012718	0.140359	0.922	0.734	1	T_early
Sfpq	0.00127526	0.103734	0.831	0.657	1	T_early
Isg15	0.00138714	0.20124	0.169	0.103	1	T_early
Fam49b	0.00142973	0.111192	0.734	0.517	1	T_early
1810034E14Rik	0.00154719	0.111578	0.133	0.078	1	T_early
Coro1a	0.00198092	0.102394	1	0.969	1	T_early
Sumf2	0.0021617	0.182819	0.114	0.065	1	T_early
Rabac1	0.00218786	0.111136	0.847	0.651	1	T_early
Slc35a1	0.00230678	0.219334	0.101	0.057	1	T_early
Uxt	0.00284796	0.16227	0.123	0.073	1	T_early
Tmem258	0.00294904	0.10352	0.76	0.549	1	T_early
Uqcrfs1	0.00347038	0.118236	0.75	0.522	1	T_early
Uqcrq	0.00358848	0.115612	0.776	0.569	1	T_early
Pan2	0.00444815	0.117087	0.101	0.059	1	T_early
Timp2	0.00476924	0.140135	0.127	0.078	1	T_early
Nampt	0.00480158	0.286942	0.101	0.059	1	T_early
Slc25a1	0.00621574	0.163239	0.104	0.062	1	T_early
Zfp637	0.0063971	0.205523	0.101	0.06	1	T_early
Dnajc17	0.00691698	0.141424	0.11	0.067	1	T_early
Trbv1	0.00844107	0.879582	0.065	0.116	1	T_early
Cxcr31	0	2.06036	0.685	0.184	0	T_Cxcr3
Il7r1	0	1.80176	0.622	0.223	0	T_Cxcr3
Ly6a	0	1.1776	0.838	0.483	0	T_Cxcr3
Ly6e1	0	1.40859	0.892	0.538	0	T_Cxcr3
Ctla2a	0	1.30301	0.707	0.364	0	T_Cxcr3
Ltb1	0	1.05428	0.858	0.536	0	T_Cxcr3
Emb1	0	1.52362	0.498	0.177	0	T_Cxcr3
Cd271	0	1.12865	0.611	0.297	0	T_Cxcr3
Pglyrp1	0	0.975342	0.726	0.43	0	T_Cxcr3
Itgax	0	0.899158	0.603	0.327	0	T_Cxcr3
Apobec31	0	0.699921	0.687	0.452	0	T_Cxcr3
Armc7	0	0.76307	0.568	0.333	0	T_Cxcr3
Dgka1	0	0.60637	0.759	0.53	0	T_Cxcr3
Gpr1831	0	1.47907	0.311	0.101	0	T_Cxcr3
Gimap7	0	0.603315	0.894	0.693	0	T_Cxcr3
Tagln21	0	0.76465	0.897	0.696	0	T_Cxcr3
Ctla4	0	1.437	0.251	0.065	0	T_Cxcr3
Samhd1	0	0.584464	0.889	0.715	0	T_Cxcr3
S100a11	0	0.557022	0.918	0.763	0	T_Cxcr3
Kbtbd111	0	1.83231	0.178	0.04	0	T_Cxcr3
Tcf71	0	1.94375	0.145	0.031	0	T_Cxcr3
Chil5	0	2.67877	0.116	0.016	0	T_Cxcr3
Cd3d1	0	0.454396	0.985	0.897	0	T_Cxcr3
Shisa51	0	0.645688	0.997	0.92	0	T_Cxcr3
Ms4a6b	0	0.433464	0.986	0.917	0	T_Cxcr3
Crip1	0	0.534495	0.993	0.928	0	T_Cxcr3
S100a6	0	0.7011	0.997	0.943	0	T_Cxcr3
Rpl291	0	0.583843	0.999	0.946	0	T_Cxcr3
Rps22	0	0.334912	0.999	0.957	0	T_Cxcr3
Rps15a1	0	0.265692	1	0.958	0	T_Cxcr3
Rps51	0	0.278199	1	0.96	0	T_Cxcr3
Rps91	0	0.30032	0.999	0.959	0	T_Cxcr3
Rplp01	0	0.284509	1	0.963	0	T_Cxcr3
Rpl181	0	0.356028	1	0.965	0	T_Cxcr3
Rpsa1	0	0.33295	1	0.971	0	T_Cxcr3
Ms4a4b	0	0.383696	1	0.984	0	T_Cxcr3
Cd551	1.57953e-302	1.96433	0.119	0.026	8.314e-298	T_Cxcr3
Ifi27l2a1	1.70331e-301	0.904838	0.502	0.285	8.96557e-297	T_Cxcr3
Cd71	9.87304e-297	0.843274	0.612	0.392	5.19677e-292	T_Cxcr3
Rnf144a1	2.66592e-293	1.88895	0.114	0.025	1.40323e-288	T_Cxcr3
Coro1a1	5.23923e-292	0.3059	0.998	0.963	2.75772e-287	T_Cxcr3
AW112010	2.48829e-287	0.368137	0.992	0.923	1.30974e-282	T_Cxcr3
Rpl121	9.54546e-282	0.404223	0.978	0.891	5.02435e-277	T_Cxcr3
Gimap61	2.81319e-281	0.433977	0.939	0.81	1.48075e-276	T_Cxcr3
Rpl27a1	1.68994e-277	0.263733	1	0.956	8.89519e-273	T_Cxcr3
Cd44	3.97041e-277	0.937141	0.38	0.19	2.08987e-272	T_Cxcr3
Gzmm1	4.81586e-275	1.64834	0.209	0.077	2.53488e-270	T_Cxcr3
Rplp11	9.25904e-274	0.263645	1	0.958	4.87359e-269	T_Cxcr3
Rpl301	1.36631e-273	0.258544	1	0.958	7.19173e-269	T_Cxcr3
Rpl7a1	6.8753e-272	0.345066	0.992	0.922	3.61888e-267	T_Cxcr3
Rbm3	4.07216e-268	0.486945	0.89	0.729	2.14342e-263	T_Cxcr3
Tigit	2.0323e-266	0.927855	0.363	0.179	1.06972e-261	T_Cxcr3
Epsti1	4.51587e-264	0.391003	0.96	0.858	2.37698e-259	T_Cxcr3
Traf11	9.75377e-259	0.732122	0.451	0.245	5.134e-254	T_Cxcr3
Fam102a1	2.29237e-258	0.920447	0.331	0.158	1.20661e-253	T_Cxcr3
F2rl11	4.13467e-256	2.06805	0.101	0.022	2.17632e-251	T_Cxcr3
Lcn41	1.84293e-255	1.31059	0.212	0.081	9.70044e-251	T_Cxcr3
Rpl191	1.43678e-253	0.213231	1	0.967	7.56263e-249	T_Cxcr3
Acot7	3.44157e-250	0.77682	0.495	0.291	1.81151e-245	T_Cxcr3
Slfn11	2.82897e-248	0.69512	0.541	0.327	1.48906e-243	T_Cxcr3
Rpl411	1.74828e-247	0.257413	1	0.962	9.20227e-243	T_Cxcr3
Rpl10a1	2.03312e-245	0.290569	0.996	0.945	1.07016e-240	T_Cxcr3
Ccr2	6.69834e-243	0.494112	0.827	0.646	3.52574e-238	T_Cxcr3
Gm8369	3.45201e-236	0.939349	0.314	0.152	1.817e-231	T_Cxcr3
Eef1a11	4.87953e-235	0.211884	1	0.978	2.56839e-230	T_Cxcr3
Mif1	1.09064e-232	0.691776	0.587	0.38	5.74071e-228	T_Cxcr3
Sub1	8.73534e-228	0.394115	0.942	0.834	4.59794e-223	T_Cxcr3
Rnf1381	4.65654e-227	0.631047	0.635	0.43	2.45102e-222	T_Cxcr3
Rps131	5.53584e-226	0.22251	1	0.961	2.91384e-221	T_Cxcr3
Gstp31	5.45671e-225	1.51335	0.158	0.054	2.87219e-220	T_Cxcr3
Sidt11	1.22621e-224	0.724257	0.413	0.23	6.45428e-220	T_Cxcr3
Cd28	2.06394e-223	0.595749	0.564	0.356	1.08638e-218	T_Cxcr3
Spint21	9.09438e-223	1.48126	0.149	0.05	4.78692e-218	T_Cxcr3
Plac81	1.13848e-220	0.669006	0.551	0.356	5.99248e-216	T_Cxcr3
Gimap4	1.92692e-218	0.327394	0.972	0.894	1.01425e-213	T_Cxcr3
Ier3	1.07145e-216	1.28401	0.222	0.095	5.6397e-212	T_Cxcr3
Reck1	3.30271e-208	1.43849	0.127	0.039	1.73842e-203	T_Cxcr3
Rpl18a1	7.25265e-208	0.203857	1	0.969	3.8175e-203	T_Cxcr3
Cotl11	7.78966e-208	0.576916	0.722	0.536	4.10016e-203	T_Cxcr3
[truncated: 11,958 more rows]
